# Supplementary material
Source: PubMed Central journal article supplement (PMC3235257)

**Sup. Fig.1: DNA methylation at a CpG site in the promoter of the MGMT gene was correlated with paternal stress during infancy in girls only.**

DNA methylation at the blotted CpG site in the promoter to the MGMT gene (encoding O-6-methylguanine-DNA methyltransferase) was negatively associated with paternal stress during infancy in girls ( $\rho = -.52$ , -20.4% DNA methylation change, slope =  $-.33$  (95% CI =  $-.49 - -.16$ ), FDR=0%). No statistically significant association for this CpG site was found in the full group or boys-only analysis. The average beta scale was restricted to show values between 0.15-0.65 rather than the full range of 0-1.0. Girls are represented as triangles and boys as crosses. Regression lines for the full group are solid, wide-dashed for girls only, and narrow-dashed for boys only. None of the other 25 CpG sites from the MGMT gene locus were associated with parental stress as judged by our criteria (FDR < 20%). We also note that the MGMT probe (cg14129786) overlaps with a single nucleotide polymorphism (rs73384837) found in populations of African descent from the 1000 genome project.

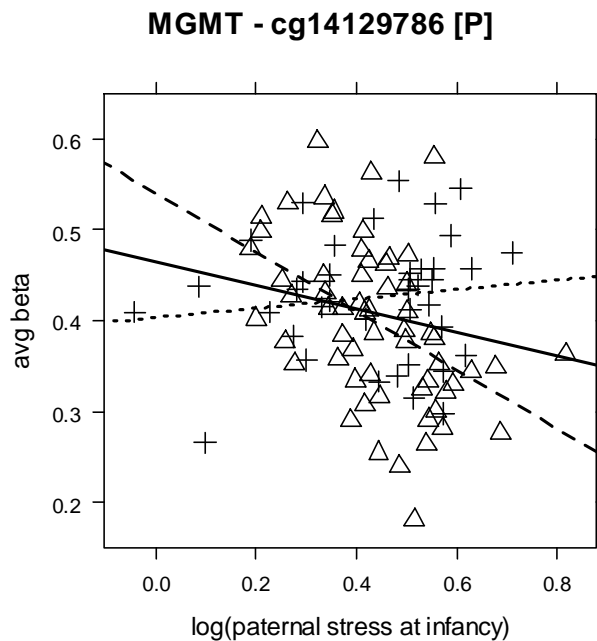

Supplement: NIHMS313621-supplement-Supp_Figure_S1.pdf [file NIHMS313621-supplement-Supp_Figure_S1.pdf]
