# Supplementary material
Source: PubMed Central journal article supplement (PMC3235257)

**Sup. Fig.3: DNA methylation at three CpG sites in the MGC33302 gene (also known as MFSD8/CLN7) was correlated with paternal stress during preschool in girls only.**

Three CpG sites in the first intron of the MGC33302 (alias MFSD8, encoding a putative lysosomal transporter) were negatively associated in girls with paternal stress at preschool. Specifically, these included the HCS site cg03482087 ( $\rho = -.61$ , -5.4% DNA methylation change, slope =  $-.08$  (95% CI =  $-.11 - -.04$ ), FDR = 0%), and the 2 MCS sites cg03883519 ( $\rho = -.41$ , -6.4% DNA methylation change, slope =  $-.09$  (95% CI =  $-.18 - 0$ ), FDR = 7.4%) and cg15557833 ( $\rho = -.34$ , -5.8% DNA methylation change, slope =  $-.08$  (95% CI =  $-.15 - -.02$ ), FDR = 13.7%). No statistically significant association was found in the full group or boys-only analysis

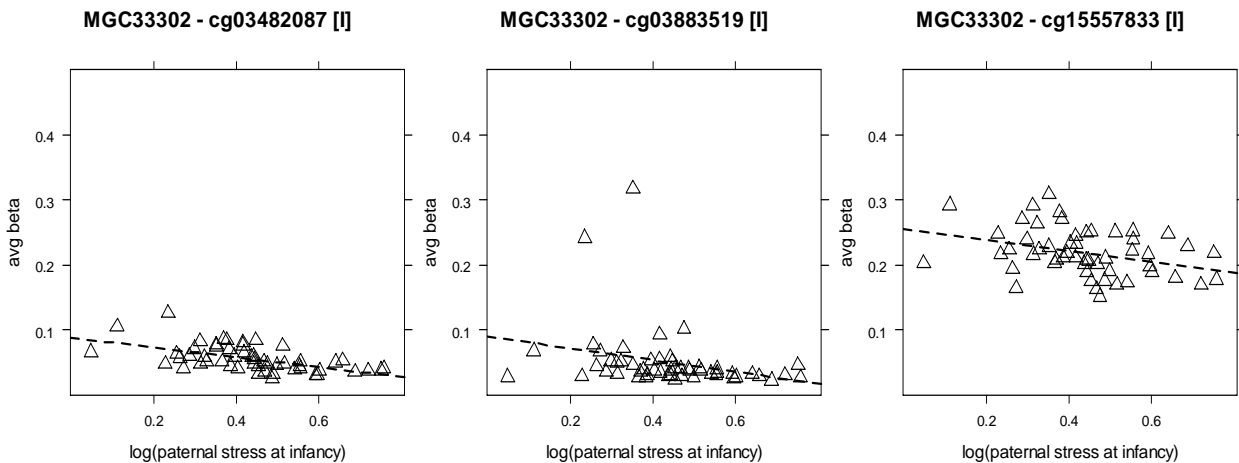

Supplement: NIHMS313621-supplement-Supp_Figure_S3.pdf [file NIHMS313621-supplement-Supp_Figure_S3.pdf]
