# Supplementary material
Source: PubMed Central journal article supplement (PMC3235257)
Supplement: NIHMS313621-supplement-Supp_Table_S1.pdf [file NIHMS313621-supplement-Supp_Table_S1.pdf]

**Sup. Table 1:** Correlation between maternal stress during infancy and increased DNA methylation in adolescence in full sample (all CpG sites with FDR <20%). Sites with greater than 5% differential methylation are highlighted in grey.

| Gene               | CpG Site   | Slope | Range | Differential Methylation | Spearman $\rho$ | FDR |
|--------------------|------------|-------|-------|--------------------------|-----------------|-----|
| PKN1a <sup>a</sup> | cg19103609 | 0.091 | 0.185 | 0.065                    | 0.400           | 0   |
| TPM3               | cg24490338 | 0.031 | 0.117 | 0.022                    | 0.317           | 0   |
| GRHPR              | cg05845503 | 0.012 | 0.051 | 0.009                    | 0.315           | 0   |
| PGAM2              | cg26057752 | 0.135 | 0.313 | 0.096                    | 0.312           | 0   |
| RBP2               | cg17778120 | 0.027 | 0.065 | 0.019                    | 0.312           | 0   |
| C8orf32            | cg12646585 | 0.016 | 0.051 | 0.011                    | 0.311           | 0   |
| RASA2 <sup>a</sup> | cg20247102 | 0.021 | 0.060 | 0.015                    | 0.302           | 0   |
| PRSS21             | cg21085768 | 0.074 | 0.190 | 0.053                    | 0.300           | 0   |
| FLJ46380           | cg19180828 | 0.098 | 0.321 | 0.070                    | 0.297           | 0   |
| BMP10              | cg12711530 | 0.078 | 0.204 | 0.055                    | 0.292           | 0   |
| LSM10              | cg12880200 | 0.021 | 0.053 | 0.015                    | 0.292           | 0   |
| RAB3GAP2           | cg08293760 | 0.014 | 0.063 | 0.010                    | 0.285           | 0   |
| PQLC2              | cg06305312 | 0.008 | 0.047 | 0.006                    | 0.283           | 0   |
| UGT8               | cg25892041 | 0.056 | 0.140 | 0.040                    | 0.282           | 0   |
| MTMR3              | cg03538345 | 0.075 | 0.181 | 0.054                    | 0.275           | 0   |
| HCA112             | cg02244695 | 0.038 | 0.102 | 0.027                    | 0.272           | 0   |
| ATG4C              | cg03370542 | 0.040 | 0.121 | 0.029                    | 0.271           | 0   |
| BMP8A              | cg17685111 | 0.056 | 0.172 | 0.040                    | 0.270           | 0   |
| C1orf115           | cg01471713 | 0.048 | 0.150 | 0.034                    | 0.269           | 0   |
| FSTL3              | cg23260026 | 0.058 | 0.225 | 0.041                    | 0.268           | 0   |
| ZC3H12A            | cg18891404 | 0.011 | 0.041 | 0.008                    | 0.268           | 0   |
| ENO2               | cg17303299 | 0.016 | 0.061 | 0.011                    | 0.267           | 0   |
| TESSP1             | cg22059008 | 0.065 | 0.218 | 0.046                    | 0.267           | 0   |
| FBXO17             | cg24010336 | 0.064 | 0.255 | 0.046                    | 0.265           | 0   |
| TM9SF4             | cg27643859 | 0.048 | 0.119 | 0.034                    | 0.264           | 0   |
| CD3G               | cg15880738 | 0.076 | 0.235 | 0.054                    | 0.264           | 0   |
| MAPKAP1            | cg09155852 | 0.013 | 0.046 | 0.009                    | 0.264           | 0   |
| EXTL1              | cg04629204 | 0.070 | 0.187 | 0.050                    | 0.262           | 0   |
| RTCD1              | cg26661897 | 0.029 | 0.105 | 0.020                    | 0.261           | 0   |
| HIST1H4I           | cg02599464 | 0.021 | 0.069 | 0.015                    | 0.257           | 0   |
| PITPNB             | cg25477181 | 0.008 | 0.107 | 0.006                    | 0.254           | 0   |
| NQO2               | cg00365193 | 0.064 | 0.210 | 0.046                    | 0.254           | 0   |
| TRPC3              | cg18474934 | 0.091 | 0.331 | 0.065                    | 0.253           | 0   |

|              |            |       |       |       |       |   |
|--------------|------------|-------|-------|-------|-------|---|
| ATG5         | cg09354267 | 0.074 | 0.250 | 0.053 | 0.252 | 0 |
| ZNF146       | cg02275359 | 0.042 | 0.465 | 0.030 | 0.251 | 0 |
| MUC7         | cg03970609 | 0.224 | 0.770 | 0.159 | 0.251 | 0 |
| AGA          | cg00398048 | 0.040 | 0.165 | 0.029 | 0.251 | 0 |
| ATG7         | cg27056145 | 0.024 | 0.080 | 0.017 | 0.250 | 0 |
| ESAM         | cg18170080 | 0.021 | 0.079 | 0.015 | 0.250 | 0 |
| DYNLL2       | cg07056057 | 0.058 | 0.220 | 0.041 | 0.250 | 0 |
| SAA1         | cg03458191 | 0.032 | 0.093 | 0.023 | 0.249 | 0 |
| NEUROG1      | cg04330449 | 0.082 | 0.239 | 0.058 | 0.249 | 0 |
| HSPA12B      | cg15127733 | 0.063 | 0.254 | 0.045 | 0.249 | 0 |
| PGAM2        | cg23616741 | 0.146 | 0.415 | 0.104 | 0.248 | 0 |
| PLEKHB1      | cg02254407 | 0.100 | 0.351 | 0.071 | 0.248 | 0 |
| DKFZP566N034 | cg15297650 | 0.059 | 0.241 | 0.042 | 0.247 | 0 |
| DNM2         | cg17165284 | 0.085 | 0.223 | 0.060 | 0.247 | 0 |
| EIF5A2       | cg26209058 | 0.010 | 0.074 | 0.007 | 0.246 | 0 |
| WFIKKN2      | cg07168556 | 0.076 | 0.304 | 0.054 | 0.245 | 0 |
| ARPP-21      | cg05615150 | 0.061 | 0.168 | 0.044 | 0.245 | 0 |
| SORD         | cg06424894 | 0.104 | 0.327 | 0.074 | 0.245 | 0 |
| GNMT         | cg27588902 | 0.021 | 0.073 | 0.015 | 0.245 | 0 |
| SPTBN1       | cg13618372 | 0.037 | 0.118 | 0.026 | 0.243 | 0 |
| GP1BB        | cg07359545 | 0.117 | 0.447 | 0.083 | 0.242 | 0 |
| ZNF488       | cg08341667 | 0.034 | 0.089 | 0.024 | 0.242 | 0 |
| UPP2         | cg03520136 | 0.047 | 0.216 | 0.033 | 0.242 | 0 |
| HMG20A       | cg22211866 | 0.039 | 0.119 | 0.028 | 0.242 | 0 |
| HSPA6        | cg13817266 | 0.102 | 0.315 | 0.072 | 0.240 | 0 |
| IPO8         | cg25943131 | 0.017 | 0.052 | 0.012 | 0.239 | 0 |
| GJA4         | cg15006973 | 0.056 | 0.219 | 0.040 | 0.239 | 0 |
| ST3GAL3      | cg09903430 | 0.016 | 0.050 | 0.011 | 0.238 | 0 |
| ABCB5        | cg21643191 | 0.070 | 0.204 | 0.050 | 0.238 | 0 |
| DHX32        | cg12869240 | 0.067 | 0.196 | 0.048 | 0.238 | 0 |
| CBR3         | cg14564494 | 0.019 | 0.078 | 0.014 | 0.237 | 0 |
| KIAA1822L    | cg00613344 | 0.041 | 0.139 | 0.029 | 0.237 | 0 |
| TNRC4        | cg26050734 | 0.072 | 0.188 | 0.051 | 0.236 | 0 |
| GABRD        | cg06063714 | 0.077 | 0.223 | 0.055 | 0.236 | 0 |
| WT1          | cg13641903 | 0.054 | 0.208 | 0.038 | 0.235 | 0 |
| ZZEF1        | cg07607921 | 0.018 | 0.100 | 0.013 | 0.235 | 0 |
| TMEM2        | cg11558474 | 0.038 | 0.129 | 0.027 | 0.234 | 0 |
| PARK2        | cg21926612 | 0.013 | 0.070 | 0.009 | 0.233 | 0 |
| HCA112       | cg26385222 | 0.043 | 0.204 | 0.031 | 0.233 | 0 |

|                      |            |       |       |       |       |   |
|----------------------|------------|-------|-------|-------|-------|---|
| PON2                 | cg07666065 | 0.026 | 0.072 | 0.019 | 0.233 | 0 |
| CCDC41               | cg02639007 | 0.024 | 0.068 | 0.017 | 0.232 | 0 |
| C5orf21 <sup>b</sup> | cg18370979 | 0.078 | 0.413 | 0.055 | 0.232 | 0 |
| CD74                 | cg22975568 | 0.033 | 0.108 | 0.024 | 0.231 | 0 |
| HYPK                 | cg24125648 | 0.054 | 0.178 | 0.038 | 0.231 | 0 |
| CGB1                 | cg17164520 | 0.038 | 0.193 | 0.027 | 0.231 | 0 |
| BAIAP3               | cg18282543 | 0.015 | 0.074 | 0.011 | 0.230 | 0 |
| ISL1                 | cg21410991 | 0.019 | 0.053 | 0.014 | 0.229 | 0 |
| CUL3                 | cg07310661 | 0.035 | 0.121 | 0.025 | 0.229 | 0 |
| SPINK4               | cg00079056 | 0.027 | 0.106 | 0.019 | 0.229 | 0 |
| PRSS21               | cg22730830 | 0.124 | 0.401 | 0.089 | 0.229 | 0 |
| NKX6-2               | cg08441806 | 0.029 | 0.168 | 0.021 | 0.228 | 0 |
| CACNG6               | cg04080057 | 0.056 | 0.171 | 0.040 | 0.228 | 0 |
| CHST8                | cg24739326 | 0.029 | 0.088 | 0.021 | 0.228 | 0 |
| ADAMTS19             | cg13701109 | 0.075 | 0.254 | 0.053 | 0.226 | 0 |
| ARSG                 | cg00374717 | 0.040 | 0.142 | 0.029 | 0.226 | 0 |
| TBX1                 | cg02887841 | 0.040 | 0.151 | 0.029 | 0.226 | 0 |
| SCNN1B               | cg00925717 | 0.024 | 0.144 | 0.017 | 0.226 | 0 |
| SNRPN                | cg16321029 | 0.060 | 0.288 | 0.042 | 0.226 | 0 |
| CAST1                | cg04759439 | 0.063 | 0.160 | 0.045 | 0.226 | 0 |
| KRTAP19-5            | cg07374637 | 0.038 | 0.121 | 0.027 | 0.226 | 0 |
| CALCOCO1             | cg16847051 | 0.017 | 0.061 | 0.012 | 0.226 | 0 |
| GLULD1               | cg03352153 | 0.022 | 0.084 | 0.016 | 0.225 | 0 |
| SEC63D1              | cg03714397 | 0.033 | 0.079 | 0.023 | 0.224 | 0 |
| SLC5A4               | cg21578906 | 0.030 | 0.104 | 0.021 | 0.223 | 0 |
| RORA                 | cg27167601 | 0.056 | 0.162 | 0.040 | 0.223 | 0 |
| USP54                | cg16193203 | 0.028 | 0.123 | 0.020 | 0.223 | 0 |
| COL11A2              | cg01635061 | 0.013 | 0.083 | 0.009 | 0.223 | 0 |
| C14orf58             | cg04001333 | 0.141 | 0.584 | 0.100 | 0.223 | 0 |
| CD47                 | cg06806080 | 0.032 | 0.144 | 0.023 | 0.223 | 0 |
| KIAA0859             | cg01639034 | 0.016 | 0.168 | 0.012 | 0.223 | 0 |
| INDOL1               | cg16957569 | 0.109 | 0.367 | 0.077 | 0.222 | 0 |
| CHRN3                | cg00367281 | 0.070 | 0.226 | 0.050 | 0.222 | 0 |
| PANK1                | cg14967972 | 0.018 | 0.076 | 0.013 | 0.222 | 0 |
| PCK1                 | cg16101800 | 0.163 | 0.429 | 0.116 | 0.221 | 0 |
| TRIM49               | cg22767466 | 0.030 | 0.097 | 0.022 | 0.221 | 0 |
| PAN3                 | cg08923109 | 0.035 | 0.154 | 0.025 | 0.220 | 0 |
| PDE4D                | cg05992340 | 0.027 | 0.093 | 0.019 | 0.220 | 0 |
| HLCS                 | cg27519424 | 0.144 | 0.363 | 0.102 | 0.220 | 0 |

|          |            |       |       |       |       |   |
|----------|------------|-------|-------|-------|-------|---|
| FBXO25   | cg01680762 | 0.055 | 0.196 | 0.039 | 0.220 | 0 |
| BRD4     | cg08044694 | 0.018 | 0.104 | 0.013 | 0.220 | 0 |
| NR1D2    | cg14452875 | 0.012 | 0.054 | 0.009 | 0.218 | 0 |
| CMTM1    | cg10221501 | 0.036 | 0.142 | 0.026 | 0.218 | 0 |
| OTUD4    | cg09779091 | 0.051 | 0.223 | 0.036 | 0.218 | 0 |
| LEP      | cg19594666 | 0.069 | 0.325 | 0.049 | 0.218 | 0 |
| HIF3A    | cg02879662 | 0.013 | 0.062 | 0.009 | 0.218 | 0 |
| MAP2K6   | cg04228573 | 0.021 | 0.080 | 0.015 | 0.217 | 0 |
| CREG2    | cg09498007 | 0.031 | 0.154 | 0.022 | 0.217 | 0 |
| MGAT5    | cg08251036 | 0.025 | 0.072 | 0.018 | 0.217 | 0 |
| BANK1    | cg00332153 | 0.098 | 0.307 | 0.070 | 0.217 | 0 |
| DIRAS3   | cg22901840 | 0.070 | 0.356 | 0.050 | 0.217 | 0 |
| KLHL5    | cg19906926 | 0.040 | 0.110 | 0.028 | 0.216 | 0 |
| MOBP     | cg16729794 | 0.091 | 0.261 | 0.065 | 0.216 | 0 |
| MGC26856 | cg07684809 | 0.021 | 0.071 | 0.015 | 0.216 | 0 |
| PLA2G1B  | cg16396488 | 0.043 | 0.217 | 0.030 | 0.216 | 0 |
| STRA6    | cg11787522 | 0.118 | 0.435 | 0.084 | 0.215 | 0 |
| COG2     | cg17031727 | 0.030 | 0.137 | 0.021 | 0.215 | 0 |
| MPZ      | cg00101227 | 0.014 | 0.098 | 0.010 | 0.214 | 0 |
| DLG5     | cg17791617 | 0.023 | 0.124 | 0.017 | 0.214 | 0 |
| FLJ14054 | cg16434306 | 0.114 | 0.835 | 0.081 | 0.213 | 0 |
| SEMA5B   | cg00212549 | 0.026 | 0.221 | 0.018 | 0.213 | 0 |
| AFAR3    | cg11376198 | 0.149 | 0.455 | 0.106 | 0.213 | 0 |
| POLR3B   | cg24107581 | 0.016 | 0.059 | 0.012 | 0.213 | 0 |
| KCNV2    | cg26428825 | 0.031 | 0.105 | 0.022 | 0.213 | 0 |
| ADNP     | cg16003500 | 0.013 | 0.057 | 0.009 | 0.213 | 0 |
| SCO1     | cg12478185 | 0.100 | 0.302 | 0.071 | 0.212 | 0 |
| BAZ2B    | cg01416012 | 0.064 | 0.237 | 0.045 | 0.212 | 0 |

Note. FDR = false discovery rate (%). Slope = slope of least squared line. Range = range of average beta.

<sup>a</sup>Also significant for girls (but not boys) in gender-specific analyses.

<sup>b</sup>Also significant for boys (but not girls) in gender-specific analyses.
