# Supplementary material
Source: PubMed Central journal article supplement (PMC3235257)
Supplement: NIHMS313621-supplement-Supp_Table_S2.pdf [file NIHMS313621-supplement-Supp_Table_S2.pdf]

**Sup. Table 2:** Correlation between paternal stress during preschool and increased DNA methylation in adolescence in full sample (all CpG sites with FDR <20%). Sites with greater than 5% differential methylation are highlighted in grey.

| Gene      | CpG Site   | Slope | Range | Differential Methylation | Spearman $\rho$ | FDR    |
|-----------|------------|-------|-------|--------------------------|-----------------|--------|
| TK1       | cg22061523 | 0.039 | 0.093 | 0.028                    | 0.447           | 0.000  |
| MGC42630  | cg22543128 | 0.058 | 0.130 | 0.041                    | 0.418           | 0.000  |
| PGA5      | cg11957986 | 0.113 | 0.482 | 0.080                    | 0.394           | 17.619 |
| SFRP1     | cg22418909 | 0.016 | 0.049 | 0.011                    | 0.389           | 17.619 |
| IL28RA    | cg07509155 | 0.020 | 0.062 | 0.014                    | 0.388           | 17.619 |
| DCN       | cg04088433 | 0.195 | 0.489 | 0.138                    | 0.384           | 17.619 |
| LRRC8D    | cg26783856 | 0.027 | 0.057 | 0.019                    | 0.381           | 17.619 |
| GALNT8    | cg14920334 | 0.141 | 0.762 | 0.100                    | 0.374           | 17.619 |
| ATP8A2    | cg12111714 | 0.069 | 0.141 | 0.049                    | 0.367           | 17.619 |
| FSTL3     | cg10503234 | 0.077 | 0.185 | 0.055                    | 0.362           | 17.619 |
| EIF3S2    | cg26093687 | 0.057 | 0.175 | 0.040                    | 0.361           | 17.619 |
| PRB4      | cg14076161 | 0.086 | 0.213 | 0.061                    | 0.361           | 17.619 |
| OCM       | cg22152667 | 0.023 | 0.053 | 0.016                    | 0.360           | 17.619 |
| PPP1R3C   | cg09775312 | 0.044 | 0.135 | 0.031                    | 0.359           | 17.619 |
| IGF2AS    | cg25574024 | 0.117 | 0.782 | 0.083                    | 0.357           | 17.619 |
| TNFRSF13B | cg18152830 | 0.031 | 0.061 | 0.022                    | 0.357           | 17.619 |
| OTUB2     | cg22981461 | 0.042 | 0.098 | 0.029                    | 0.357           | 17.619 |
| KCNA5     | cg24605304 | 0.021 | 0.060 | 0.015                    | 0.357           | 17.619 |
| AKR1A1    | cg11323731 | 0.020 | 0.071 | 0.014                    | 0.357           | 17.619 |
| CDH9      | cg19475870 | 0.139 | 0.270 | 0.099                    | 0.354           | 17.619 |
| MYOD1     | cg24322623 | 0.021 | 0.049 | 0.015                    | 0.351           | 17.619 |
| PAPPA2    | cg10994126 | 0.087 | 0.233 | 0.061                    | 0.350           | 17.619 |
| MGC50811  | cg10498097 | 0.046 | 0.106 | 0.033                    | 0.349           | 18.898 |
| RUNX3     | cg25178645 | 0.014 | 0.027 | 0.010                    | 0.348           | 18.898 |
| PLSCR2    | cg03075662 | 0.074 | 0.188 | 0.052                    | 0.348           | 18.898 |
| CHFR      | cg17387870 | 0.081 | 0.214 | 0.057                    | 0.345           | 18.898 |
| WISP1     | cg03670238 | 0.135 | 0.293 | 0.095                    | 0.345           | 18.898 |
| APH1B     | cg17207590 | 0.053 | 0.142 | 0.038                    | 0.344           | 18.898 |
| SSTR1     | cg27590397 | 0.016 | 0.070 | 0.011                    | 0.343           | 18.898 |
| ZNF124    | cg21918500 | 0.059 | 0.217 | 0.042                    | 0.343           | 18.898 |
| FLJ21820  | cg02946570 | 0.184 | 0.385 | 0.131                    | 0.342           | 18.898 |

Note. FDR = false discovery rate (%). Slope = slope of least squared line. Range = range of average beta.
