# Supplementary material
Source: PubMed Central journal article supplement (PMC3235257)
Supplement: NIHMS313621-supplement-Supp_Table_S3.pdf [file NIHMS313621-supplement-Supp_Table_S3.pdf]

**Sup. Table 3:** Correlation of parental stress during infancy and preschool with DNA methylation levels of selected candidate genes. FDR corresponds to the multiple testing correction applied to the entire data set (n=18231).

A) NR3C1 (CpG site = cg08818984) - One CpG site from the GR region was assayed.

|                       | <b>Slope</b> | <b>Range</b> | <b>Differential Methylation</b> | <b>Spearman <math>\rho</math></b> | <b>FDR</b> |
|-----------------------|--------------|--------------|---------------------------------|-----------------------------------|------------|
| <b>All</b>            |              |              |                                 |                                   |            |
| Maternal at Infancy   | 0.0127       | 0.4071       | 0.0090                          | -0.0460                           | 100        |
| Maternal at Preschool | 0.0399       | 0.4071       | 0.0296                          | 0.0141                            | 92.57      |
| Paternal at Infancy   | 0.0099       | 0.4071       | 0.0085                          | 0.0129                            | 102.19     |
| Paternal at Preschool | -0.0277      | 0.4071       | -0.0196                         | -0.0810                           | 76.67      |
| <b>Boys Only</b>      |              |              |                                 |                                   |            |
| Maternal at Infancy   | -0.0179      | 0.2678       | -0.0103                         | -0.0673                           | 94.29      |
| Maternal at Preschool | -0.0331      | 0.2350       | -0.0158                         | -0.0401                           | 111.23     |
| Paternal at Infancy   | -0.0615      | 0.2678       | -0.0462                         | -0.0709                           | 112.46     |
| Paternal at Preschool | -0.0206      | 0.2350       | -0.0135                         | -0.0645                           | 100        |
| <b>Girls Only</b>     |              |              |                                 |                                   |            |
| Maternal at Infancy   | 0.0254       | 0.3965       | 0.0180                          | -0.0416                           | 94.39      |
| Maternal at Preschool | 0.0497       | 0.3965       | 0.0369                          | 0.0452                            | 108.25     |
| Paternal at Infancy   | 0.0915       | 0.3965       | 0.0575                          | 0.0401                            | 100.16     |
| Paternal at Preschool | -0.0334      | 0.3965       | -0.0237                         | -0.0966                           | 67.08      |

Note. FDR = false discovery rate (%). Slope = slope of least squared line. Range = range of average beta

**B):** DRD4 (CpG Site = cg06825142) - One CpG site from the DRD4 region was assayed.

|                          | <b>Slope</b> | <b>Range</b> | <b>Differential Methylation</b> | <b>Spearman <math>\rho</math></b> | <b>FDR</b> |
|--------------------------|--------------|--------------|---------------------------------|-----------------------------------|------------|
| <b><u>All</u></b>        |              |              |                                 |                                   |            |
| Maternal at Infancy      | 0.0032       | 0.0635       | 0.0023                          | 0.1311                            | 100.48     |
| Maternal at Preschool    | 0.0023       | 0.0635       | 0.0017                          | 0.0806                            | 92.57      |
| Paternal at Infancy      | 0.0012       | 0.0611       | 0.0010                          | 0.0458                            | 102.19     |
| Paternal at Preschool    | 0.0007       | 0.0635       | 0.0005                          | 0.0500                            | 70.78      |
| <b><u>Boys Only</u></b>  |              |              |                                 |                                   |            |
| Maternal at Infancy      | 0.0051       | 0.0218       | 0.0029                          | 0.1954                            | 93.92      |
| Maternal at Preschool    | -0.0013      | 0.0253       | -0.0006                         | -0.0111                           | 111.23     |
| Paternal at Infancy      | -0.0069      | 0.0218       | -0.0052                         | -0.2063                           | 112.46     |
| Paternal at Preschool    | 0.0020       | 0.0218       | 0.0013                          | 0.0579                            | 104.33     |
| <b><u>Girls Only</u></b> |              |              |                                 |                                   |            |
| Maternal at Infancy      | 0.0023       | 0.0635       | 0.0016                          | 0.0792                            | 94.39      |
| Maternal at Preschool    | 0.0039       | 0.0635       | 0.0029                          | 0.1164                            | 108.25     |
| Paternal at Infancy      | 0.0101       | 0.0611       | 0.0064                          | 0.1810                            | 100.16     |
| Paternal at Preschool    | -0.0003      | 0.0635       | -0.0002                         | 0.0384                            | 62.45      |

Note. FDR = false discovery rate (%). Slope = slope of least squared line. Range = range of average beta

**C)** SLC6A4 (CpG site = cg22584138) - Two CpG sites from the SLC6A4 region was assayed on the Illumina Infinium array but only one CpG site was used in the final analysis.

|                       | <b>Slope</b> | <b>Range</b> | <b>Differential Methylation</b> | <b>Spearman <math>\rho</math></b> | <b>FDR</b> |
|-----------------------|--------------|--------------|---------------------------------|-----------------------------------|------------|
| <b>All</b>            |              |              |                                 |                                   |            |
| Maternal at Infancy   | 0.0048       | 0.1674       | 0.0034                          | 0.0108                            | 100.48     |
| Maternal at Preschool | 0.0016       | 0.1674       | 0.0012                          | -0.0064                           | 100        |
| Paternal at Infancy   | 0.0316       | 0.1674       | 0.0271                          | 0.0809                            | 102.19     |
| Paternal at Preschool | 0.0383       | 0.1674       | 0.0271                          | 0.1699                            | 57.65      |
| <b>Boys Only</b>      |              |              |                                 |                                   |            |
| Maternal at Infancy   | -0.0203      | 0.1441       | -0.0116                         | -0.0570                           | 94.29      |
| Maternal at Preschool | -0.0046      | 0.1441       | -0.0022                         | 0.0011                            | 111.23     |
| Paternal at Infancy   | 0.0506       | 0.1441       | 0.0380                          | 0.1405                            | 100        |
| Paternal at Preschool | 0.0301       | 0.1441       | 0.0197                          | 0.1760                            | 104.33     |
| <b>Girls Only</b>     |              |              |                                 |                                   |            |
| Maternal at Infancy   | 0.0191       | 0.1626       | 0.0136                          | 0.0582                            | 94.39      |
| Maternal at Preschool | 0.0081       | 0.1626       | 0.0060                          | -0.0062                           | 100        |
| Paternal at Infancy   | 0.0101       | 0.1626       | 0.0064                          | 0.0194                            | 100.16     |
| Paternal at Preschool | 0.0442       | 0.1626       | 0.0314                          | 0.1666                            | 42.83      |

Note. FDR = false discovery rate (%). Slope = slope of least squared line. Range = range of average beta

D) BDNF (CpG site = cg16257091) - One of two CpG sites from the BDNF region assayed.

|                       | Slope   | Range  | Differential Methylation | Spearman $\rho$ | FDR    |
|-----------------------|---------|--------|--------------------------|-----------------|--------|
| <b>All</b>            |         |        |                          |                 |        |
| Maternal at Infancy   | 0.0161  | 0.0610 | 0.0115                   | 0.1608          | 100.48 |
| Maternal at Preschool | 0.0155  | 0.0610 | 0.0115                   | 0.1623          | 92.57  |
| Paternal at Infancy   | 0.0082  | 0.0589 | 0.0070                   | 0.1383          | 102.19 |
| Paternal at Preschool | 0.0035  | 0.0589 | 0.0025                   | 0.0462          | 71.96  |
| <b>Boys Only</b>      |         |        |                          |                 |        |
| Maternal at Infancy   | 0.0161  | 0.0567 | 0.0092                   | 0.1568          | 94.55  |
| Maternal at Preschool | 0.0137  | 0.0567 | 0.0066                   | 0.1205          | 111.23 |
| Paternal at Infancy   | 0.0031  | 0.0546 | 0.0023                   | 0.0911          | 100    |
| Paternal at Preschool | -0.0073 | 0.0546 | -0.0048                  | -0.0429         | 100    |
| <b>Girls Only</b>     |         |        |                          |                 |        |
| Maternal at Infancy   | 0.0147  | 0.0493 | 0.0104                   | 0.1911          | 94.39  |
| Maternal at Preschool | 0.0120  | 0.0493 | 0.0089                   | 0.1589          | 108.25 |
| Paternal at Infancy   | 0.0149  | 0.0493 | 0.0093                   | 0.1258          | 100.16 |
| Paternal at Preschool | 0.0110  | 0.0493 | 0.0078                   | 0.0743          | 56.14  |

Note. FDR = false discovery rate (%). Slope = slope of least squared line. Range = range of average beta

E) BDNF (CpG site = cg27351358) - One of two CpG sites from the BDNF region assayed.

|                          | <b>Slope</b> | <b>Range</b> | <b>Differential Methylation</b> | <b>Spearman <math>\rho</math></b> | <b>FDR</b> |
|--------------------------|--------------|--------------|---------------------------------|-----------------------------------|------------|
| <b><u>All</u></b>        |              |              |                                 |                                   |            |
| Maternal at Infancy      | -0.0138      | 0.0992       | -0.0098                         | -0.0783                           | 100        |
| Maternal at Preschool    | -0.0081      | 0.0992       | -0.0060                         | 0.0068                            | 92.57      |
| Paternal at Infancy      | -0.0003      | 0.0992       | -0.0003                         | 0.0184                            | 102.19     |
| Paternal at Preschool    | -0.0069      | 0.0992       | -0.0049                         | -0.1108                           | 72.97      |
| <b><u>Boys Only</u></b>  |              |              |                                 |                                   |            |
| Maternal at Infancy      | -0.0176      | 0.0689       | -0.0101                         | -0.1179                           | 94.29      |
| Maternal at Preschool    | -0.0137      | 0.0689       | -0.0066                         | -0.0617                           | 111.23     |
| Paternal at Infancy      | -0.0334      | 0.0689       | -0.0251                         | -0.3858                           | 112.46     |
| Paternal at Preschool    | -0.0074      | 0.0689       | -0.0049                         | -0.1492                           | 100        |
| <b><u>Girls Only</u></b> |              |              |                                 |                                   |            |
| Maternal at Infancy      | -0.0112      | 0.0992       | -0.0079                         | -0.0499                           | 94.39      |
| Maternal at Preschool    | -0.0041      | 0.0992       | -0.0031                         | 0.0436                            | 108.25     |
| Paternal at Infancy      | 0.0357       | 0.0992       | 0.0224                          | 0.2568                            | 100.09     |
| Paternal at Preschool    | -0.0066      | 0.0992       | -0.0047                         | -0.0989                           | 67.08      |

Note. FDR = false discovery rate (%). Slope = slope of least squared line. Range = range of average beta

F) COMT (CpG site = cg15926585) - One CpG site from the COMT region assayed.

|                          | <b>Slope</b> | <b>Range</b> | <b>Differential Methylation</b> | <b>Spearman <math>\rho</math></b> | <b>FDR</b> |
|--------------------------|--------------|--------------|---------------------------------|-----------------------------------|------------|
| <b><u>All</u></b>        |              |              |                                 |                                   |            |
| Maternal at Infancy      | -0.0094      | 0.1506       | -0.0067                         | -0.0525                           | 100        |
| Maternal at Preschool    | 0.0141       | 0.1506       | 0.0105                          | 0.1111                            | 92.57      |
| Paternal at Infancy      | 0.0013       | 0.1506       | 0.0011                          | 0.0217                            | 102.19     |
| Paternal at Preschool    | 0.0178       | 0.1038       | 0.0126                          | 0.0718                            | 66.86      |
| <b><u>Boys Only</u></b>  |              |              |                                 |                                   |            |
| Maternal at Infancy      | -0.0026      | 0.1021       | -0.0015                         | -0.0578                           | 94.29      |
| Maternal at Preschool    | 0.0205       | 0.1021       | 0.0098                          | 0.2218                            | 111.23     |
| Paternal at Infancy      | 0.0092       | 0.1021       | 0.0069                          | 0.0561                            | 100        |
| Paternal at Preschool    | 0.0142       | 0.1021       | 0.0093                          | 0.0040                            | 104.33     |
| <b><u>Girls Only</u></b> |              |              |                                 |                                   |            |
| Maternal at Infancy      | -0.0139      | 0.1432       | -0.0099                         | -0.0603                           | 94.39      |
| Maternal at Preschool    | 0.0095       | 0.1432       | 0.0071                          | 0.0564                            | 108.25     |
| Paternal at Infancy      | -0.0069      | 0.1357       | -0.0044                         | -0.0343                           | 100.53     |
| Paternal at Preschool    | 0.0204       | 0.0964       | 0.0145                          | 0.0808                            | 56.14      |

Note. FDR = false discovery rate (%). Slope = slope of least squared line. Range = range of average beta

G) SLC6A3 (CpG site = cg26205131) - One of two CpG sites from the DAT1 region assayed.

|                       | Slope   | Range  | Differential Methylation | Spearman $\rho$ | FDR    |
|-----------------------|---------|--------|--------------------------|-----------------|--------|
| <b>All</b>            |         |        |                          |                 |        |
| Maternal at Infancy   | 0.0059  | 0.1771 | 0.0042                   | -0.0043         | 100    |
| Maternal at Preschool | 0.0016  | 0.1771 | 0.0012                   | 0.0226          | 92.57  |
| Paternal at Infancy   | -0.0158 | 0.1771 | -0.0136                  | -0.0286         | 102.18 |
| Paternal at Preschool | 0.0003  | 0.1771 | 0.0002                   | 0.0625          | 69.08  |
| <b>Boys Only</b>      |         |        |                          |                 |        |
| Maternal at Infancy   | 0.0035  | 0.0613 | 0.0020                   | -0.1352         | 81.10  |
| Maternal at Preschool | -0.0105 | 0.0613 | -0.0050                  | -0.1649         | 111.23 |
| Paternal at Infancy   | 0.0011  | 0.0613 | 0.0008                   | -0.0518         | 112.46 |
| Paternal at Preschool | 0.0177  | 0.0613 | 0.0115                   | 0.0876          | 104.33 |
| <b>Girls Only</b>     |         |        |                          |                 |        |
| Maternal at Infancy   | 0.0069  | 0.1771 | 0.0049                   | 0.0413          | 94.39  |
| Maternal at Preschool | 0.0048  | 0.1771 | 0.0036                   | 0.0872          | 108.25 |
| Paternal at Infancy   | -0.0343 | 0.1771 | -0.0216                  | -0.0146         | 100.53 |
| Paternal at Preschool | -0.0121 | 0.1771 | -0.0086                  | 0.0491          | 60.43  |

Note. FDR = false discovery rate (%). Slope = slope of least squared line. Range = range of average beta

H) SLC6A3 (CpG site = cg13202751) - One of two CpG sites from the DAT1 region assayed.

|                       | <b>Slope</b> | <b>Range</b> | <b>Differential Methylation</b> | <b>Spearman <math>\rho</math></b> | <b>FDR</b> |
|-----------------------|--------------|--------------|---------------------------------|-----------------------------------|------------|
| <b>All</b>            |              |              |                                 |                                   |            |
| Maternal at Infancy   | 0.0253       | 0.1094       | 0.0180                          | 0.1219                            | 100.48     |
| Maternal at Preschool | 0.0281       | 0.1094       | 0.0209                          | 0.0920                            | 92.57      |
| Paternal at Infancy   | -0.0042      | 0.1083       | -0.0036                         | 0.0289                            | 102.19     |
| Paternal at Preschool | -0.0109      | 0.1066       | -0.0077                         | -0.0232                           | 81.87      |
| <b>Boys Only</b>      |              |              |                                 |                                   |            |
| Maternal at Infancy   | 0.0369       | 0.0996       | 0.0211                          | 0.1984                            | 93.86      |
| Maternal at Preschool | 0.0396       | 0.0996       | 0.0189                          | 0.1257                            | 111.23     |
| Paternal at Infancy   | -0.0079      | 0.0996       | -0.0059                         | -0.0152                           | 112.46     |
| Paternal at Preschool | -0.0344      | 0.0969       | -0.0225                         | -0.1452                           | 100        |
| <b>Girls Only</b>     |              |              |                                 |                                   |            |
| Maternal at Infancy   | 0.0163       | 0.1040       | 0.0116                          | 0.0965                            | 94.39      |
| Maternal at Preschool | 0.0169       | 0.1040       | 0.0126                          | 0.0681                            | 108.25     |
| Paternal at Infancy   | 0.0018       | 0.1029       | 0.0011                          | 0.0637                            | 100.16     |
| Paternal at Preschool | 0.0054       | 0.1040       | 0.0038                          | 0.0546                            | 60.43      |

Note. FDR = false discovery rate (%). Slope = slope of least squared line. Range = range of average beta
