# Supplementary material
Source: PubMed Central journal article supplement (PMC3235257)
Supplement: NIHMS313621-supplement-Supp_Table_S4.pdf [file NIHMS313621-supplement-Supp_Table_S4.pdf]

**Sup. Table 4:** Correlation between maternal stress during infancy and increased DNA methylation in adolescence in boys only (all CpG sites with FDR<20%). Sites with greater than 5% differential methylation are highlighted in grey.

| Gene    | CpG Site   | Slope | Range | Differential Methylation | Spearman $\rho$ | FDR |
|---------|------------|-------|-------|--------------------------|-----------------|-----|
| RASA2   | cg20247102 | 0.043 | 0.045 | 0.025                    | 0.581           | 0   |
| MGC4562 | cg15198335 | 0.015 | 0.021 | 0.009                    | 0.536           | 0   |
| PKN1    | cg19103609 | 0.131 | 0.178 | 0.075                    | 0.501           | 0   |

Note. FDR = false discovery rate (%). Slope = slope of least squared line. Range = range of average beta.
