# Supplementary material
Source: PubMed Central journal article supplement (PMC3235257)
Supplement: NIHMS313621-supplement-Supp_Table_S5.pdf [file NIHMS313621-supplement-Supp_Table_S5.pdf]

**Sup. Table 5:** Correlation between maternal stress during infancy and increased DNA methylation in adolescence in girls only (all CpG sites with FDR <20%). Sites with greater than 5% differential methylation are highlighted in grey.

| Gene              | CpG Site   | Slope | Range | Differential Methylation | Spearman $\rho$ | FDR |
|-------------------|------------|-------|-------|--------------------------|-----------------|-----|
| <u>Girls only</u> |            |       |       |                          |                 |     |
| C5orf21           | cg18370979 | 0.150 | 0.400 | 0.107                    | 0.505           | 0   |

Note. FDR = false discovery rate (%). Slope = slope of least squared line. Range = range of average beta.
