# Supplementary material
Source: PubMed Central journal article supplement (PMC3235257)
Supplement: NIHMS313621-supplement-Supp_Table_S6.pdf [file NIHMS313621-supplement-Supp_Table_S6.pdf]

**Sup. Table 6:** Correlation between paternal stress during infancy and decreased DNA methylation in adolescence in girls only (all CpG sites with FDR<20%). Sites with greater than 5% differential methylation are highlighted in grey.

| Gene  | CpG Site   | Slope  | Range | Differential Methylation | Spearman $\rho$ | FDR |
|-------|------------|--------|-------|--------------------------|-----------------|-----|
| MGMT  | cg14129786 | -0.325 | 0.418 | -0.204                   | -0.520          | 0   |
| GPR61 | cg23749046 | -0.053 | 0.067 | -0.034                   | -0.486          | 0   |
| CRMP1 | cg22680204 | -0.037 | 0.052 | -0.023                   | -0.448          | 0   |

Note. FDR = false discovery rate (%). Slope = slope of least squared line. Range = range of average beta.
