# Supplementary material
Source: PubMed Central journal article supplement (PMC3235257)
Supplement: NIHMS313621-supplement-Supp_Table_S7.pdf [file NIHMS313621-supplement-Supp_Table_S7.pdf]

**Sup. Table 7:** Correlation between paternal stress during preschool and increased DNA methylation in adolescence in girls only (all CpG sites with FDR<20%). Sites with greater than 5% differential methylation are highlighted in grey.

| Gene     | CpG Site   | Slope | Range | Differential Methylation | Spearman $\rho$ | FDR    |
|----------|------------|-------|-------|--------------------------|-----------------|--------|
| C11orf49 | cg26198807 | 0.129 | 0.171 | 0.092                    | 0.560           | 0.000  |
| C19orf30 | cg20893022 | 0.074 | 0.088 | 0.053                    | 0.552           | 0.000  |
| TRDN     | cg14462830 | 0.193 | 0.334 | 0.137                    | 0.551           | 0.000  |
| SFRP1    | cg22418909 | 0.020 | 0.028 | 0.014                    | 0.550           | 0.000  |
| METAP1   | cg07829809 | 0.178 | 0.219 | 0.126                    | 0.534           | 0.000  |
| C19orf30 | cg21300318 | 0.122 | 0.179 | 0.087                    | 0.517           | 0.000  |
| CNTNAP3  | cg13059782 | 0.030 | 0.048 | 0.022                    | 0.514           | 5.743  |
| FAM113A  | cg23462402 | 0.077 | 0.105 | 0.054                    | 0.512           | 5.743  |
| C15orf21 | cg08057475 | 0.069 | 0.103 | 0.049                    | 0.511           | 5.743  |
| SLIT2    | cg03742003 | 0.035 | 0.064 | 0.025                    | 0.511           | 5.743  |
| MGC42630 | cg22543128 | 0.081 | 0.130 | 0.057                    | 0.510           | 5.743  |
| CD47     | cg06806080 | 0.049 | 0.144 | 0.035                    | 0.507           | 5.743  |
| PRODH2   | cg27039606 | 0.063 | 0.085 | 0.045                    | 0.492           | 5.743  |
| BCAN     | cg21475402 | 0.023 | 0.041 | 0.016                    | 0.492           | 5.743  |
| NR2E1    | cg19697981 | 0.025 | 0.035 | 0.017                    | 0.491           | 5.743  |
| FSTL3    | cg10503234 | 0.108 | 0.154 | 0.076                    | 0.490           | 5.743  |
| PLIN     | cg01348757 | 0.138 | 0.219 | 0.098                    | 0.488           | 5.743  |
| TK1      | cg22061523 | 0.040 | 0.052 | 0.028                    | 0.488           | 5.743  |
| CNGB1    | cg16480209 | 0.047 | 0.065 | 0.033                    | 0.487           | 5.743  |
| PGA5     | cg11957986 | 0.160 | 0.482 | 0.114                    | 0.486           | 5.743  |
| C1orf33  | cg18224761 | 0.108 | 0.200 | 0.076                    | 0.484           | 5.743  |
| CRELD2   | cg15316289 | 0.069 | 0.117 | 0.049                    | 0.484           | 5.743  |
| CNGB3    | cg06757810 | 0.151 | 0.288 | 0.107                    | 0.482           | 5.743  |
| PGK2     | cg06403553 | 0.069 | 0.123 | 0.049                    | 0.482           | 5.743  |
| NA       | cg27348440 | 0.177 | 0.254 | 0.125                    | 0.479           | 5.743  |
| AKR1A1   | cg11323731 | 0.030 | 0.071 | 0.021                    | 0.478           | 5.743  |
| MPPED2   | cg06790862 | 0.105 | 0.240 | 0.075                    | 0.477           | 5.743  |
| CDC14B   | cg20811389 | 0.015 | 0.033 | 0.011                    | 0.468           | 9.143  |
| GABRD    | cg06063714 | 0.087 | 0.176 | 0.062                    | 0.468           | 9.143  |
| PPP1R3C  | cg09775312 | 0.053 | 0.114 | 0.037                    | 0.463           | 9.143  |
| TSC22D4  | cg00834958 | 0.020 | 0.026 | 0.014                    | 0.462           | 9.143  |
| F13A1    | cg03440267 | 0.048 | 0.083 | 0.034                    | 0.462           | 9.143  |
| PAPPA2   | cg10994126 | 0.104 | 0.231 | 0.074                    | 0.462           | 9.143  |
| HNF4A    | cg19717150 | 0.124 | 0.188 | 0.088                    | 0.459           | 9.143  |
| NEDD8    | cg17391929 | 0.025 | 0.043 | 0.018                    | 0.459           | 9.143  |
| MAEL     | cg13249256 | 0.058 | 0.088 | 0.041                    | 0.457           | 11.730 |
| TAS2R8   | cg08507270 | 0.097 | 0.147 | 0.069                    | 0.455           | 11.730 |
| IL28RA   | cg07509155 | 0.028 | 0.062 | 0.020                    | 0.454           | 11.730 |
| SAC      | cg06933072 | 0.077 | 0.138 | 0.055                    | 0.454           | 11.730 |
| C12orf12 | cg10967280 | 0.046 | 0.067 | 0.032                    | 0.453           | 11.730 |
| TRHDE    | cg13663218 | 0.039 | 0.067 | 0.027                    | 0.450           | 11.730 |
| SCYL1    | cg22417398 | 0.023 | 0.043 | 0.016                    | 0.450           | 11.730 |
| TXN2     | cg06293195 | 0.087 | 0.163 | 0.062                    | 0.445           | 11.730 |
| LY86     | cg20162076 | 0.198 | 0.329 | 0.141                    | 0.442           | 15.770 |
| KCNG3    | cg27553955 | 0.091 | 0.133 | 0.065                    | 0.441           | 15.770 |
| TRIM43   | cg27297176 | 0.139 | 0.251 | 0.099                    | 0.440           | 15.770 |
| ENPP3    | cg08678755 | 0.170 | 0.281 | 0.120                    | 0.440           | 15.770 |
| LRRC51   | cg23256971 | 0.059 | 0.112 | 0.042                    | 0.438           | 15.770 |
| APCS     | cg26353877 | 0.058 | 0.088 | 0.041                    | 0.437           | 15.770 |

|           |            |       |       |       |       |        |
|-----------|------------|-------|-------|-------|-------|--------|
| PPAPDC3   | cg18636641 | 0.088 | 0.187 | 0.062 | 0.437 | 15.770 |
| ANAPC4    | cg13918811 | 0.044 | 0.086 | 0.031 | 0.433 | 15.770 |
| ENTPD5    | cg12774845 | 0.037 | 0.079 | 0.026 | 0.430 | 15.770 |
| KIAA0690  | cg02238747 | 0.060 | 0.090 | 0.043 | 0.429 | 15.770 |
| KRT4      | cg12610744 | 0.139 | 0.268 | 0.098 | 0.428 | 15.770 |
| BAG1      | cg21614231 | 0.047 | 0.107 | 0.033 | 0.428 | 15.770 |
| MRPL30    | cg15612847 | 0.105 | 0.216 | 0.074 | 0.427 | 15.770 |
| TMC1      | cg14643978 | 0.049 | 0.079 | 0.035 | 0.427 | 15.770 |
| IL19      | cg05916196 | 0.092 | 0.139 | 0.065 | 0.426 | 15.770 |
| ABCB1     | cg16219122 | 0.085 | 0.174 | 0.060 | 0.425 | 17.895 |
| CPM       | cg20932053 | 0.071 | 0.150 | 0.050 | 0.425 | 17.895 |
| CNTNAP4   | cg25383242 | 0.092 | 0.194 | 0.065 | 0.424 | 17.895 |
| DPCR1     | cg20965815 | 0.097 | 0.209 | 0.069 | 0.423 | 17.895 |
| KRTHA3A   | cg18370227 | 0.046 | 0.075 | 0.032 | 0.423 | 17.895 |
| CDH13     | cg08977371 | 0.026 | 0.103 | 0.018 | 0.422 | 17.895 |
| CHFR      | cg17387870 | 0.112 | 0.205 | 0.080 | 0.422 | 17.895 |
| FLJ10374  | cg20395128 | 0.073 | 0.152 | 0.051 | 0.420 | 17.895 |
| IFNA21    | cg07373172 | 0.074 | 0.191 | 0.052 | 0.419 | 17.895 |
| LOC349236 | cg10645113 | 0.103 | 0.215 | 0.073 | 0.419 | 17.895 |
| CART      | cg20798152 | 0.085 | 0.160 | 0.060 | 0.418 | 17.895 |
| FLRT2     | cg26651233 | 0.033 | 0.054 | 0.023 | 0.417 | 17.895 |
| EBF3      | cg06139836 | 0.018 | 0.035 | 0.012 | 0.417 | 17.895 |
| NGB       | cg15501381 | 0.069 | 0.168 | 0.049 | 0.416 | 17.895 |
| OR12D2    | cg04737405 | 0.139 | 0.321 | 0.098 | 0.416 | 17.895 |
| NRF1      | cg20633959 | 0.047 | 0.708 | 0.033 | 0.416 | 17.895 |
| UCN3      | cg20587968 | 0.089 | 0.217 | 0.063 | 0.415 | 17.895 |
| PLSCR2    | cg03075662 | 0.090 | 0.188 | 0.064 | 0.415 | 17.895 |
| MMP27     | cg06259570 | 0.065 | 0.155 | 0.046 | 0.414 | 17.895 |
| LYZL6     | cg06548519 | 0.146 | 0.246 | 0.103 | 0.414 | 17.895 |
| PRB4      | cg14076161 | 0.095 | 0.213 | 0.067 | 0.414 | 17.895 |
| SPINK1    | cg16360372 | 0.115 | 0.216 | 0.082 | 0.413 | 17.895 |
| VGLL2     | cg03160135 | 0.024 | 0.072 | 0.017 | 0.412 | 17.895 |
| ZDHHC19   | cg03327494 | 0.075 | 0.135 | 0.053 | 0.411 | 17.895 |
| FTS       | cg24633242 | 0.026 | 0.082 | 0.019 | 0.411 | 17.895 |
| RIC3      | cg01043330 | 0.075 | 0.123 | 0.053 | 0.410 | 17.895 |
| PENK      | cg04598121 | 0.024 | 0.049 | 0.017 | 0.410 | 17.895 |
| SIM2      | cg02672220 | 0.049 | 0.084 | 0.035 | 0.410 | 17.895 |
| DEFA6     | cg27212977 | 0.080 | 0.185 | 0.057 | 0.409 | 17.895 |
| NEIL3     | cg09475757 | 0.059 | 0.104 | 0.042 | 0.409 | 17.895 |
| SLC4A7    | cg06798189 | 0.188 | 0.342 | 0.133 | 0.409 | 17.895 |
| VPS16     | cg00231920 | 0.022 | 0.047 | 0.015 | 0.408 | 17.895 |
| MGC4399   | cg18783781 | 0.047 | 0.071 | 0.033 | 0.407 | 17.895 |
| GABRA1    | cg24523000 | 0.135 | 0.291 | 0.096 | 0.406 | 17.895 |
| GH2       | cg02856727 | 0.052 | 0.191 | 0.037 | 0.406 | 17.895 |
| SLC12A5   | cg09015232 | 0.182 | 0.558 | 0.129 | 0.405 | 17.895 |
| FKBP10    | cg21416237 | 0.106 | 0.164 | 0.075 | 0.405 | 17.895 |
| C16orf35  | cg24399405 | 0.050 | 0.111 | 0.035 | 0.403 | 17.895 |
| SYCP3     | cg01127428 | 0.033 | 0.066 | 0.024 | 0.401 | 17.895 |
| BTN1A1    | cg27475152 | 0.025 | 0.054 | 0.018 | 0.401 | 17.895 |
| RB1       | cg19296958 | 0.075 | 0.122 | 0.053 | 0.401 | 17.895 |
| BRF1      | cg16313343 | 0.055 | 0.074 | 0.039 | 0.401 | 17.895 |
| WISP1     | cg03670238 | 0.175 | 0.293 | 0.124 | 0.401 | 17.895 |
| CDK4      | cg16807911 | 0.037 | 0.072 | 0.026 | 0.400 | 17.895 |
| OPN1SW    | cg18181161 | 0.034 | 0.054 | 0.024 | 0.400 | 17.895 |
| PSKH2     | cg17788832 | 0.073 | 0.118 | 0.052 | 0.400 | 17.895 |
| ADCY5     | cg13878010 | 0.037 | 0.069 | 0.026 | 0.399 | 17.895 |

|          |            |       |       |       |       |        |
|----------|------------|-------|-------|-------|-------|--------|
| NMUR1    | cg18250832 | 0.065 | 0.277 | 0.046 | 0.399 | 17.895 |
| NPTX2    | cg00548268 | 0.089 | 0.118 | 0.063 | 0.399 | 17.895 |
| LRRRC8D  | cg26783856 | 0.029 | 0.051 | 0.021 | 0.399 | 17.895 |
| FOXA2    | cg10003443 | 0.070 | 0.138 | 0.049 | 0.399 | 17.895 |
| SCRT1    | cg13302823 | 0.091 | 0.175 | 0.065 | 0.397 | 17.895 |
| HDC      | cg16831889 | 0.175 | 0.299 | 0.124 | 0.397 | 17.895 |
| RIPK3    | cg10318258 | 0.143 | 0.383 | 0.101 | 0.396 | 17.895 |
| TLL7     | cg17237813 | 0.109 | 0.197 | 0.078 | 0.395 | 17.895 |
| FBXO38   | cg02376163 | 0.027 | 0.045 | 0.019 | 0.395 | 17.895 |
| ANK3     | cg12354377 | 0.082 | 0.183 | 0.058 | 0.395 | 17.895 |
| SULT2A1  | cg19139729 | 0.103 | 0.199 | 0.073 | 0.395 | 17.895 |
| OTUB2    | cg22981461 | 0.054 | 0.098 | 0.038 | 0.394 | 17.895 |
| FLJ21820 | cg02946570 | 0.226 | 0.385 | 0.160 | 0.394 | 17.895 |
| CD79B    | cg25729716 | 0.045 | 0.085 | 0.032 | 0.394 | 17.895 |
| ZNF187   | cg26450541 | 0.024 | 0.039 | 0.017 | 0.394 | 17.895 |
| OR7C2    | cg03544379 | 0.098 | 0.484 | 0.069 | 0.393 | 17.895 |
| PHLDB1   | cg06290096 | 0.049 | 0.113 | 0.035 | 0.393 | 17.895 |
| OSBPL5   | cg11219178 | 0.089 | 0.260 | 0.063 | 0.393 | 17.895 |
| STK24    | cg10057295 | 0.024 | 0.039 | 0.017 | 0.393 | 17.895 |
| LCE5A    | cg01868128 | 0.065 | 0.164 | 0.046 | 0.393 | 17.895 |
| RAXL1    | cg25058957 | 0.050 | 0.128 | 0.036 | 0.393 | 17.895 |
| ARL3     | cg18151487 | 0.053 | 0.106 | 0.038 | 0.392 | 17.895 |
| GAS8     | cg15936718 | 0.052 | 0.077 | 0.037 | 0.392 | 17.895 |
| EEF1B2   | cg24330485 | 0.013 | 0.049 | 0.009 | 0.392 | 17.895 |
| FLJ20581 | cg10938486 | 0.098 | 0.228 | 0.070 | 0.391 | 17.895 |
| EDNRB    | cg18003135 | 0.100 | 0.179 | 0.071 | 0.391 | 19.998 |
| SLC22A18 | cg03336167 | 0.181 | 0.427 | 0.129 | 0.391 | 19.998 |
| ADH1A    | cg15677344 | 0.113 | 0.289 | 0.080 | 0.390 | 19.998 |
| ADCY5    | cg13384396 | 0.039 | 0.100 | 0.028 | 0.389 | 19.998 |
| PRX      | cg26200585 | 0.142 | 0.371 | 0.101 | 0.389 | 19.998 |
| SSTR1    | cg27590397 | 0.014 | 0.027 | 0.010 | 0.389 | 19.998 |
| PAK2     | cg21840599 | 0.016 | 0.048 | 0.011 | 0.388 | 19.998 |
| DPT      | cg26220985 | 0.044 | 0.198 | 0.031 | 0.388 | 19.998 |
| ADCY9    | cg03945800 | 0.026 | 0.056 | 0.018 | 0.388 | 19.998 |
| VMO1     | cg24182328 | 0.083 | 0.146 | 0.059 | 0.388 | 19.998 |
| CDC23    | cg23112213 | 0.033 | 0.050 | 0.023 | 0.388 | 19.998 |
| EMR1     | cg22889448 | 0.107 | 0.700 | 0.076 | 0.387 | 19.998 |
| GPR85    | cg13383491 | 0.218 | 0.370 | 0.155 | 0.387 | 19.998 |
| DDX28    | cg06042828 | 0.063 | 0.123 | 0.045 | 0.387 | 19.998 |
| RFX4     | cg01920232 | 0.020 | 0.049 | 0.014 | 0.387 | 19.998 |
| C1orf56  | cg11852073 | 0.037 | 0.073 | 0.026 | 0.387 | 19.998 |
| DDC      | cg03843951 | 0.075 | 0.142 | 0.053 | 0.386 | 19.998 |
| GLB1     | cg27034836 | 0.025 | 0.080 | 0.018 | 0.385 | 19.998 |
| TMEM39A  | cg26519339 | 0.014 | 0.030 | 0.010 | 0.385 | 19.998 |
| CEACAM3  | cg13322449 | 0.124 | 0.268 | 0.088 | 0.384 | 19.998 |
| MYH3     | cg18190433 | 0.154 | 0.299 | 0.109 | 0.384 | 19.998 |
| PRKCABP  | cg23621115 | 0.091 | 0.215 | 0.064 | 0.384 | 19.998 |
| C1orf182 | cg18993334 | 0.048 | 0.083 | 0.034 | 0.383 | 19.998 |
| RARRES1  | cg09503974 | 0.042 | 0.081 | 0.030 | 0.383 | 19.998 |
| AMPD1    | cg15740508 | 0.127 | 0.244 | 0.090 | 0.383 | 19.998 |
| CHFR     | cg17524886 | 0.050 | 0.104 | 0.036 | 0.383 | 19.998 |
| STON1    | cg27016609 | 0.085 | 0.344 | 0.060 | 0.382 | 19.998 |
| PKD2L1   | cg10365880 | 0.058 | 0.121 | 0.041 | 0.382 | 19.998 |
| DCN      | cg04088433 | 0.214 | 0.424 | 0.151 | 0.382 | 19.998 |
| RNASEH2A | cg05657090 | 0.039 | 0.081 | 0.028 | 0.382 | 19.998 |
| SETD4    | cg12218747 | 0.148 | 0.275 | 0.105 | 0.382 | 19.998 |

|           |            |       |       |       |       |        |
|-----------|------------|-------|-------|-------|-------|--------|
| MGC50559  | cg08647727 | 0.026 | 0.059 | 0.018 | 0.382 | 19.998 |
| SFTPG     | cg09408780 | 0.136 | 0.237 | 0.096 | 0.381 | 19.998 |
| GALNT13   | cg01161611 | 0.160 | 0.350 | 0.113 | 0.381 | 19.998 |
| EIF2B2    | cg23911465 | 0.028 | 0.046 | 0.020 | 0.380 | 19.998 |
| ANKRD2    | cg13271963 | 0.052 | 0.098 | 0.037 | 0.380 | 19.998 |
| POPDC2    | cg19868730 | 0.089 | 0.220 | 0.063 | 0.380 | 19.998 |
| FLT3      | cg24454143 | 0.117 | 0.406 | 0.083 | 0.379 | 19.998 |
| CHAF1B    | cg26024531 | 0.034 | 0.058 | 0.024 | 0.379 | 19.998 |
| RGS11     | cg01344518 | 0.076 | 0.137 | 0.054 | 0.379 | 19.998 |
| CPLX2     | cg19885761 | 0.057 | 0.788 | 0.040 | 0.379 | 19.998 |
| HISPPD2A  | cg03533811 | 0.017 | 0.036 | 0.012 | 0.378 | 19.998 |
| LINCR     | cg03102516 | 0.115 | 0.218 | 0.081 | 0.378 | 19.998 |
| TMEM117   | cg16863447 | 0.030 | 0.054 | 0.021 | 0.377 | 19.998 |
| TNIP3     | cg20950277 | 0.209 | 0.392 | 0.148 | 0.377 | 19.998 |
| C1orf201  | cg03140978 | 0.074 | 0.121 | 0.052 | 0.377 | 19.998 |
| C5orf13   | cg05869964 | 0.069 | 0.114 | 0.049 | 0.377 | 19.998 |
| NRXN3     | cg15572745 | 0.124 | 0.275 | 0.088 | 0.377 | 19.998 |
| KCNA10    | cg07830847 | 0.053 | 0.109 | 0.037 | 0.377 | 19.998 |
| ZFR       | cg13954292 | 0.108 | 0.285 | 0.077 | 0.377 | 19.998 |
| MGC14376  | cg11099291 | 0.015 | 0.035 | 0.010 | 0.376 | 19.998 |
| MGMT      | cg07453748 | 0.061 | 0.133 | 0.043 | 0.376 | 19.998 |
| LRAP      | cg11769360 | 0.135 | 0.229 | 0.096 | 0.376 | 19.998 |
| GUCA2A    | cg06003187 | 0.032 | 0.140 | 0.023 | 0.375 | 19.998 |
| KIAA1409  | cg16034652 | 0.105 | 0.187 | 0.075 | 0.375 | 19.998 |
| ZMYND17   | cg23599056 | 0.072 | 0.177 | 0.051 | 0.375 | 19.998 |
| ELF2      | cg05088386 | 0.082 | 0.192 | 0.058 | 0.375 | 19.998 |
| UPK2      | cg00693307 | 0.074 | 0.152 | 0.052 | 0.375 | 19.998 |
| ERG       | cg17274064 | 0.049 | 0.086 | 0.035 | 0.375 | 19.998 |
| TRIM54    | cg25218351 | 0.144 | 0.602 | 0.102 | 0.374 | 19.998 |
| ATF7IP2   | cg00461841 | 0.144 | 0.333 | 0.102 | 0.374 | 19.998 |
| C4orf17   | cg27563778 | 0.163 | 0.365 | 0.116 | 0.374 | 19.998 |
| FLJ33708  | cg17774418 | 0.098 | 0.233 | 0.070 | 0.374 | 19.998 |
| RRM2      | cg18623836 | 0.079 | 0.174 | 0.056 | 0.374 | 19.998 |
| ZNF142    | cg21781546 | 0.110 | 0.194 | 0.078 | 0.373 | 19.998 |
| SMBP      | cg10377211 | 0.016 | 0.029 | 0.011 | 0.373 | 19.998 |
| CAMK1     | cg23243617 | 0.020 | 0.047 | 0.014 | 0.373 | 19.998 |
| RHOC      | cg00016968 | 0.085 | 0.219 | 0.060 | 0.373 | 19.998 |
| PLCB4     | cg24736099 | 0.087 | 0.159 | 0.061 | 0.373 | 19.998 |
| MGC33367  | cg07804582 | 0.069 | 0.156 | 0.049 | 0.373 | 19.998 |
| CORO2B    | cg08290628 | 0.065 | 0.176 | 0.046 | 0.372 | 19.998 |
| DIO1      | cg03886898 | 0.055 | 0.124 | 0.039 | 0.372 | 19.998 |
| NPFF      | cg01657380 | 0.086 | 0.203 | 0.061 | 0.371 | 19.998 |
| C9orf66   | cg08909157 | 0.036 | 0.060 | 0.026 | 0.371 | 19.998 |
| SCGN      | cg16954341 | 0.027 | 0.049 | 0.019 | 0.371 | 19.998 |
| APOBEC1   | cg16879115 | 0.112 | 0.222 | 0.080 | 0.371 | 19.998 |
| TUSC3     | cg12089439 | 0.039 | 0.065 | 0.028 | 0.370 | 19.998 |
| HSD3B1    | cg16175792 | 0.112 | 0.220 | 0.080 | 0.370 | 19.998 |
| ARHGAP22  | cg20506783 | 0.026 | 0.057 | 0.018 | 0.370 | 19.998 |
| FLT4      | cg13927251 | 0.026 | 0.047 | 0.019 | 0.369 | 19.998 |
| SNTG1     | cg15585987 | 0.116 | 0.270 | 0.082 | 0.369 | 19.998 |
| TNFRSF13B | cg18152830 | 0.033 | 0.059 | 0.024 | 0.369 | 19.998 |
| RANBP1    | cg11594228 | 0.066 | 0.170 | 0.047 | 0.369 | 19.998 |
| MOGAT2    | cg12531542 | 0.045 | 0.104 | 0.032 | 0.368 | 19.998 |
| TEB1      | cg26530497 | 0.058 | 0.119 | 0.041 | 0.368 | 19.998 |
| C6orf182  | cg08550724 | 0.084 | 0.158 | 0.060 | 0.367 | 19.998 |
| MGC42630  | cg05174079 | 0.119 | 0.246 | 0.085 | 0.367 | 19.998 |

|           |            |       |       |       |       |        |
|-----------|------------|-------|-------|-------|-------|--------|
| CRNN      | cg16713808 | 0.167 | 0.332 | 0.118 | 0.367 | 19.998 |
| SSRP1     | cg01511567 | 0.032 | 0.123 | 0.023 | 0.366 | 19.998 |
| CHFR      | cg06462703 | 0.020 | 0.049 | 0.014 | 0.365 | 19.998 |
| ACTA1     | cg13547644 | 0.040 | 0.120 | 0.028 | 0.364 | 19.998 |
| LMCD1     | cg20595215 | 0.029 | 0.042 | 0.020 | 0.364 | 19.998 |
| BTBD6     | cg23034818 | 0.021 | 0.048 | 0.015 | 0.364 | 19.998 |
| PLEKHB1   | cg02254407 | 0.141 | 0.351 | 0.100 | 0.363 | 19.998 |
| CHFR      | cg00338702 | 0.022 | 0.044 | 0.015 | 0.363 | 19.998 |
| CGA       | cg07981495 | 0.109 | 0.168 | 0.078 | 0.363 | 19.998 |
| ACRV1     | cg00066153 | 0.075 | 0.178 | 0.053 | 0.363 | 19.998 |
| SLCO1C1   | cg04091078 | 0.125 | 0.298 | 0.089 | 0.361 | 19.998 |
| SLC25A16  | cg08620470 | 0.052 | 0.097 | 0.037 | 0.361 | 19.998 |
| RASSF7    | cg14896003 | 0.074 | 0.112 | 0.052 | 0.361 | 19.998 |
| PSTPIP1   | cg12703269 | 0.048 | 0.079 | 0.034 | 0.360 | 19.998 |
| KCNJ13    | cg13982505 | 0.226 | 0.362 | 0.160 | 0.360 | 19.998 |
| SETX      | cg06353948 | 0.084 | 0.207 | 0.060 | 0.360 | 19.998 |
| ZBTB32    | cg12497692 | 0.015 | 0.025 | 0.011 | 0.360 | 19.998 |
| CYP2A6    | cg05910970 | 0.062 | 0.137 | 0.044 | 0.360 | 19.998 |
| INDO      | cg08465774 | 0.167 | 0.286 | 0.119 | 0.360 | 19.998 |
| ADH7      | cg06425515 | 0.116 | 0.294 | 0.083 | 0.360 | 19.998 |
| C3orf24   | cg13560548 | 0.160 | 0.269 | 0.114 | 0.360 | 19.998 |
| H1FOO     | cg14519134 | 0.033 | 0.067 | 0.024 | 0.359 | 19.998 |
| LOC205251 | cg24912023 | 0.136 | 0.295 | 0.096 | 0.359 | 19.998 |
| NUP210    | cg24642820 | 0.101 | 0.158 | 0.071 | 0.359 | 19.998 |
| SLC39A12  | cg19856444 | 0.146 | 0.309 | 0.103 | 0.358 | 19.998 |
| WNT8B     | cg26109803 | 0.138 | 0.350 | 0.098 | 0.358 | 19.998 |
| RCHY1     | cg14178991 | 0.144 | 0.404 | 0.102 | 0.358 | 19.998 |
| GALC      | cg24058132 | 0.092 | 0.188 | 0.065 | 0.358 | 19.998 |
| DCAKD     | cg09214551 | 0.174 | 0.389 | 0.123 | 0.358 | 19.998 |
| KCNK7     | cg17918700 | 0.086 | 0.193 | 0.061 | 0.358 | 19.998 |
| LRCH4     | cg20500081 | 0.049 | 0.124 | 0.035 | 0.357 | 19.998 |
| TAS2R38   | cg25481253 | 0.151 | 0.324 | 0.107 | 0.357 | 19.998 |
| CCL25     | cg21274570 | 0.070 | 0.179 | 0.050 | 0.357 | 19.998 |
| C5orf14   | cg22197830 | 0.068 | 0.281 | 0.048 | 0.357 | 19.998 |
| ERBB2     | cg11993754 | 0.013 | 0.028 | 0.009 | 0.356 | 19.998 |
| ARL10     | cg27092035 | 0.016 | 0.026 | 0.012 | 0.356 | 19.998 |
| NOS3      | cg25007250 | 0.034 | 0.097 | 0.024 | 0.356 | 19.998 |
| FBXL19    | cg04368877 | 0.051 | 0.108 | 0.036 | 0.356 | 19.998 |
| CGREF1    | cg22740783 | 0.022 | 0.057 | 0.016 | 0.356 | 19.998 |
| ZDHHC21   | cg04217218 | 0.079 | 0.256 | 0.056 | 0.356 | 19.998 |
| C9orf65   | cg11195662 | 0.016 | 0.030 | 0.011 | 0.356 | 19.998 |
| CAPZB     | cg13319175 | 0.158 | 0.331 | 0.112 | 0.355 | 19.998 |
| PXMP4     | cg27194921 | 0.020 | 0.061 | 0.014 | 0.355 | 19.998 |
| FOXJ1     | cg01294702 | 0.035 | 0.067 | 0.025 | 0.355 | 19.998 |
| NEU4      | cg20791593 | 0.092 | 0.192 | 0.065 | 0.355 | 19.998 |
| RB1       | cg01738359 | 0.013 | 0.039 | 0.009 | 0.355 | 19.998 |
| PLA2G5    | cg19521927 | 0.108 | 0.214 | 0.077 | 0.355 | 19.998 |
| G3BP      | cg20775840 | 0.011 | 0.041 | 0.008 | 0.354 | 19.998 |
| PGM3      | cg25383093 | 0.064 | 0.163 | 0.045 | 0.354 | 19.998 |
| BIK       | cg26453588 | 0.063 | 0.136 | 0.044 | 0.354 | 19.998 |
| STXBP5    | cg01135200 | 0.016 | 0.095 | 0.012 | 0.354 | 19.998 |
| BAG1      | cg07711515 | 0.042 | 0.088 | 0.030 | 0.354 | 19.998 |
| FBXW10    | cg05127924 | 0.139 | 0.243 | 0.098 | 0.354 | 19.998 |
| EFTUD2    | cg20902737 | 0.023 | 0.045 | 0.017 | 0.354 | 19.998 |
| FUT9      | cg01837719 | 0.029 | 0.047 | 0.020 | 0.353 | 19.998 |
| GM632     | cg26760212 | 0.064 | 0.162 | 0.046 | 0.353 | 19.998 |

|           |            |       |       |       |       |        |
|-----------|------------|-------|-------|-------|-------|--------|
| GIF       | cg18538812 | 0.054 | 0.136 | 0.038 | 0.353 | 19.998 |
| CD81      | cg23125689 | 0.080 | 0.197 | 0.057 | 0.353 | 19.998 |
| FOXG1B    | cg10300684 | 0.024 | 0.053 | 0.017 | 0.353 | 19.998 |
| PDCD1LG2  | cg14440664 | 0.106 | 0.221 | 0.075 | 0.352 | 19.998 |
| HOXA3     | cg25426743 | 0.173 | 0.392 | 0.122 | 0.352 | 19.998 |
| THYN1     | cg09360083 | 0.150 | 0.255 | 0.107 | 0.352 | 19.998 |
| IFT140    | cg10536625 | 0.092 | 0.198 | 0.065 | 0.352 | 19.998 |
| PIK4CA    | cg10568796 | 0.056 | 0.114 | 0.039 | 0.352 | 19.998 |
| P2RY5     | cg13506226 | 0.083 | 0.165 | 0.059 | 0.352 | 19.998 |
| SBF1      | cg15764655 | 0.041 | 0.088 | 0.029 | 0.352 | 19.998 |
| GRB10     | cg25915982 | 0.074 | 0.205 | 0.053 | 0.351 | 19.998 |
| CLDN19    | cg11172423 | 0.034 | 0.066 | 0.024 | 0.351 | 19.998 |
| EGLN1     | cg18979762 | 0.107 | 0.293 | 0.076 | 0.351 | 19.998 |
| PPP2R2D   | cg21750602 | 0.143 | 0.372 | 0.102 | 0.351 | 19.998 |
| PARK2     | cg21926612 | 0.022 | 0.070 | 0.016 | 0.351 | 19.998 |
| MIP       | cg03986640 | 0.047 | 0.197 | 0.033 | 0.351 | 19.998 |
| UNQ9356   | cg18582689 | 0.208 | 0.466 | 0.148 | 0.351 | 19.998 |
| MYLPF     | cg00256074 | 0.050 | 0.103 | 0.036 | 0.351 | 19.998 |
| MRV11     | cg24365867 | 0.069 | 0.202 | 0.049 | 0.351 | 19.998 |
| RPL9      | cg07027075 | 0.048 | 0.099 | 0.034 | 0.350 | 19.998 |
| C10orf65  | cg13985639 | 0.047 | 0.090 | 0.033 | 0.350 | 19.998 |
| FABP6     | cg13599007 | 0.092 | 0.211 | 0.065 | 0.350 | 19.998 |
| WT1       | cg04456238 | 0.046 | 0.118 | 0.033 | 0.350 | 19.998 |
| SLC30A3   | cg03875195 | 0.036 | 0.079 | 0.026 | 0.350 | 19.998 |
| EVI5      | cg00519208 | 0.151 | 0.382 | 0.107 | 0.349 | 19.998 |
| TREM2     | cg20095587 | 0.052 | 0.156 | 0.037 | 0.348 | 19.998 |
| ZNF124    | cg21918500 | 0.019 | 0.105 | 0.014 | 0.348 | 19.998 |
| C20orf149 | cg01531431 | 0.098 | 0.235 | 0.069 | 0.348 | 19.998 |
| PTCRA     | cg20790540 | 0.035 | 0.122 | 0.025 | 0.348 | 19.998 |
| GALR1     | cg00662556 | 0.065 | 0.141 | 0.046 | 0.348 | 19.998 |
| TAS2R7    | cg06496654 | 0.155 | 0.410 | 0.110 | 0.348 | 19.998 |
| CHAT      | cg12052765 | 0.029 | 0.050 | 0.021 | 0.348 | 19.998 |
| NMBR      | cg08109815 | 0.055 | 0.149 | 0.039 | 0.347 | 19.998 |
| ASF1A     | cg04183425 | 0.134 | 0.319 | 0.095 | 0.347 | 19.998 |
| RAPGEF1   | cg07285276 | 0.077 | 0.163 | 0.054 | 0.346 | 19.998 |
| ADRB3     | cg01386493 | 0.066 | 0.197 | 0.047 | 0.346 | 19.998 |
| K6IRS4    | cg27222589 | 0.092 | 0.201 | 0.065 | 0.346 | 19.998 |
| COL16A1   | cg02989257 | 0.156 | 0.348 | 0.111 | 0.346 | 19.998 |
| RUNX3     | cg14182690 | 0.099 | 0.153 | 0.070 | 0.346 | 19.998 |
| CPSF1     | cg18511989 | 0.012 | 0.062 | 0.008 | 0.346 | 19.998 |
| TEC       | cg21152662 | 0.044 | 0.160 | 0.031 | 0.345 | 19.998 |
| SLC35C1   | cg10516359 | 0.105 | 0.244 | 0.075 | 0.345 | 19.998 |
| OR8B8     | cg16612699 | 0.051 | 0.080 | 0.036 | 0.345 | 19.998 |
| ELA3A     | cg14238120 | 0.099 | 0.163 | 0.070 | 0.345 | 19.998 |
| ATOH8     | cg15649452 | 0.013 | 0.034 | 0.009 | 0.345 | 19.998 |
| IGF2AS    | cg25574024 | 0.186 | 0.782 | 0.132 | 0.345 | 19.998 |
| PPP3R2    | cg15765694 | 0.114 | 0.264 | 0.081 | 0.344 | 19.998 |

Note. FDR = false discovery rate (%). Slope = slope of least squared line. Range = range of average beta.
