# Supplementary material
Source: PubMed Central journal article supplement (PMC3235257)
Supplement: NIHMS313621-supplement-Supp_Table_S8.pdf [file NIHMS313621-supplement-Supp_Table_S8.pdf]

**Sup. Table 8:** Comparison of correlations between paternal stress during preschool and increased DNA methylation in adolescence in full sample and girls only (limited to all CpG sites with FDR<20% from full sample). All sites with FDR<20% in girls only are highlighted in grey.

| Gene      | CpG Site   | Full Sample              |                 |        | Girls Only               |                 |        |
|-----------|------------|--------------------------|-----------------|--------|--------------------------|-----------------|--------|
|           |            | Differential Methylation | Spearman $\rho$ | FDR    | Differential Methylation | Spearman $\rho$ | FDR    |
| TK1       | cg22061523 | 0.028                    | 0.447           | 0.000  | 0.028                    | 0.488           | 5.743  |
| MGC42630  | cg22543128 | 0.041                    | 0.418           | 0.000  | 0.057                    | 0.510           | 5.743  |
| PGA5      | cg11957986 | 0.080                    | 0.394           | 17.619 | 0.114                    | 0.486           | 5.743  |
| SFRP1     | cg22418909 | 0.011                    | 0.389           | 17.619 | 0.014                    | 0.550           | 0.000  |
| IL28RA    | cg07509155 | 0.014                    | 0.388           | 17.619 | 0.020                    | 0.454           | 11.730 |
| DCN       | cg04088433 | 0.138                    | 0.384           | 17.619 | 0.151                    | 0.382           | 19.998 |
| LRRC8D    | cg26783856 | 0.019                    | 0.381           | 17.619 | 0.021                    | 0.399           | 17.895 |
| GALNT8    | cg14920334 | 0.100                    | 0.374           | 17.619 | 0.097                    | 0.274           | 28.753 |
| ATP8A2    | cg12111714 | 0.049                    | 0.367           | 17.619 | 0.056                    | 0.340           | 22.532 |
| FSTL3     | cg10503234 | 0.055                    | 0.362           | 17.619 | 0.076                    | 0.490           | 5.743  |
| EIF3S2    | cg26093687 | 0.040                    | 0.361           | 17.619 | 0.030                    | 0.265           | 28.753 |
| PRB4      | cg14076161 | 0.061                    | 0.361           | 17.619 | 0.067                    | 0.414           | 17.895 |
| OCM       | cg22152667 | 0.016                    | 0.360           | 17.619 | 0.010                    | 0.211           | 35.589 |
| PPP1R3C   | cg09775312 | 0.031                    | 0.359           | 17.619 | 0.037                    | 0.463           | 9.143  |
| IGF2AS    | cg25574024 | 0.083                    | 0.357           | 17.619 | 0.132                    | 0.345           | 19.998 |
| TNFRSF13B | cg18152830 | 0.022                    | 0.357           | 17.619 | 0.024                    | 0.369           | 19.998 |
| OTUB2     | cg22981461 | 0.029                    | 0.357           | 17.619 | 0.038                    | 0.394           | 17.895 |
| KCNA5     | cg24605304 | 0.015                    | 0.357           | 17.619 | 0.016                    | 0.334           | 22.532 |
| AKR1A1    | cg11323731 | 0.014                    | 0.357           | 17.619 | 0.021                    | 0.478           | 5.743  |
| CDH9      | cg19475870 | 0.099                    | 0.354           | 17.619 | 0.101                    | 0.341           | 22.532 |
| MYOD1     | cg24322623 | 0.015                    | 0.351           | 17.619 | 0.014                    | 0.344           | 22.532 |
| PAPPA2    | cg10994126 | 0.061                    | 0.350           | 17.619 | 0.074                    | 0.462           | 9.143  |
| MGC50811  | cg10498097 | 0.033                    | 0.349           | 18.898 | 0.029                    | 0.336           | 22.532 |
| RUNX3     | cg25178645 | 0.010                    | 0.348           | 18.898 | 0.009                    | 0.308           | 22.532 |
| PLSCR2    | cg03075662 | 0.052                    | 0.348           | 18.898 | 0.064                    | 0.415           | 17.895 |
| CHFR      | cg17387870 | 0.057                    | 0.345           | 18.898 | 0.080                    | 0.422           | 17.895 |
| WISP1     | cg03670238 | 0.095                    | 0.345           | 18.898 | 0.124                    | 0.401           | 17.895 |
| APH1B     | cg17207590 | 0.038                    | 0.344           | 18.898 | 0.026                    | 0.310           | 22.532 |
| SSTR1     | cg27590397 | 0.011                    | 0.343           | 18.898 | 0.010                    | 0.389           | 19.998 |
| ZNF124    | cg21918500 | 0.042                    | 0.343           | 18.898 | 0.014                    | 0.348           | 19.998 |
| FLJ21820  | cg02946570 | 0.131                    | 0.342           | 18.898 | 0.160                    | 0.394           | 17.895 |

Note. FDR = false discovery rate (%). Slope = slope of least squared line. Range = range of average beta.
