# Supplementary material
Source: PubMed Central journal article supplement (PMC3235257)
Supplement: NIHMS313621-supplement-Supp_Table_S9.pdf [file NIHMS313621-supplement-Supp_Table_S9.pdf]

**Sup. Table 9:** Correlation between paternal stress during preschool and decreased DNA methylation in girls only (all CpG sites with FDR<20%). Sites with greater than 5% differential methylation are highlighted in grey.

| Gene     | CpG Site   | Slope  | Range | Differential Methylation | Spearman $\rho$ | FDR   |
|----------|------------|--------|-------|--------------------------|-----------------|-------|
| MGC33302 | cg03482087 | -0.076 | 0.101 | -0.054                   | -0.610          | 0.000 |
| LYCAT    | cg10995359 | -0.149 | 0.340 | -0.106                   | -0.576          | 0.000 |
| CHERP    | cg05197908 | -0.032 | 0.043 | -0.023                   | -0.571          | 0.000 |
| FLJ10986 | cg19213569 | -0.036 | 0.055 | -0.026                   | -0.568          | 0.000 |
| STRA13   | cg16375728 | -0.027 | 0.069 | -0.019                   | -0.565          | 0.000 |
| MKRN1    | cg06784339 | -0.079 | 0.144 | -0.056                   | -0.543          | 0.000 |
| LEPRE1   | cg27657283 | -0.042 | 0.046 | -0.029                   | -0.524          | 0.000 |
| MRPL12   | cg22663117 | -0.054 | 0.072 | -0.038                   | -0.516          | 0.000 |
| SERPIND1 | cg02523400 | -0.047 | 0.063 | -0.033                   | -0.513          | 0.000 |
| NAT5     | cg08801329 | -0.018 | 0.035 | -0.013                   | -0.501          | 5.743 |
| GRB10    | cg12903171 | -0.154 | 0.270 | -0.109                   | -0.499          | 5.743 |
| SFRS6    | cg26718122 | -0.106 | 0.184 | -0.075                   | -0.498          | 5.743 |
| RPE      | cg19203504 | -0.053 | 0.101 | -0.038                   | -0.498          | 5.743 |
| TRSPAP1  | cg13857440 | -0.072 | 0.110 | -0.051                   | -0.497          | 5.743 |
| MYNN     | cg18676803 | 0.001  | 0.725 | 0.000                    | -0.497          | 5.743 |
| PSMB6    | cg19921492 | -0.101 | 0.139 | -0.072                   | -0.493          | 5.743 |
| CAPZA1   | cg07003563 | -0.075 | 0.099 | -0.053                   | -0.491          | 5.743 |
| XRN1     | cg25264554 | -0.042 | 0.081 | -0.030                   | -0.489          | 5.743 |
| ABTB1    | cg18353563 | -0.060 | 0.152 | -0.042                   | -0.489          | 5.743 |
| ZNF688   | cg10665018 | -0.069 | 0.118 | -0.049                   | -0.489          | 5.743 |
| LAMC1    | cg10847798 | -0.045 | 0.069 | -0.032                   | -0.487          | 5.743 |
| GPX1     | cg06613840 | -0.091 | 0.240 | -0.064                   | -0.486          | 5.743 |
| SUV420H2 | cg14112945 | -0.079 | 0.115 | -0.056                   | -0.485          | 5.743 |
| OBFC2B   | cg25245322 | -0.025 | 0.072 | -0.018                   | -0.484          | 5.743 |
| RARB     | cg26124016 | -0.033 | 0.057 | -0.023                   | -0.480          | 5.743 |
| FGF11    | cg13492227 | -0.077 | 0.133 | -0.054                   | -0.480          | 5.743 |
| BCDIN3   | cg11979382 | -0.018 | 0.041 | -0.013                   | -0.479          | 5.743 |
| TNFSF9   | cg01186777 | -0.017 | 0.031 | -0.012                   | -0.477          | 5.743 |
| PSMB6    | cg24221059 | -0.040 | 0.065 | -0.029                   | -0.476          | 5.743 |
| DDX5     | cg07387199 | -0.027 | 0.064 | -0.019                   | -0.473          | 5.743 |
| KIAA1822 | cg02867079 | -0.023 | 0.042 | -0.016                   | -0.471          | 5.743 |
| TGFB2    | cg11976166 | -0.122 | 0.254 | -0.086                   | -0.470          | 5.743 |
| ORC2L    | cg16873684 | -0.043 | 0.083 | -0.031                   | -0.469          | 5.743 |
| PYY2     | cg19539519 | -0.035 | 0.059 | -0.025                   | -0.469          | 5.743 |
| RPP25    | cg16914151 | -0.051 | 0.102 | -0.036                   | -0.469          | 5.743 |
| MB       | cg07009002 | -0.071 | 0.133 | -0.050                   | -0.468          | 5.743 |
| COPS2    | cg22873892 | -0.068 | 0.129 | -0.049                   | -0.467          | 5.743 |
| CD4      | cg16470760 | -0.074 | 0.133 | -0.053                   | -0.466          | 5.743 |
| ZNF212   | cg17327630 | -0.035 | 0.065 | -0.025                   | -0.465          | 5.743 |
| NEIL2    | cg14329976 | -0.028 | 0.052 | -0.020                   | -0.462          | 5.743 |
| FAH      | cg05038121 | -0.096 | 0.164 | -0.068                   | -0.461          | 5.743 |
| DUSP4    | cg25751295 | -0.036 | 0.065 | -0.025                   | -0.459          | 5.743 |
| PDE4B    | cg26832142 | -0.036 | 0.105 | -0.025                   | -0.459          | 5.743 |
| CCAR1    | cg14623805 | -0.016 | 0.024 | -0.012                   | -0.456          | 5.743 |
| YIPF1    | cg23061257 | -0.140 | 0.214 | -0.099                   | -0.456          | 5.743 |
| FAM44B   | cg12598575 | -0.013 | 0.058 | -0.009                   | -0.456          | 5.743 |
| SCN2B    | cg26502489 | -0.068 | 0.114 | -0.048                   | -0.456          | 5.743 |
| TGFB2    | cg16658719 | -0.032 | 0.053 | -0.023                   | -0.456          | 5.743 |
| ANP32E   | cg13841804 | -0.035 | 0.067 | -0.025                   | -0.455          | 5.743 |

|           |            |        |       |        |        |       |
|-----------|------------|--------|-------|--------|--------|-------|
| FAM70B    | cg15350194 | -0.029 | 0.056 | -0.021 | -0.453 | 5.743 |
| CCNT1     | cg01082679 | -0.017 | 0.033 | -0.012 | -0.452 | 5.743 |
| SUFU      | cg15109571 | -0.045 | 0.084 | -0.032 | -0.452 | 5.743 |
| CCDC51    | cg25858682 | -0.018 | 0.041 | -0.013 | -0.450 | 5.743 |
| TRA2A     | cg19747852 | -0.037 | 0.054 | -0.027 | -0.450 | 5.743 |
| GLT25D1   | cg22517351 | -0.046 | 0.090 | -0.033 | -0.448 | 5.743 |
| ASNA1     | cg02914419 | -0.038 | 0.065 | -0.027 | -0.447 | 5.743 |
| ATRN      | cg17294081 | -0.024 | 0.047 | -0.017 | -0.447 | 5.743 |
| DYNC1LI2  | cg21610192 | -0.021 | 0.041 | -0.015 | -0.447 | 5.743 |
| SLC22A18  | cg24139421 | -0.010 | 0.025 | -0.007 | -0.446 | 5.743 |
| HMGNI     | cg13791713 | -0.066 | 0.120 | -0.047 | -0.446 | 5.743 |
| ZNF688    | cg01343729 | -0.028 | 0.042 | -0.020 | -0.446 | 5.743 |
| GRP       | cg23357981 | -0.055 | 0.090 | -0.039 | -0.445 | 5.743 |
| H2AFV     | cg24319545 | -0.028 | 0.065 | -0.020 | -0.445 | 5.743 |
| C12orf61  | cg14108394 | -0.027 | 0.042 | -0.019 | -0.445 | 5.743 |
| LRRC23    | cg15411984 | -0.022 | 0.039 | -0.015 | -0.443 | 5.743 |
| SGCB      | cg23653712 | -0.030 | 0.049 | -0.021 | -0.442 | 5.743 |
| ANXA5     | cg03354519 | -0.024 | 0.038 | -0.017 | -0.442 | 7.370 |
| ZIM2      | cg02162069 | -0.114 | 0.347 | -0.081 | -0.441 | 7.370 |
| FOXD3     | cg15462232 | -0.045 | 0.077 | -0.032 | -0.441 | 7.370 |
| PTK7      | cg21663580 | -0.015 | 0.028 | -0.011 | -0.440 | 7.370 |
| RAB39     | cg05090725 | -0.008 | 0.031 | -0.006 | -0.440 | 7.370 |
| WDR37     | cg17947053 | -0.055 | 0.099 | -0.039 | -0.440 | 7.370 |
| C9orf82   | cg25106814 | -0.027 | 0.058 | -0.019 | -0.438 | 7.370 |
| SERBP1    | cg18259391 | -0.058 | 0.090 | -0.041 | -0.438 | 7.370 |
| SLC13A5   | cg22040627 | -0.020 | 0.048 | -0.014 | -0.438 | 7.370 |
| CCNT1     | cg22103585 | -0.011 | 0.026 | -0.007 | -0.437 | 7.370 |
| HIGD1A    | cg11080718 | -0.040 | 0.074 | -0.029 | -0.437 | 7.370 |
| PEBP1     | cg14349467 | -0.045 | 0.121 | -0.032 | -0.435 | 7.370 |
| IL21R     | cg19423311 | -0.119 | 0.331 | -0.085 | -0.435 | 7.370 |
| SEPT11    | cg00899086 | -0.021 | 0.047 | -0.015 | -0.434 | 7.370 |
| RPUSD4    | cg20278498 | -0.067 | 0.111 | -0.047 | -0.434 | 7.370 |
| ERGIC1    | cg15947959 | -0.026 | 0.046 | -0.018 | -0.434 | 7.370 |
| LNPEP     | cg09593402 | -0.044 | 0.095 | -0.031 | -0.434 | 7.370 |
| TMEM42    | cg26889990 | -0.041 | 0.079 | -0.029 | -0.433 | 7.370 |
| KA21      | cg23776012 | -0.117 | 0.194 | -0.083 | -0.433 | 7.370 |
| PPP1CA    | cg11867686 | -0.054 | 0.097 | -0.038 | -0.433 | 7.370 |
| HTLF      | cg00539716 | -0.031 | 0.060 | -0.022 | -0.430 | 7.370 |
| POU2F1    | cg19001490 | -0.042 | 0.064 | -0.030 | -0.430 | 7.370 |
| CDC7      | cg18127191 | -0.025 | 0.042 | -0.018 | -0.430 | 7.370 |
| PRR3      | cg21264055 | -0.031 | 0.056 | -0.022 | -0.430 | 7.370 |
| FBXO28    | cg01610240 | -0.036 | 0.063 | -0.026 | -0.429 | 7.370 |
| SFRS1     | cg24269276 | -0.024 | 0.079 | -0.017 | -0.429 | 7.370 |
| TNFRSF12A | cg16657615 | -0.027 | 0.039 | -0.019 | -0.429 | 7.370 |
| MGC32020  | cg21912241 | -0.089 | 0.139 | -0.063 | -0.429 | 7.370 |
| SEPW1     | cg14058998 | -0.011 | 0.016 | -0.008 | -0.429 | 7.370 |
| GALNT2    | cg13769204 | -0.016 | 0.032 | -0.011 | -0.428 | 7.370 |
| ZNF286    | cg09429185 | -0.026 | 0.040 | -0.018 | -0.427 | 7.370 |
| SFRS2     | cg26815021 | -0.076 | 0.137 | -0.054 | -0.427 | 7.370 |
| SMG6      | cg12946690 | -0.108 | 0.178 | -0.076 | -0.427 | 7.370 |
| ISOC2     | cg09846458 | -0.029 | 0.055 | -0.020 | -0.427 | 7.370 |
| SMOX      | cg26232005 | -0.037 | 0.068 | -0.026 | -0.425 | 7.370 |
| HPR       | cg20672044 | -0.042 | 0.079 | -0.030 | -0.424 | 7.370 |
| CSTF3     | cg19236745 | -0.037 | 0.089 | -0.026 | -0.423 | 7.370 |
| SYNJ2BP   | cg08816248 | -0.032 | 0.069 | -0.022 | -0.422 | 7.370 |
| IGF2AS    | cg12322132 | -0.016 | 0.032 | -0.011 | -0.422 | 7.370 |

|           |            |        |       |        |        |       |
|-----------|------------|--------|-------|--------|--------|-------|
| DCUN1D3   | cg09371142 | -0.057 | 0.118 | -0.040 | -0.421 | 7.370 |
| ZNF514    | cg23721140 | -0.014 | 0.025 | -0.010 | -0.420 | 7.370 |
| WDR6      | cg13415434 | -0.026 | 0.074 | -0.019 | -0.420 | 7.370 |
| EEF2      | cg18064655 | -0.023 | 0.035 | -0.016 | -0.420 | 7.370 |
| FAU       | cg11419863 | -0.017 | 0.027 | -0.012 | -0.420 | 7.370 |
| SCG2      | cg01668465 | -0.028 | 0.084 | -0.020 | -0.420 | 7.370 |
| TRPM4     | cg26623224 | -0.034 | 0.071 | -0.024 | -0.419 | 7.370 |
| SLC13A3   | cg18468842 | -0.094 | 0.176 | -0.066 | -0.418 | 7.370 |
| CREBL1    | cg03298413 | -0.040 | 0.082 | -0.028 | -0.418 | 7.370 |
| ZNF42     | cg10075436 | -0.021 | 0.038 | -0.015 | -0.418 | 7.370 |
| SETDB1    | cg12082615 | -0.016 | 0.027 | -0.011 | -0.418 | 7.370 |
| PRKAG2    | cg05953394 | -0.024 | 0.057 | -0.017 | -0.418 | 7.370 |
| FLNB      | cg13577407 | -0.056 | 0.108 | -0.040 | -0.417 | 7.370 |
| RNF167    | cg14360897 | -0.035 | 0.065 | -0.025 | -0.416 | 7.370 |
| NNAT      | cg23566503 | -0.133 | 0.267 | -0.094 | -0.415 | 7.370 |
| TCEB1     | cg05751979 | -0.025 | 0.049 | -0.018 | -0.414 | 7.370 |
| MGC33302  | cg03883519 | -0.091 | 0.295 | -0.064 | -0.413 | 7.370 |
| FETUB     | cg04458548 | -0.045 | 0.143 | -0.032 | -0.413 | 7.370 |
| RASA4     | cg10274908 | -0.016 | 0.067 | -0.012 | -0.413 | 7.370 |
| GNB2L1    | cg08424427 | -0.047 | 0.091 | -0.033 | -0.412 | 7.370 |
| BHLHB3    | cg19243777 | -0.014 | 0.026 | -0.010 | -0.412 | 7.370 |
| GAD2      | cg04599297 | -0.059 | 0.100 | -0.042 | -0.412 | 7.370 |
| C22orf9   | cg11221513 | -0.017 | 0.031 | -0.012 | -0.411 | 7.370 |
| DNAJB9    | cg20807701 | -0.033 | 0.058 | -0.023 | -0.411 | 7.370 |
| TLE3      | cg08342270 | -0.065 | 0.112 | -0.046 | -0.411 | 7.370 |
| ZDHC6     | cg09688763 | -0.020 | 0.039 | -0.014 | -0.411 | 7.370 |
| PYCRL     | cg15555727 | -0.025 | 0.049 | -0.018 | -0.410 | 7.370 |
| ANP32E    | cg02937060 | -0.053 | 0.104 | -0.037 | -0.410 | 7.370 |
| COMMD1    | cg03532114 | -0.021 | 0.029 | -0.015 | -0.409 | 7.370 |
| CLN6      | cg14610746 | -0.062 | 0.118 | -0.044 | -0.409 | 7.370 |
| IGFBP4    | cg00512374 | -0.017 | 0.037 | -0.012 | -0.408 | 7.370 |
| TBC1D13   | cg18773223 | 0.004  | 0.889 | 0.003  | -0.407 | 7.370 |
| ADM       | cg12320306 | -0.020 | 0.048 | -0.014 | -0.407 | 7.370 |
| FLJ12118  | cg15270851 | -0.027 | 0.052 | -0.019 | -0.407 | 7.370 |
| DVL2      | cg25432997 | -0.056 | 0.103 | -0.040 | -0.407 | 7.370 |
| CD59      | cg20656116 | -0.027 | 0.049 | -0.019 | -0.407 | 7.370 |
| C13orf25  | cg25308542 | -0.039 | 0.079 | -0.028 | -0.406 | 7.370 |
| SSPN      | cg24509668 | -0.043 | 0.093 | -0.030 | -0.406 | 7.370 |
| ICA1      | cg15413566 | -0.053 | 0.115 | -0.038 | -0.405 | 7.370 |
| EML2      | cg20427879 | -0.050 | 0.080 | -0.035 | -0.405 | 7.370 |
| SLC35F5   | cg15872103 | -0.028 | 0.059 | -0.020 | -0.405 | 7.370 |
| PEG3      | cg14849423 | -0.094 | 0.206 | -0.067 | -0.404 | 7.370 |
| C20orf133 | cg23751724 | -0.064 | 0.148 | -0.046 | -0.404 | 7.370 |
| KIAA1434  | cg26942392 | -0.040 | 0.105 | -0.029 | -0.404 | 9.143 |
| DNAJC18   | cg19238398 | -0.062 | 0.119 | -0.044 | -0.404 | 9.143 |
| SYT10     | cg00902195 | -0.025 | 0.048 | -0.018 | -0.403 | 9.143 |
| TNK2      | cg21008828 | -0.025 | 0.073 | -0.018 | -0.403 | 9.143 |
| ALPL      | cg23352747 | -0.045 | 0.076 | -0.032 | -0.403 | 9.143 |
| FEM1A     | cg16118817 | -0.081 | 0.203 | -0.058 | -0.403 | 9.143 |
| DNAJC18   | cg18805835 | -0.079 | 0.178 | -0.056 | -0.402 | 9.143 |
| PPFIBP1   | cg06058319 | -0.026 | 0.041 | -0.018 | -0.402 | 9.143 |
| PER1      | cg01980637 | -0.014 | 0.032 | -0.010 | -0.401 | 9.143 |
| RCOR1     | cg08707819 | -0.109 | 0.199 | -0.077 | -0.401 | 9.143 |
| B4GALT2   | cg15379237 | -0.018 | 0.028 | -0.013 | -0.401 | 9.143 |
| HEL308    | cg22541143 | -0.105 | 0.248 | -0.074 | -0.401 | 9.143 |
| BCDIN3    | cg16049587 | -0.041 | 0.084 | -0.029 | -0.400 | 9.143 |

|          |            |        |       |        |        |       |
|----------|------------|--------|-------|--------|--------|-------|
| C6orf1   | cg06247172 | -0.017 | 0.050 | -0.012 | -0.400 | 9.143 |
| BET1     | cg20831492 | -0.031 | 0.068 | -0.022 | -0.400 | 9.143 |
| MGC72075 | cg01758870 | -0.055 | 0.126 | -0.039 | -0.399 | 9.143 |
| LMNB1    | cg23953133 | -0.034 | 0.078 | -0.024 | -0.399 | 9.143 |
| SOX21    | cg19063972 | -0.005 | 0.029 | -0.003 | -0.398 | 9.143 |
| KRT25A   | cg18901980 | -0.087 | 0.255 | -0.062 | -0.398 | 9.143 |
| YWHAZ    | cg07981588 | -0.033 | 0.067 | -0.024 | -0.397 | 9.143 |
| ZNF512   | cg18611281 | -0.043 | 0.088 | -0.030 | -0.397 | 9.143 |
| GPATC3   | cg21680178 | -0.055 | 0.103 | -0.039 | -0.397 | 9.143 |
| ST13     | cg17660026 | -0.096 | 0.155 | -0.068 | -0.397 | 9.143 |
| MLL5     | cg10488185 | -0.024 | 0.040 | -0.017 | -0.396 | 9.143 |
| QKI      | cg09339301 | -0.026 | 0.049 | -0.018 | -0.396 | 9.143 |
| CRMP1    | cg22680204 | -0.033 | 0.046 | -0.024 | -0.396 | 9.143 |
| TEKT1    | cg12685753 | -0.040 | 0.088 | -0.029 | -0.395 | 9.143 |
| BM88     | cg09553358 | -0.020 | 0.037 | -0.014 | -0.395 | 9.143 |
| ANKS3    | cg03859282 | -0.072 | 0.160 | -0.051 | -0.395 | 9.143 |
| PCGF3    | cg21660727 | -0.034 | 0.100 | -0.024 | -0.395 | 9.143 |
| GJB4     | cg15750705 | -0.027 | 0.048 | -0.019 | -0.395 | 9.143 |
| RPS6KA4  | cg22833292 | -0.020 | 0.049 | -0.014 | -0.395 | 9.143 |
| EEF1A1   | cg01536980 | -0.028 | 0.063 | -0.020 | -0.395 | 9.143 |
| DGKZ     | cg18765542 | -0.061 | 0.151 | -0.043 | -0.395 | 9.143 |
| FBXW7    | cg05287690 | -0.052 | 0.114 | -0.037 | -0.394 | 9.143 |
| ARV1     | cg02844629 | -0.032 | 0.069 | -0.023 | -0.394 | 9.143 |
| KCNIP2   | cg04997967 | -0.038 | 0.104 | -0.027 | -0.393 | 9.143 |
| DNAI2    | cg11856697 | -0.051 | 0.096 | -0.036 | -0.393 | 9.143 |
| CDC6     | cg19479366 | -0.161 | 0.777 | -0.114 | -0.393 | 9.143 |
| CRLF1    | cg12970724 | -0.063 | 0.123 | -0.045 | -0.393 | 9.143 |
| LOC51315 | cg12885244 | -0.029 | 0.108 | -0.020 | -0.393 | 9.143 |
| VAPB     | cg17755581 | -0.043 | 0.083 | -0.030 | -0.392 | 9.143 |
| DULLARD  | cg11566939 | -0.027 | 0.052 | -0.019 | -0.392 | 9.143 |
| WBSCR23  | cg12240237 | -0.046 | 0.086 | -0.033 | -0.392 | 9.143 |
| ZNF559   | cg26674132 | -0.087 | 0.147 | -0.061 | -0.392 | 9.143 |
| APC      | cg24332422 | -0.038 | 0.080 | -0.027 | -0.392 | 9.143 |
| SERAC1   | cg06659073 | -0.052 | 0.096 | -0.037 | -0.391 | 9.143 |
| PIGO     | cg04065065 | -0.071 | 0.154 | -0.050 | -0.391 | 9.143 |
| HOXC5    | cg15700739 | -0.063 | 0.110 | -0.044 | -0.391 | 9.143 |
| HDGF     | cg00746981 | -0.014 | 0.874 | -0.010 | -0.391 | 9.143 |
| PCK2     | cg15467148 | -0.038 | 0.066 | -0.027 | -0.390 | 9.143 |
| C1orf21  | cg05135156 | -0.024 | 0.042 | -0.017 | -0.389 | 9.143 |
| PEG10    | cg16492735 | -0.073 | 0.274 | -0.052 | -0.388 | 9.143 |
| UBE4B    | cg08151470 | -0.110 | 0.246 | -0.078 | -0.388 | 9.143 |
| FAM73B   | cg00729541 | -0.013 | 0.027 | -0.009 | -0.388 | 9.143 |
| TPM4     | cg16232979 | -0.020 | 0.041 | -0.014 | -0.388 | 9.143 |
| ALOXE3   | cg10392768 | -0.030 | 0.046 | -0.021 | -0.388 | 9.143 |
| EEF1A1   | cg07740989 | -0.019 | 0.047 | -0.014 | -0.387 | 9.143 |
| MSMB     | cg17030820 | -0.019 | 0.040 | -0.014 | -0.387 | 9.143 |
| KNDC1    | cg12955583 | -0.027 | 0.094 | -0.019 | -0.387 | 9.143 |
| MGC34646 | cg22915732 | -0.052 | 0.096 | -0.037 | -0.387 | 9.143 |
| GM2A     | cg22775896 | -0.014 | 0.035 | -0.010 | -0.387 | 9.143 |
| C14orf58 | cg23575320 | -0.030 | 0.047 | -0.021 | -0.387 | 9.143 |
| FLJ22746 | cg24516901 | -0.271 | 0.506 | -0.192 | -0.386 | 9.143 |
| PNPLA2   | cg22016649 | -0.030 | 0.072 | -0.021 | -0.386 | 9.143 |
| LRIG2    | cg10983720 | -0.018 | 0.038 | -0.013 | -0.385 | 9.143 |
| SNX4     | cg16468910 | -0.069 | 0.118 | -0.049 | -0.385 | 9.143 |
| NNAT     | cg10642330 | -0.166 | 0.321 | -0.118 | -0.385 | 9.143 |
| OBFC2B   | cg17709466 | -0.015 | 0.033 | -0.011 | -0.385 | 9.143 |

|           |            |        |       |        |        |       |
|-----------|------------|--------|-------|--------|--------|-------|
| TTC16     | cg21753834 | -0.025 | 0.074 | -0.018 | -0.385 | 9.143 |
| TMEM111   | cg18215716 | -0.046 | 0.075 | -0.033 | -0.384 | 9.143 |
| COX6A1    | cg08821669 | -0.025 | 0.067 | -0.018 | -0.384 | 9.143 |
| CHMP4B    | cg02435593 | -0.092 | 0.160 | -0.065 | -0.384 | 9.143 |
| ATP2C1    | cg09134747 | -0.109 | 0.215 | -0.078 | -0.384 | 9.143 |
| SMU1      | cg24088229 | -0.042 | 0.093 | -0.030 | -0.384 | 9.143 |
| FRMD5     | cg16046465 | -0.018 | 0.035 | -0.013 | -0.384 | 9.143 |
| RIC8B     | cg26979339 | -0.013 | 0.044 | -0.009 | -0.384 | 9.143 |
| KIF3C     | cg00094851 | -0.037 | 0.095 | -0.027 | -0.384 | 9.143 |
| GNAS      | cg27027803 | -0.061 | 0.214 | -0.043 | -0.383 | 9.143 |
| RCBTB2    | cg25165199 | -0.123 | 0.277 | -0.088 | -0.383 | 9.143 |
| SACM1L    | cg26864061 | -0.021 | 0.088 | -0.015 | -0.383 | 9.143 |
| DNM2      | cg20041257 | -0.034 | 0.091 | -0.024 | -0.382 | 9.143 |
| E2F4      | cg05501658 | -0.025 | 0.068 | -0.018 | -0.382 | 9.143 |
| FAHD2A    | cg08818385 | -0.101 | 0.258 | -0.071 | -0.382 | 9.143 |
| SLC2A8    | cg03804985 | -0.038 | 0.085 | -0.027 | -0.382 | 9.143 |
| TSFM      | cg06191990 | -0.074 | 0.121 | -0.053 | -0.382 | 9.143 |
| KREMEN2   | cg20712430 | -0.028 | 0.072 | -0.020 | -0.382 | 9.143 |
| URB       | cg21307628 | -0.041 | 0.077 | -0.029 | -0.381 | 9.143 |
| CCND2     | cg16994506 | -0.055 | 0.096 | -0.039 | -0.381 | 9.143 |
| ZNF691    | cg10040059 | -0.051 | 0.090 | -0.036 | -0.381 | 9.143 |
| TCF12     | cg12426141 | -0.030 | 0.060 | -0.021 | -0.381 | 9.143 |
| ING2      | cg16420530 | -0.015 | 0.035 | -0.011 | -0.381 | 9.143 |
| COL1A1    | cg01593886 | -0.045 | 0.079 | -0.032 | -0.380 | 9.143 |
| LEMD3     | cg03217102 | -0.030 | 0.074 | -0.021 | -0.380 | 9.143 |
| DMTF1     | cg19861697 | -0.042 | 0.072 | -0.030 | -0.380 | 9.143 |
| ASAH1     | cg03201604 | -0.013 | 0.053 | -0.009 | -0.379 | 9.143 |
| STXBP5    | cg05360265 | -0.026 | 0.083 | -0.019 | -0.379 | 9.143 |
| BPESC1    | cg03552688 | -0.041 | 0.083 | -0.029 | -0.379 | 9.143 |
| BTG4      | cg23211240 | -0.028 | 0.085 | -0.020 | -0.379 | 9.143 |
| UNC84B    | cg20652889 | -0.017 | 0.032 | -0.012 | -0.379 | 9.143 |
| AADAT     | cg01654582 | -0.027 | 0.070 | -0.019 | -0.378 | 9.143 |
| GNAS      | cg24975842 | -0.074 | 0.207 | -0.052 | -0.378 | 9.143 |
| NRP2      | cg22367989 | -0.024 | 0.043 | -0.017 | -0.378 | 9.143 |
| PDCD7     | cg25026754 | -0.015 | 0.028 | -0.010 | -0.378 | 9.143 |
| E2F6      | cg12858075 | -0.016 | 0.036 | -0.012 | -0.378 | 9.143 |
| CLPP      | cg17756392 | -0.016 | 0.030 | -0.011 | -0.378 | 9.143 |
| BDH2      | cg02214188 | -0.169 | 0.287 | -0.120 | -0.377 | 9.143 |
| RCBTB1    | cg15609273 | -0.020 | 0.044 | -0.014 | -0.377 | 9.143 |
| MARVELD3  | cg18468219 | -0.013 | 0.032 | -0.009 | -0.377 | 9.143 |
| TGFB2     | cg14910241 | 0.025  | 0.779 | 0.018  | -0.377 | 9.143 |
| ZIM2      | cg22354595 | -0.096 | 0.168 | -0.068 | -0.377 | 9.143 |
| C20orf116 | cg08661003 | -0.043 | 0.068 | -0.031 | -0.377 | 9.143 |
| PHF5A     | cg08759274 | -0.041 | 0.101 | -0.029 | -0.376 | 9.143 |
| FN3K      | cg21697134 | -0.021 | 0.071 | -0.015 | -0.376 | 9.143 |
| C5orf16   | cg11064797 | -0.020 | 0.041 | -0.014 | -0.376 | 9.143 |
| MS4A6A    | cg04353769 | -0.056 | 0.120 | -0.040 | -0.376 | 9.143 |
| ROM1      | cg01858173 | -0.019 | 0.030 | -0.013 | -0.376 | 9.143 |
| EDF1      | cg17185543 | -0.075 | 0.125 | -0.053 | -0.376 | 9.143 |
| PMM1      | cg04384398 | -0.054 | 0.123 | -0.038 | -0.375 | 9.143 |
| TYRO3     | cg01050433 | -0.050 | 0.127 | -0.035 | -0.375 | 9.143 |
| MMRN2     | cg22545356 | -0.033 | 0.096 | -0.023 | -0.375 | 9.143 |
| FAM104A   | cg12569173 | -0.030 | 0.054 | -0.021 | -0.374 | 9.143 |
| HIST1H3A  | cg09305770 | -0.017 | 0.037 | -0.012 | -0.375 | 9.143 |
| PDIA3     | cg03377682 | -0.037 | 0.080 | -0.027 | -0.374 | 9.143 |
| C1orf126  | cg24535573 | -0.022 | 0.059 | -0.016 | -0.374 | 9.143 |

|          |            |        |       |        |        |        |
|----------|------------|--------|-------|--------|--------|--------|
| FLJ44861 | cg26717786 | -0.041 | 0.139 | -0.029 | -0.374 | 9.143  |
| NS4ATP2  | cg09545860 | -0.036 | 0.069 | -0.026 | -0.374 | 9.143  |
| KCNC2    | cg11631518 | -0.029 | 0.059 | -0.020 | -0.374 | 9.143  |
| CLSPN    | cg06100291 | -0.021 | 0.037 | -0.015 | -0.373 | 9.143  |
| BRPF1    | cg14712964 | -0.029 | 0.080 | -0.021 | -0.373 | 9.143  |
| CDV3     | cg08860710 | -0.037 | 0.064 | -0.026 | -0.373 | 9.143  |
| C13orf10 | cg21306212 | -0.029 | 0.068 | -0.020 | -0.373 | 9.143  |
| CHRAC1   | cg12002314 | -0.015 | 0.034 | -0.011 | -0.373 | 9.143  |
| DLG1     | cg12149391 | -0.023 | 0.050 | -0.016 | -0.372 | 11.730 |
| ZFHX1B   | cg07246225 | -0.034 | 0.063 | -0.024 | -0.372 | 11.730 |
| MRPL12   | cg15214092 | -0.071 | 0.155 | -0.050 | -0.371 | 11.730 |
| KRAS     | cg02850821 | -0.027 | 0.075 | -0.019 | -0.371 | 11.730 |
| RENT1    | cg06214729 | -0.017 | 0.037 | -0.012 | -0.371 | 11.730 |
| TRAPPC4  | cg11054882 | -0.041 | 0.090 | -0.029 | -0.371 | 11.730 |
| STAC     | cg01798589 | -0.038 | 0.072 | -0.027 | -0.371 | 11.730 |
| ARHGAP29 | cg26229607 | -0.100 | 0.180 | -0.071 | -0.371 | 11.730 |
| APBB3    | cg02995853 | -0.018 | 0.035 | -0.013 | -0.371 | 11.730 |
| ZNF688   | cg27586455 | -0.020 | 0.045 | -0.014 | -0.371 | 11.730 |
| SAT2     | cg01249910 | -0.019 | 0.037 | -0.014 | -0.370 | 11.730 |
| GRB2     | cg09509576 | -0.040 | 0.077 | -0.028 | -0.370 | 11.730 |
| EIF3S5   | cg12510755 | -0.101 | 0.231 | -0.071 | -0.370 | 11.730 |
| EVI1     | cg19848683 | -0.019 | 0.042 | -0.013 | -0.370 | 11.730 |
| MYL9     | cg21671476 | -0.067 | 0.151 | -0.048 | -0.370 | 11.730 |
| SORCS3   | cg09551147 | -0.018 | 0.042 | -0.013 | -0.370 | 11.730 |
| DACH1    | cg19756611 | -0.059 | 0.439 | -0.042 | -0.369 | 11.730 |
| GNAS     | cg21988465 | -0.083 | 0.135 | -0.059 | -0.369 | 11.730 |
| GRASP    | cg04034767 | -0.043 | 0.088 | -0.030 | -0.369 | 11.730 |
| FLJ36980 | cg14501253 | -0.026 | 0.039 | -0.018 | -0.368 | 11.730 |
| RPS2     | cg21862373 | -0.021 | 0.061 | -0.015 | -0.368 | 11.730 |
| MAPK13   | cg24155668 | -0.021 | 0.038 | -0.015 | -0.368 | 11.730 |
| ARRB2    | cg23779331 | -0.020 | 0.053 | -0.014 | -0.367 | 11.730 |
| GTF2A2   | cg24088751 | -0.018 | 0.060 | -0.012 | -0.367 | 11.730 |
| CAV1     | cg27242945 | -0.010 | 0.020 | -0.007 | -0.367 | 11.730 |
| ATXN2L   | cg12360373 | -0.019 | 0.043 | -0.013 | -0.366 | 11.730 |
| CNN2     | cg22902083 | -0.026 | 0.080 | -0.019 | -0.366 | 11.730 |
| RAB26    | cg27176536 | -0.052 | 0.130 | -0.037 | -0.366 | 11.730 |
| FAM71C   | cg13338132 | -0.023 | 0.048 | -0.017 | -0.366 | 11.730 |
| INHBB    | cg07197823 | -0.025 | 0.063 | -0.018 | -0.366 | 11.730 |
| ACAT1    | cg24341800 | -0.085 | 0.282 | -0.060 | -0.365 | 11.730 |
| RGS19    | cg24513045 | -0.040 | 0.105 | -0.028 | -0.365 | 11.730 |
| NFATC1   | cg06973760 | -0.016 | 0.047 | -0.011 | -0.365 | 11.730 |
| HSPC268  | cg02096656 | -0.074 | 0.155 | -0.053 | -0.365 | 11.730 |
| POLR3D   | cg09037858 | -0.033 | 0.062 | -0.024 | -0.365 | 11.730 |
| NMI      | cg15747933 | -0.040 | 0.066 | -0.029 | -0.364 | 11.730 |
| KIF27    | cg09697386 | -0.019 | 0.052 | -0.013 | -0.364 | 11.730 |
| CTTN     | cg15383392 | -0.030 | 0.065 | -0.021 | -0.364 | 11.730 |
| APP      | cg13169373 | -0.016 | 0.038 | -0.012 | -0.364 | 11.730 |
| OSBP     | cg22093158 | -0.027 | 0.090 | -0.019 | -0.364 | 11.730 |
| HDAC11   | cg22319470 | -0.023 | 0.061 | -0.017 | -0.364 | 11.730 |
| SLC1A6   | cg16377872 | -0.061 | 0.142 | -0.043 | -0.363 | 11.730 |
| NFKBIE   | cg01708236 | -0.050 | 0.214 | -0.035 | -0.363 | 11.730 |
| C1orf83  | cg10362426 | -0.020 | 0.066 | -0.014 | -0.363 | 11.730 |
| ZBED3    | cg04735745 | -0.025 | 0.055 | -0.017 | -0.363 | 11.730 |
| HYPK     | cg00480356 | -0.147 | 0.344 | -0.104 | -0.363 | 11.730 |
| CDC7     | cg23845507 | -0.015 | 0.028 | -0.011 | -0.363 | 11.730 |
| LOC51315 | cg26602920 | -0.041 | 0.065 | -0.029 | -0.363 | 11.730 |

|            |            |        |       |        |        |        |
|------------|------------|--------|-------|--------|--------|--------|
| GNAS       | cg07284407 | -0.105 | 0.163 | -0.075 | -0.363 | 11.730 |
| CRISPLD1   | cg05624932 | -0.022 | 0.041 | -0.016 | -0.363 | 11.730 |
| CHEK2      | cg22585269 | -0.055 | 0.074 | -0.039 | -0.363 | 11.730 |
| ORMDL3     | cg01482279 | -0.016 | 0.043 | -0.012 | -0.363 | 11.730 |
| ST14       | cg10089145 | -0.020 | 0.034 | -0.014 | -0.363 | 11.730 |
| DUS2L      | cg17982504 | -0.012 | 0.028 | -0.009 | -0.362 | 11.730 |
| RALB       | cg17169613 | -0.044 | 0.095 | -0.031 | -0.362 | 11.730 |
| NICN1      | cg19866103 | -0.020 | 0.038 | -0.014 | -0.362 | 11.730 |
| PTP4A2     | cg06397510 | -0.006 | 0.059 | -0.004 | -0.362 | 11.730 |
| LEO1       | cg00060762 | -0.019 | 0.052 | -0.013 | -0.362 | 11.730 |
| MAX        | cg13555543 | -0.020 | 0.058 | -0.014 | -0.361 | 11.730 |
| TFEB       | cg03446863 | -0.025 | 0.046 | -0.018 | -0.361 | 11.730 |
| ANKRA2     | cg10237911 | -0.116 | 0.294 | -0.082 | -0.361 | 11.730 |
| LILRB2     | cg19279346 | -0.090 | 0.186 | -0.064 | -0.361 | 11.730 |
| SNAPC1     | cg15860839 | -0.070 | 0.146 | -0.050 | -0.361 | 11.730 |
| TBL2       | cg22511633 | -0.016 | 0.042 | -0.011 | -0.361 | 11.730 |
| PAK4       | cg07186707 | -0.039 | 0.073 | -0.027 | -0.361 | 11.730 |
| SH3TC1     | cg02635407 | -0.034 | 0.069 | -0.024 | -0.361 | 11.730 |
| RPL34      | cg16525761 | -0.042 | 0.090 | -0.030 | -0.361 | 11.730 |
| LOC51035   | cg22091798 | -0.010 | 0.022 | -0.007 | -0.360 | 11.730 |
| TES        | cg00453193 | -0.016 | 0.043 | -0.012 | -0.360 | 11.730 |
| RBM16      | cg12897370 | -0.030 | 0.063 | -0.021 | -0.360 | 11.730 |
| C6orf79    | cg23528708 | -0.026 | 0.059 | -0.019 | -0.360 | 11.730 |
| LY96       | cg23732024 | -0.082 | 0.235 | -0.058 | -0.360 | 11.730 |
| PLEKHK1    | cg09941381 | -0.028 | 0.073 | -0.020 | -0.359 | 11.730 |
| IL15RA     | cg08497766 | -0.032 | 0.080 | -0.023 | -0.359 | 11.730 |
| FIGN       | cg20959523 | -0.022 | 0.041 | -0.015 | -0.359 | 11.730 |
| GLP1R      | cg25014318 | -0.034 | 0.079 | -0.024 | -0.359 | 11.730 |
| ZC3H12A    | cg15949277 | -0.022 | 0.056 | -0.016 | -0.359 | 11.730 |
| LMTK2      | cg05526376 | -0.017 | 0.048 | -0.012 | -0.359 | 11.730 |
| FAM29A     | cg13739345 | -0.026 | 0.061 | -0.018 | -0.359 | 11.730 |
| RASSF5     | cg24450312 | -0.073 | 0.119 | -0.052 | -0.359 | 11.730 |
| SYT11      | cg05150177 | -0.013 | 0.037 | -0.009 | -0.358 | 11.730 |
| M6PRBP1    | cg03020271 | -0.035 | 0.071 | -0.025 | -0.358 | 11.730 |
| MAP2K2     | cg24748945 | -0.060 | 0.114 | -0.043 | -0.358 | 11.730 |
| CD40       | cg21601405 | -0.221 | 0.351 | -0.156 | -0.358 | 11.730 |
| FLJ12505   | cg03455458 | -0.020 | 0.050 | -0.014 | -0.357 | 11.730 |
| ARHGEF1    | cg03161839 | -0.039 | 0.098 | -0.027 | -0.357 | 11.730 |
| RPS13      | cg05592434 | -0.048 | 0.109 | -0.034 | -0.357 | 11.730 |
| KHK        | cg01522194 | -0.015 | 0.052 | -0.010 | -0.357 | 11.730 |
| KM-HN-1    | cg22385477 | 0.062  | 0.918 | 0.044  | -0.357 | 11.730 |
| UBE2J2     | cg03322129 | -0.027 | 0.071 | -0.019 | -0.357 | 11.730 |
| KCNH4      | cg23559331 | -0.025 | 0.076 | -0.018 | -0.357 | 11.730 |
| ARID1A     | cg11856093 | -0.022 | 0.067 | -0.016 | -0.356 | 11.730 |
| MATN2      | cg16202564 | -0.040 | 0.082 | -0.028 | -0.356 | 11.730 |
| SFRS2      | cg00953277 | -0.020 | 0.048 | -0.014 | -0.356 | 11.730 |
| MTX1       | cg06237414 | -0.014 | 0.039 | -0.010 | -0.356 | 11.730 |
| NUDT9      | cg21298523 | -0.042 | 0.091 | -0.030 | -0.356 | 11.730 |
| AKT2       | cg22973042 | -0.048 | 0.069 | -0.034 | -0.356 | 11.730 |
| HNRPA2B1   | cg19062098 | -0.011 | 0.032 | -0.008 | -0.356 | 11.730 |
| PTCH       | cg18436172 | -0.040 | 0.086 | -0.029 | -0.355 | 11.730 |
| CDH13      | cg00806490 | -0.045 | 0.087 | -0.032 | -0.355 | 11.730 |
| LTB        | cg18656170 | -0.052 | 0.095 | -0.037 | -0.355 | 11.730 |
| TMTC3      | cg07520161 | -0.021 | 0.044 | -0.015 | -0.355 | 11.730 |
| SMPDL3A    | cg14426525 | -0.043 | 0.101 | -0.030 | -0.355 | 11.730 |
| DKFZP586H2 | cg14542839 | -0.027 | 0.061 | -0.019 | -0.355 | 11.730 |

123

|           |            |        |       |        |        |        |
|-----------|------------|--------|-------|--------|--------|--------|
| GPC6      | cg16792800 | -0.026 | 0.057 | -0.018 | -0.355 | 11.730 |
| ESRRA     | cg23073111 | -0.045 | 0.152 | -0.032 | -0.354 | 11.730 |
| UFD1L     | cg25841091 | -0.022 | 0.043 | -0.015 | -0.354 | 11.730 |
| LSM4      | cg21664310 | -0.028 | 0.070 | -0.020 | -0.354 | 11.730 |
| HIST1H2BE | cg21146268 | -0.021 | 0.067 | -0.015 | -0.354 | 11.730 |
| KIAA0082  | cg11649001 | -0.019 | 0.036 | -0.013 | -0.354 | 11.730 |
| HIST1H3A  | cg08797106 | -0.065 | 0.123 | -0.046 | -0.354 | 11.730 |
| ZNF416    | cg01947224 | -0.015 | 0.025 | -0.011 | -0.353 | 11.730 |
| TP53AP1   | cg15652797 | -0.022 | 0.045 | -0.015 | -0.353 | 11.730 |
| LRPPRC    | cg26538116 | -0.073 | 0.210 | -0.052 | -0.353 | 11.730 |
| TACC3     | cg13225039 | -0.030 | 0.078 | -0.021 | -0.353 | 11.730 |
| RPS3A     | cg03771255 | -0.031 | 0.059 | -0.022 | -0.353 | 11.730 |
| COL22A1   | cg03396229 | -0.041 | 0.075 | -0.029 | -0.352 | 11.730 |
| MORF4L1   | cg14426682 | -0.065 | 0.143 | -0.046 | -0.352 | 11.730 |
| ATXN3     | cg09458170 | -0.031 | 0.050 | -0.022 | -0.352 | 11.730 |
| SERPINB12 | cg11435943 | -0.038 | 0.117 | -0.027 | -0.351 | 11.730 |
| MGC14141  | cg06654447 | -0.012 | 0.026 | -0.008 | -0.351 | 11.730 |
| RSPO2     | cg14070647 | -0.029 | 0.084 | -0.021 | -0.351 | 11.730 |
| KIAA1822  | cg06834875 | -0.018 | 0.043 | -0.013 | -0.351 | 11.730 |
| SLC25A17  | cg23013931 | -0.011 | 0.033 | -0.008 | -0.351 | 11.730 |
| ACSL1     | cg16092956 | -0.015 | 0.028 | -0.011 | -0.351 | 11.730 |
| VAV2      | cg13134662 | -0.040 | 0.138 | -0.029 | -0.351 | 11.730 |
| BAALC     | cg10918202 | -0.040 | 0.109 | -0.028 | -0.351 | 11.730 |
| C9orf9    | cg24293567 | -0.034 | 0.110 | -0.024 | -0.351 | 11.730 |
| SNURF     | cg02125271 | -0.116 | 0.248 | -0.082 | -0.350 | 11.730 |
| CCM2      | cg22037919 | -0.022 | 0.049 | -0.015 | -0.350 | 11.730 |
| FBXO28    | cg26043391 | -0.045 | 0.082 | -0.032 | -0.350 | 11.730 |
| OBFC2B    | cg22591065 | -0.027 | 0.051 | -0.019 | -0.350 | 11.730 |
| DUSP8     | cg02271621 | -0.101 | 0.158 | -0.071 | -0.350 | 11.730 |
| GGN       | cg26853640 | -0.017 | 0.041 | -0.012 | -0.350 | 11.730 |
| MUC1      | cg07399355 | -0.017 | 0.041 | -0.012 | -0.350 | 11.730 |
| IFIT1     | cg15019617 | -0.032 | 0.087 | -0.022 | -0.349 | 11.730 |
| KCTD17    | cg20011794 | -0.034 | 0.070 | -0.024 | -0.349 | 11.730 |
| AMPD3     | cg08035082 | -0.065 | 0.173 | -0.046 | -0.349 | 11.730 |
| SPATA3    | cg03386373 | -0.057 | 0.119 | -0.040 | -0.349 | 11.730 |
| SOCS2     | cg24117442 | -0.027 | 0.055 | -0.019 | -0.349 | 11.730 |
| IIP45     | cg23355725 | -0.011 | 0.033 | -0.008 | -0.349 | 11.730 |
| CDK5RAP1  | cg12431699 | -0.029 | 0.064 | -0.021 | -0.348 | 11.730 |
| SLC35D1   | cg14206730 | -0.013 | 0.029 | -0.009 | -0.348 | 11.730 |
| EVI5L     | cg14106632 | -0.036 | 0.066 | -0.026 | -0.348 | 11.730 |
| SSPN      | cg19574623 | -0.053 | 0.098 | -0.038 | -0.348 | 11.730 |
| TAF5L     | cg18220284 | -0.012 | 0.026 | -0.008 | -0.348 | 11.730 |
| AMOTL2    | cg08115510 | -0.021 | 0.038 | -0.015 | -0.347 | 11.730 |
| CDH10     | cg07290435 | -0.087 | 0.137 | -0.062 | -0.347 | 11.730 |
| GPR132    | cg26514492 | -0.118 | 0.238 | -0.084 | -0.347 | 11.730 |
| PRKCA     | cg00050312 | -0.015 | 0.045 | -0.011 | -0.347 | 11.730 |
| IGF2BP2   | cg24450631 | -0.054 | 0.128 | -0.038 | -0.347 | 11.730 |
| ATG16L1   | cg04712018 | -0.041 | 0.079 | -0.029 | -0.346 | 11.730 |
| KIRREL    | cg26928603 | -0.066 | 0.138 | -0.046 | -0.346 | 11.730 |
| GABRA4    | cg03593419 | -0.029 | 0.051 | -0.021 | -0.346 | 11.730 |
| PLCXD2    | cg01745657 | -0.104 | 0.193 | -0.074 | -0.346 | 11.730 |
| SUPT3H    | cg11806749 | -0.015 | 0.033 | -0.010 | -0.346 | 11.730 |
| NFE2L3    | cg14534464 | -0.018 | 0.067 | -0.013 | -0.346 | 11.730 |
| MEIS3     | cg21145624 | -0.028 | 0.056 | -0.020 | -0.345 | 11.730 |
| C14orf10  | cg00049986 | -0.114 | 0.234 | -0.081 | -0.345 | 11.730 |



|           |            |        |       |        |        |        |
|-----------|------------|--------|-------|--------|--------|--------|
| MAN1C1    | cg05670408 | -0.022 | 0.106 | -0.015 | -0.345 | 11.730 |
| WDR55     | cg06177968 | -0.028 | 0.059 | -0.020 | -0.345 | 11.730 |
| DHTKD1    | cg14461963 | -0.016 | 0.036 | -0.011 | -0.345 | 11.730 |
| SLC22A8   | cg21062347 | -0.063 | 0.220 | -0.045 | -0.345 | 13.672 |
| BTG1      | cg04211745 | -0.021 | 0.033 | -0.015 | -0.344 | 13.672 |
| MRPL45    | cg17138359 | -0.020 | 0.050 | -0.014 | -0.344 | 13.672 |
| LOC129285 | cg24076392 | -0.017 | 0.043 | -0.012 | -0.344 | 13.672 |
| RUFY1     | cg25418748 | -0.022 | 0.151 | -0.015 | -0.344 | 13.672 |
| DDX59     | cg13945069 | -0.017 | 0.042 | -0.012 | -0.344 | 13.672 |
| DMAP1     | cg23451311 | -0.029 | 0.055 | -0.020 | -0.344 | 13.672 |
| ARMC7     | cg03605339 | -0.022 | 0.042 | -0.016 | -0.344 | 13.672 |
| NFKBIL1   | cg26991292 | -0.057 | 0.192 | -0.040 | -0.343 | 13.672 |
| C12orf26  | cg02845923 | -0.045 | 0.121 | -0.032 | -0.343 | 13.672 |
| CALCOCO2  | cg07460665 | -0.090 | 0.187 | -0.064 | -0.343 | 13.672 |
| RER1      | cg13014406 | -0.014 | 0.024 | -0.010 | -0.343 | 13.672 |
| FMO3      | cg18063149 | -0.040 | 0.076 | -0.028 | -0.343 | 13.672 |
| HRB       | cg19850163 | -0.030 | 0.054 | -0.021 | -0.343 | 13.672 |
| ACTL7A    | cg11628026 | -0.025 | 0.049 | -0.018 | -0.343 | 13.672 |
| ZNF415    | cg24892510 | -0.011 | 0.024 | -0.008 | -0.342 | 13.672 |
| DMP1      | cg22416721 | -0.029 | 0.114 | -0.020 | -0.342 | 13.672 |
| MPP2      | cg07112154 | -0.030 | 0.063 | -0.021 | -0.342 | 13.672 |
| BAHD1     | cg07114024 | -0.019 | 0.048 | -0.014 | -0.342 | 13.672 |
| MGC33302  | cg15557833 | -0.082 | 0.157 | -0.058 | -0.342 | 13.672 |
| ACOT7     | cg17236617 | -0.026 | 0.106 | -0.018 | -0.342 | 13.672 |
| SLC25A20  | cg20159072 | -0.025 | 0.064 | -0.018 | -0.341 | 13.672 |
| TCN2      | cg04081402 | -0.039 | 0.074 | -0.028 | -0.341 | 13.672 |
| APC       | cg15020645 | -0.013 | 0.029 | -0.009 | -0.341 | 13.672 |
| SPOCK     | cg12832649 | -0.015 | 0.128 | -0.011 | -0.341 | 13.672 |
| PEG10     | cg08291000 | -0.068 | 0.143 | -0.048 | -0.340 | 13.672 |
| SCARB2    | cg11659747 | -0.056 | 0.111 | -0.039 | -0.340 | 13.672 |
| CDC7      | cg13599025 | -0.015 | 0.037 | -0.011 | -0.340 | 13.672 |
| C1QB      | cg22477971 | -0.047 | 0.106 | -0.034 | -0.340 | 13.672 |
| SPATA12   | cg04563996 | -0.156 | 0.355 | -0.111 | -0.340 | 13.672 |
| MELK      | cg01288067 | -0.025 | 0.128 | -0.018 | -0.340 | 13.672 |
| MEPE      | cg13255629 | -0.026 | 0.070 | -0.019 | -0.340 | 13.672 |
| OBFC2B    | cg14816013 | 0.016  | 0.813 | 0.011  | -0.340 | 13.672 |
| MST1      | cg21958034 | -0.037 | 0.205 | -0.027 | -0.340 | 13.672 |
| PLEKHA1   | cg01246254 | -0.045 | 0.134 | -0.032 | -0.340 | 13.672 |
| GLMN      | cg02748427 | -0.038 | 0.108 | -0.027 | -0.340 | 13.672 |
| EHD2      | cg12603043 | -0.009 | 0.027 | -0.007 | -0.340 | 13.672 |
| BASP1     | cg23496260 | -0.046 | 0.091 | -0.033 | -0.339 | 13.672 |
| CACNB4    | cg16111791 | -0.041 | 0.085 | -0.029 | -0.339 | 13.672 |
| PIP3-E    | cg19963522 | -0.075 | 0.189 | -0.053 | -0.339 | 13.672 |
| PABPC1    | cg20304401 | -0.055 | 0.139 | -0.039 | -0.339 | 13.672 |
| HIST1H4H  | cg15599064 | -0.061 | 0.129 | -0.043 | -0.339 | 13.672 |
| CTSZ      | cg01663968 | -0.019 | 0.049 | -0.014 | -0.338 | 13.672 |
| HSPC268   | cg07819926 | -0.015 | 0.037 | -0.011 | -0.338 | 13.672 |
| OVOL1     | cg20909686 | -0.069 | 0.119 | -0.049 | -0.338 | 13.672 |
| THRB      | cg24120841 | -0.015 | 0.046 | -0.010 | -0.338 | 13.672 |
| SAPS2     | cg01513661 | -0.051 | 0.130 | -0.036 | -0.338 | 13.672 |
| SPAG1     | cg27170159 | -0.084 | 0.210 | -0.059 | -0.338 | 13.672 |
| CCND2     | cg08069899 | -0.022 | 0.070 | -0.015 | -0.338 | 13.672 |
| EMB       | cg26781886 | -0.022 | 0.069 | -0.016 | -0.338 | 13.672 |
| SULF2     | cg22084611 | -0.060 | 0.124 | -0.042 | -0.338 | 13.672 |
| CYP2B6    | cg10322876 | -0.060 | 0.422 | -0.043 | -0.338 | 13.672 |
| PABPC4    | cg12585282 | -0.053 | 0.102 | -0.038 | -0.338 | 13.672 |

|           |            |        |       |        |        |        |
|-----------|------------|--------|-------|--------|--------|--------|
| EGFL9     | cg24908499 | -0.017 | 0.034 | -0.012 | -0.338 | 13.672 |
| SMPDL3B   | cg22421699 | -0.049 | 0.118 | -0.035 | -0.337 | 13.672 |
| EML2      | cg08831348 | -0.024 | 0.058 | -0.017 | -0.337 | 13.672 |
| WBSCR22   | cg04134859 | -0.019 | 0.045 | -0.013 | -0.337 | 13.672 |
| NRCAM     | cg17885062 | -0.036 | 0.068 | -0.026 | -0.337 | 13.672 |
| SFRP2     | cg23207990 | -0.018 | 0.080 | -0.013 | -0.337 | 13.672 |
| C1R       | cg16236875 | -0.031 | 0.076 | -0.022 | -0.337 | 13.672 |
| F25965    | cg23230018 | -0.023 | 0.057 | -0.017 | -0.337 | 13.672 |
| LAMP1     | cg24826645 | -0.037 | 0.089 | -0.026 | -0.337 | 13.672 |
| ARF6      | cg24879595 | -0.052 | 0.098 | -0.037 | -0.337 | 13.672 |
| STIM1     | cg01246405 | -0.049 | 0.123 | -0.035 | -0.336 | 13.672 |
| BAD       | cg13620770 | -0.042 | 0.117 | -0.030 | -0.336 | 13.672 |
| CHRNA3    | cg01145396 | -0.063 | 0.154 | -0.044 | -0.336 | 13.672 |
| IL6ST     | cg21950518 | -0.024 | 0.109 | -0.017 | -0.336 | 13.672 |
| SSU72     | cg20755353 | -0.020 | 0.042 | -0.014 | -0.336 | 13.672 |
| ZNF8      | cg27649653 | -0.167 | 0.787 | -0.119 | -0.336 | 13.672 |
| RCN1      | cg06755819 | -0.037 | 0.089 | -0.026 | -0.336 | 13.672 |
| BAIAP3    | cg26499611 | -0.042 | 0.109 | -0.030 | -0.336 | 13.672 |
| KNS2      | cg23948756 | -0.017 | 0.046 | -0.012 | -0.336 | 13.672 |
| NSUN5C    | cg07033083 | -0.038 | 0.074 | -0.027 | -0.336 | 13.672 |
| DDIT3     | cg15021531 | -0.030 | 0.059 | -0.021 | -0.335 | 13.672 |
| LMNB2     | cg22510943 | -0.063 | 0.139 | -0.044 | -0.335 | 13.672 |
| C20orf43  | cg00831028 | -0.025 | 0.063 | -0.018 | -0.335 | 13.672 |
| FBXO30    | cg13572545 | -0.029 | 0.093 | -0.021 | -0.335 | 13.672 |
| CD24      | cg23654549 | 0.020  | 0.175 | 0.014  | -0.334 | 13.672 |
| MSH6      | cg07652213 | -0.053 | 0.087 | -0.038 | -0.334 | 13.672 |
| ARHGEF11  | cg25017304 | -0.028 | 0.059 | -0.020 | -0.334 | 13.672 |
| WDR5B     | cg00571634 | -0.112 | 0.286 | -0.080 | -0.334 | 13.672 |
| ALDH9A1   | cg11373746 | -0.022 | 0.050 | -0.015 | -0.334 | 13.672 |
| PIM1      | cg21769943 | -0.009 | 0.021 | -0.007 | -0.334 | 13.672 |
| ARMC2     | cg12785675 | -0.023 | 0.051 | -0.017 | -0.333 | 13.672 |
| FAM50B    | cg03202897 | -0.084 | 0.590 | -0.060 | -0.333 | 13.672 |
| PFKP      | cg10247268 | -0.016 | 0.055 | -0.011 | -0.333 | 13.672 |
| C14orf119 | cg16141690 | -0.044 | 0.267 | -0.031 | -0.333 | 13.672 |
| CPEB2     | cg05562327 | -0.043 | 0.078 | -0.030 | -0.333 | 13.672 |
| OCLN      | cg13744194 | -0.049 | 0.099 | -0.035 | -0.333 | 13.672 |
| PPP2R5A   | cg07979577 | -0.013 | 0.039 | -0.009 | -0.333 | 13.672 |
| MED8      | cg10548277 | -0.022 | 0.051 | -0.015 | -0.332 | 13.672 |
| KIAA0853  | cg12378831 | -0.031 | 0.057 | -0.022 | -0.332 | 13.672 |
| UHRF1     | cg13282951 | -0.054 | 0.117 | -0.039 | -0.332 | 13.672 |
| TRA2A     | cg00288562 | -0.018 | 0.081 | -0.013 | -0.332 | 13.672 |
| TRPM5     | cg07882535 | -0.049 | 0.108 | -0.035 | -0.332 | 13.672 |
| SDC1      | cg13758659 | -0.036 | 0.081 | -0.026 | -0.332 | 13.672 |
| FLJ21908  | cg18216249 | -0.046 | 0.093 | -0.033 | -0.332 | 13.672 |
| GRK6      | cg21424904 | -0.010 | 0.017 | -0.007 | -0.332 | 13.672 |
| BACE2     | cg25906419 | -0.011 | 0.041 | -0.008 | -0.332 | 13.672 |
| RASSF1    | cg06063729 | -0.022 | 0.047 | -0.016 | -0.331 | 13.672 |
| NUDT16    | cg26459500 | -0.024 | 0.059 | -0.017 | -0.331 | 13.672 |
| ZNF614    | cg25776555 | -0.031 | 0.118 | -0.022 | -0.331 | 13.672 |
| CA6       | cg25919221 | -0.047 | 0.124 | -0.033 | -0.331 | 13.672 |
| C1orf77   | cg13283942 | -0.015 | 0.031 | -0.010 | -0.331 | 13.672 |
| CHKA      | cg27090024 | -0.025 | 0.079 | -0.018 | -0.331 | 13.672 |
| SKIV2L    | cg17680902 | -0.026 | 0.064 | -0.018 | -0.331 | 13.672 |
| SEPP1     | cg04502814 | -0.011 | 0.042 | -0.008 | -0.330 | 13.672 |
| MMS19L    | cg14175593 | -0.028 | 0.051 | -0.020 | -0.330 | 13.672 |
| CCDC55    | cg25346576 | -0.112 | 0.195 | -0.079 | -0.330 | 13.672 |

|           |            |        |       |        |        |        |
|-----------|------------|--------|-------|--------|--------|--------|
| CRMP1     | cg03544320 | -0.033 | 0.408 | -0.024 | -0.330 | 13.672 |
| TMEM16K   | cg09632416 | -0.010 | 0.030 | -0.007 | -0.330 | 13.672 |
| WT1       | cg25563456 | -0.014 | 0.042 | -0.010 | -0.330 | 13.672 |
| MMD       | cg01992081 | -0.024 | 0.060 | -0.017 | -0.330 | 13.672 |
| IDI1      | cg08020381 | -0.011 | 0.027 | -0.008 | -0.330 | 13.672 |
| C10orf22  | cg23680936 | -0.010 | 0.028 | -0.007 | -0.330 | 13.672 |
| MRPS33    | cg18384643 | -0.026 | 0.085 | -0.018 | -0.330 | 13.672 |
| ZNF264    | cg08504049 | -0.023 | 0.054 | -0.016 | -0.329 | 13.672 |
| LOC90693  | cg11783451 | -0.022 | 0.044 | -0.015 | -0.329 | 13.672 |
| CGGBP1    | cg15379887 | -0.048 | 0.103 | -0.034 | -0.329 | 13.672 |
| GNAS      | cg18619398 | -0.059 | 0.218 | -0.042 | -0.329 | 13.672 |
| PTK9      | cg18730023 | -0.046 | 0.122 | -0.032 | -0.329 | 13.672 |
| TRPM4     | cg25261908 | -0.013 | 0.032 | -0.009 | -0.329 | 13.672 |
| CCDC6     | cg15984822 | -0.031 | 0.083 | -0.022 | -0.328 | 13.672 |
| GNPDA1    | cg19704039 | -0.016 | 0.038 | -0.011 | -0.328 | 13.672 |
| CMYA1     | cg02921257 | -0.055 | 0.154 | -0.039 | -0.328 | 13.672 |
| DYNC1L1   | cg18602811 | -0.041 | 0.109 | -0.029 | -0.328 | 15.770 |
| CHMP6     | cg19693015 | -0.016 | 0.038 | -0.011 | -0.328 | 15.770 |
| TTYH1     | cg01661993 | -0.028 | 0.068 | -0.020 | -0.328 | 15.770 |
| PIK4CA    | cg21244955 | -0.050 | 0.139 | -0.036 | -0.327 | 15.770 |
| CCDC3     | cg20647888 | -0.043 | 0.082 | -0.030 | -0.327 | 15.770 |
| RPS3      | cg22368307 | -0.035 | 0.074 | -0.025 | -0.327 | 15.770 |
| FANCF     | cg02235880 | -0.038 | 0.086 | -0.027 | -0.327 | 15.770 |
| PLAGL1    | cg25350411 | -0.161 | 0.308 | -0.114 | -0.327 | 15.770 |
| ADARB1    | cg08222185 | -0.024 | 0.053 | -0.017 | -0.327 | 15.770 |
| RBM8A     | cg17036737 | -0.077 | 0.208 | -0.054 | -0.327 | 15.770 |
| BTG4      | cg22879515 | -0.019 | 0.042 | -0.013 | -0.327 | 15.770 |
| RAB2      | cg12095167 | -0.019 | 0.046 | -0.013 | -0.327 | 15.770 |
| ELN       | cg05822532 | -0.056 | 0.123 | -0.040 | -0.327 | 15.770 |
| ATAD2     | cg18604888 | -0.018 | 0.044 | -0.013 | -0.327 | 15.770 |
| PRH1      | cg24653967 | -0.059 | 0.125 | -0.042 | -0.326 | 15.770 |
| VPS18     | cg03643709 | -0.099 | 0.182 | -0.070 | -0.326 | 15.770 |
| LHPP      | cg12815841 | -0.035 | 0.079 | -0.025 | -0.326 | 15.770 |
| ZC3H12A   | cg18891404 | -0.010 | 0.029 | -0.007 | -0.326 | 15.770 |
| NEUROG1   | cg04330449 | -0.090 | 0.239 | -0.064 | -0.326 | 15.770 |
| ENPP1     | cg05417985 | -0.021 | 0.046 | -0.015 | -0.326 | 15.770 |
| KHK       | cg14527441 | -0.007 | 0.024 | -0.005 | -0.326 | 15.770 |
| ARHGEF2   | cg20375554 | -0.020 | 0.069 | -0.014 | -0.326 | 15.770 |
| MRE11A    | cg23759214 | -0.018 | 0.051 | -0.012 | -0.326 | 15.770 |
| FLJ21106  | cg07285838 | -0.023 | 0.056 | -0.017 | -0.326 | 15.770 |
| FGF10     | cg14654926 | -0.027 | 0.070 | -0.019 | -0.326 | 15.770 |
| CD44      | cg20143092 | -0.028 | 0.064 | -0.020 | -0.326 | 15.770 |
| SPHK2     | cg05990214 | -0.034 | 0.069 | -0.024 | -0.326 | 15.770 |
| ERCC1     | cg17378989 | -0.096 | 0.240 | -0.068 | -0.326 | 15.770 |
| LYK5      | cg16306381 | -0.012 | 0.031 | -0.008 | -0.325 | 15.770 |
| ZNF91     | cg07706362 | -0.038 | 0.091 | -0.027 | -0.325 | 15.770 |
| SNX17     | cg24189717 | -0.022 | 0.062 | -0.016 | -0.325 | 15.770 |
| ANKRD42   | cg15749322 | -0.037 | 0.129 | -0.026 | -0.325 | 15.770 |
| CORO2A    | cg21618439 | -0.017 | 0.096 | -0.012 | -0.325 | 15.770 |
| NFASC     | cg22571530 | -0.024 | 0.049 | -0.017 | -0.325 | 15.770 |
| MPHOSPH1  | cg20571908 | -0.038 | 0.116 | -0.027 | -0.325 | 15.770 |
| DSCR1L2   | cg02850329 | -0.033 | 0.087 | -0.024 | -0.325 | 15.770 |
| KRTAP19-3 | cg04297093 | -0.024 | 0.066 | -0.017 | -0.324 | 15.770 |
| TRIM25    | cg20676542 | -0.002 | 0.075 | -0.001 | -0.324 | 15.770 |
| SOCS1     | cg01717706 | -0.020 | 0.042 | -0.014 | -0.324 | 15.770 |
| GRIA4     | cg19343464 | -0.014 | 0.039 | -0.010 | -0.324 | 15.770 |

|          |            |        |       |        |        |        |
|----------|------------|--------|-------|--------|--------|--------|
| FLJ32130 | cg12582366 | -0.272 | 0.461 | -0.193 | -0.324 | 15.770 |
| SRM      | cg21379816 | -0.014 | 0.039 | -0.010 | -0.324 | 15.770 |
| SHF      | cg20696985 | -0.018 | 0.037 | -0.013 | -0.324 | 15.770 |
| DPM3     | cg21038964 | -0.029 | 0.059 | -0.021 | -0.324 | 15.770 |
| MAML1    | cg20060451 | -0.013 | 0.041 | -0.009 | -0.323 | 15.770 |
| TUSC2    | cg16225429 | -0.029 | 0.062 | -0.021 | -0.323 | 15.770 |
| NBN      | cg17724365 | -0.016 | 0.072 | -0.012 | -0.323 | 15.770 |
| SLC25A16 | cg14191109 | -0.132 | 0.293 | -0.093 | -0.323 | 15.770 |
| FGF8     | cg16248277 | -0.067 | 0.129 | -0.048 | -0.323 | 15.770 |
| KIAA0649 | cg15769409 | -0.017 | 0.113 | -0.012 | -0.323 | 15.770 |
| RBM9     | cg25488206 | -0.026 | 0.058 | -0.019 | -0.323 | 15.770 |
| ELN      | cg27360098 | -0.039 | 0.151 | -0.027 | -0.323 | 15.770 |
| SYK      | cg23447996 | -0.029 | 0.106 | -0.021 | -0.323 | 15.770 |
| POLR3K   | cg14747225 | -0.040 | 0.090 | -0.029 | -0.322 | 15.770 |
| WBP4     | cg15600342 | -0.018 | 0.042 | -0.012 | -0.322 | 15.770 |
| SLC2A1   | cg20345840 | -0.017 | 0.058 | -0.012 | -0.322 | 15.770 |
| CTRL     | cg04413148 | -0.031 | 0.067 | -0.022 | -0.322 | 15.770 |
| RPL36    | cg25136310 | -0.020 | 0.088 | -0.014 | -0.322 | 15.770 |
| FNDC4    | cg20369763 | -0.028 | 0.059 | -0.020 | -0.322 | 15.770 |
| TYMS     | cg18419020 | -0.023 | 0.052 | -0.016 | -0.322 | 15.770 |
| MTBP     | cg03521600 | -0.020 | 0.046 | -0.014 | -0.322 | 15.770 |
| TREM1    | cg06196379 | -0.097 | 0.209 | -0.069 | -0.322 | 15.770 |
| SGPP2    | cg16884042 | -0.028 | 0.069 | -0.020 | -0.321 | 15.770 |
| CDC16    | cg13064881 | -0.007 | 0.017 | -0.005 | -0.321 | 15.770 |
| MRPL12   | cg01372689 | -0.016 | 0.041 | -0.011 | -0.321 | 15.770 |
| MTHFD1L  | cg21610516 | -0.041 | 0.098 | -0.029 | -0.320 | 15.770 |
| SCLY     | cg16334840 | -0.023 | 0.047 | -0.016 | -0.320 | 15.770 |
| WDR54    | cg11698762 | -0.043 | 0.083 | -0.030 | -0.320 | 15.770 |
| KRTHA8   | cg22139563 | -0.039 | 0.191 | -0.027 | -0.320 | 15.770 |
| RASSF5   | cg01860753 | -0.099 | 0.211 | -0.070 | -0.319 | 15.770 |
| C14orf39 | cg27398547 | -0.136 | 0.289 | -0.097 | -0.319 | 15.770 |
| ZIM2     | cg19771589 | -0.063 | 0.170 | -0.045 | -0.319 | 15.770 |
| HNRPA3   | cg01594915 | -0.012 | 0.028 | -0.009 | -0.319 | 15.770 |
| DOM3Z    | cg20284673 | -0.048 | 0.121 | -0.034 | -0.319 | 15.770 |
| RAI17    | cg09936762 | -0.018 | 0.067 | -0.013 | -0.318 | 15.770 |
| PSMA3    | cg05957518 | -0.016 | 0.052 | -0.011 | -0.318 | 15.770 |
| C19orf22 | cg09675889 | -0.023 | 0.077 | -0.016 | -0.318 | 15.770 |
| DEFB103A | cg17288121 | -0.048 | 0.218 | -0.034 | -0.318 | 15.770 |
| ITGB4BP  | cg27270218 | -0.017 | 0.043 | -0.012 | -0.318 | 15.770 |
| MYCBP    | cg00521598 | -0.035 | 0.129 | -0.025 | -0.318 | 15.770 |
| IL10RB   | cg17506742 | -0.014 | 0.034 | -0.010 | -0.318 | 15.770 |
| PHCA     | cg22992570 | -0.006 | 0.105 | -0.005 | -0.318 | 15.770 |
| HAP1     | cg10154926 | -0.016 | 0.062 | -0.011 | -0.318 | 15.770 |
| CCND2    | cg17886028 | -0.024 | 0.047 | -0.017 | -0.318 | 15.770 |
| MDH1     | cg19147570 | -0.023 | 0.052 | -0.016 | -0.318 | 15.770 |
| ASPM     | cg19350340 | -0.117 | 0.291 | -0.083 | -0.318 | 15.770 |
| SLC2A6   | cg25512587 | -0.041 | 0.124 | -0.029 | -0.318 | 15.770 |
| SLC6A12  | cg03139377 | -0.108 | 0.264 | -0.076 | -0.318 | 15.770 |
| USP15    | cg02776251 | -0.082 | 0.196 | -0.058 | -0.318 | 15.770 |
| LILRA4   | cg20542190 | -0.091 | 0.264 | -0.064 | -0.318 | 15.770 |
| GCA      | cg03549127 | -0.020 | 0.050 | -0.014 | -0.317 | 15.770 |
| SACM1L   | cg15602950 | -0.014 | 0.042 | -0.010 | -0.317 | 15.770 |
| MUS81    | cg15883761 | -0.021 | 0.049 | -0.015 | -0.317 | 15.770 |
| RNF144   | cg25705900 | -0.010 | 0.026 | -0.007 | -0.317 | 15.770 |
| AHSA2    | cg15118503 | -0.033 | 0.077 | -0.023 | -0.317 | 15.770 |
| MGC12966 | cg21939482 | -0.016 | 0.061 | -0.012 | -0.317 | 15.770 |

|           |            |        |       |        |        |        |
|-----------|------------|--------|-------|--------|--------|--------|
| CCDC55    | cg26813908 | -0.039 | 0.093 | -0.028 | -0.317 | 15.770 |
| MOCS3     | cg03700308 | -0.025 | 0.071 | -0.018 | -0.317 | 15.770 |
| CSTF2T    | cg06712026 | -0.025 | 0.045 | -0.018 | -0.317 | 15.770 |
| C14orf126 | cg15247031 | -0.045 | 0.108 | -0.032 | -0.317 | 15.770 |
| TCP11L1   | cg18495563 | -0.035 | 0.077 | -0.025 | -0.317 | 15.770 |
| ACOX1     | cg16419345 | -0.017 | 0.037 | -0.012 | -0.316 | 15.770 |
| TAOK3     | cg00545573 | -0.059 | 0.152 | -0.042 | -0.316 | 15.770 |
| C18orf54  | cg00381076 | -0.013 | 0.054 | -0.009 | -0.316 | 15.770 |
| FLJ20643  | cg25658980 | -0.020 | 0.056 | -0.014 | -0.316 | 15.770 |
| SCC-112   | cg17815841 | -0.006 | 0.013 | -0.004 | -0.316 | 15.770 |
| MLF2      | cg23311549 | -0.011 | 0.046 | -0.008 | -0.316 | 15.770 |
| CBS       | cg09622447 | -0.034 | 0.097 | -0.024 | -0.315 | 15.770 |
| TWSG1     | cg23435746 | -0.037 | 0.095 | -0.026 | -0.315 | 15.770 |
| LRIG3     | cg11625946 | -0.013 | 0.028 | -0.009 | -0.315 | 15.770 |
| MEST      | cg13917504 | -0.065 | 0.159 | -0.046 | -0.315 | 15.770 |
| INSL5     | cg04979933 | -0.076 | 0.139 | -0.054 | -0.315 | 15.770 |
| BUB3      | cg23724447 | -0.035 | 0.136 | -0.025 | -0.315 | 15.770 |
| SPIN1     | cg02491012 | -0.055 | 0.108 | -0.039 | -0.315 | 15.770 |
| C18orf1   | cg04633384 | -0.021 | 0.045 | -0.015 | -0.315 | 15.770 |
| CSNK1G3   | cg02631957 | -0.035 | 0.062 | -0.025 | -0.315 | 15.770 |
| MYCT1     | cg02830467 | -0.148 | 0.407 | -0.105 | -0.315 | 15.770 |
| EXOC7     | cg21016177 | -0.018 | 0.043 | -0.013 | -0.315 | 15.770 |
| NT5C1A    | cg01656955 | -0.039 | 0.091 | -0.028 | -0.314 | 15.770 |
| ATP6V1C1  | cg02187914 | -0.036 | 0.088 | -0.026 | -0.314 | 15.770 |
| ACVRL1    | cg10999429 | -0.015 | 0.059 | -0.011 | -0.314 | 15.770 |
| CTSO      | cg16181202 | -0.034 | 0.082 | -0.024 | -0.314 | 15.770 |
| FLJ22639  | cg26211698 | -0.017 | 0.052 | -0.012 | -0.314 | 15.770 |
| UGDH      | cg27406727 | -0.015 | 0.032 | -0.011 | -0.314 | 15.770 |
| ATG10     | cg06777715 | -0.027 | 0.092 | -0.019 | -0.314 | 15.770 |
| C1orf94   | cg08527127 | -0.074 | 0.152 | -0.052 | -0.314 | 15.770 |
| PDCD10    | cg06323427 | -0.018 | 0.042 | -0.013 | -0.313 | 15.770 |
| PYCARD    | cg15468095 | -0.033 | 0.084 | -0.023 | -0.313 | 15.770 |
| HSPC268   | cg07050831 | -0.026 | 0.065 | -0.019 | -0.313 | 15.770 |
| RAP1A     | cg07597871 | -0.016 | 0.040 | -0.011 | -0.313 | 15.770 |
| ANKRD38   | cg00625425 | -0.096 | 0.382 | -0.068 | -0.313 | 17.895 |
| CYP1A1    | cg26704579 | -0.049 | 0.117 | -0.035 | -0.313 | 17.895 |
| ETV4      | cg05011232 | -0.018 | 0.056 | -0.013 | -0.312 | 17.895 |
| AIP       | cg21747271 | -0.077 | 0.170 | -0.054 | -0.312 | 17.895 |
| KLF15     | cg26436315 | -0.015 | 0.120 | -0.011 | -0.312 | 17.895 |
| TMEM106A  | cg04482110 | -0.032 | 0.066 | -0.023 | -0.312 | 17.895 |
| SULT1A1   | cg18530748 | -0.098 | 0.280 | -0.069 | -0.312 | 17.895 |
| ARG99     | cg20784775 | -0.050 | 0.111 | -0.035 | -0.312 | 17.895 |
| AP2S1     | cg23131950 | -0.038 | 0.081 | -0.027 | -0.312 | 17.895 |
| CHD2      | cg02169430 | -0.027 | 0.075 | -0.019 | -0.311 | 17.895 |
| BNIP3     | cg22473973 | -0.042 | 0.099 | -0.030 | -0.311 | 17.895 |
| MGC11335  | cg12960248 | -0.036 | 0.069 | -0.025 | -0.311 | 17.895 |
| MYO3A     | cg08441170 | -0.036 | 0.078 | -0.025 | -0.311 | 17.895 |
| PLAGL1    | cg17895149 | -0.088 | 0.211 | -0.062 | -0.311 | 17.895 |
| FAM57B    | cg16152813 | -0.099 | 0.187 | -0.070 | -0.311 | 17.895 |
| SMARCC2   | cg03184964 | -0.036 | 0.118 | -0.026 | -0.311 | 17.895 |
| MLR2      | cg23628240 | -0.019 | 0.049 | -0.013 | -0.311 | 17.895 |
| PCDH17    | cg14893163 | -0.025 | 0.096 | -0.018 | -0.310 | 17.895 |
| C20orf86  | cg22175764 | -0.017 | 0.049 | -0.012 | -0.310 | 17.895 |
| MLL       | cg04910299 | -0.020 | 0.061 | -0.014 | -0.310 | 17.895 |
| MYLIP     | cg14298379 | -0.012 | 0.044 | -0.009 | -0.310 | 17.895 |
| PPP2R5C   | cg14512008 | -0.027 | 0.062 | -0.019 | -0.310 | 17.895 |

|          |            |        |       |        |        |        |
|----------|------------|--------|-------|--------|--------|--------|
| KIAA1841 | cg20843052 | -0.016 | 0.042 | -0.012 | -0.310 | 17.895 |
| GSN      | cg05793077 | -0.022 | 0.049 | -0.016 | -0.310 | 17.895 |
| CNP      | cg23866755 | -0.021 | 0.049 | -0.015 | -0.309 | 17.895 |
| YIPF4    | cg01195127 | -0.024 | 0.046 | -0.017 | -0.309 | 17.895 |
| C10orf42 | cg23879147 | -0.023 | 0.064 | -0.016 | -0.309 | 17.895 |
| WDR49    | cg16398289 | -0.047 | 0.123 | -0.033 | -0.309 | 17.895 |
| HMG20A   | cg22211866 | -0.047 | 0.111 | -0.034 | -0.309 | 17.895 |
| ATXN2    | cg12313568 | -0.020 | 0.059 | -0.014 | -0.309 | 17.895 |
| PKN2     | cg02558133 | -0.005 | 0.151 | -0.003 | -0.309 | 17.895 |
| PSD2     | cg17811228 | -0.026 | 0.067 | -0.019 | -0.309 | 17.895 |
| HAAO     | cg20289949 | -0.049 | 0.136 | -0.035 | -0.309 | 17.895 |
| LYN      | cg10539712 | -0.035 | 0.082 | -0.025 | -0.309 | 17.895 |
| CD14     | cg25358289 | -0.056 | 0.164 | -0.040 | -0.308 | 17.895 |
| YWHAG    | cg12730381 | -0.062 | 0.121 | -0.044 | -0.308 | 17.895 |
| HBII-13  | cg26410550 | -0.048 | 0.171 | -0.034 | -0.308 | 17.895 |
| GPSN2    | cg12846938 | -0.014 | 0.039 | -0.010 | -0.308 | 17.895 |
| SSBP4    | cg09529667 | -0.011 | 0.029 | -0.007 | -0.308 | 17.895 |
| EDG8     | cg24807354 | -0.025 | 0.060 | -0.018 | -0.308 | 17.895 |
| GFI1B    | cg00629585 | -0.190 | 0.455 | -0.135 | -0.308 | 17.895 |
| UST      | cg21273029 | -0.034 | 0.139 | -0.024 | -0.308 | 17.895 |
| THOC1    | cg27109971 | -0.063 | 0.138 | -0.045 | -0.308 | 17.895 |
| MUC13    | cg09081544 | -0.039 | 0.111 | -0.027 | -0.307 | 17.895 |
| ZFP95    | cg23668257 | -0.017 | 0.047 | -0.012 | -0.307 | 17.895 |
| HEBP1    | cg26648592 | -0.013 | 0.033 | -0.009 | -0.307 | 17.895 |
| C10orf4  | cg10830758 | -0.013 | 0.126 | -0.009 | -0.307 | 17.895 |
| VPS54    | cg24514921 | -0.018 | 0.052 | -0.013 | -0.307 | 17.895 |
| ATP1A1   | cg14841875 | -0.020 | 0.063 | -0.014 | -0.307 | 17.895 |
| RAD18    | cg26640549 | -0.048 | 0.115 | -0.034 | -0.307 | 17.895 |
| HIP1     | cg24650353 | -0.023 | 0.092 | -0.016 | -0.307 | 17.895 |
| FASN     | cg03386722 | -0.012 | 0.072 | -0.009 | -0.307 | 17.895 |
| ZNF688   | cg11141013 | -0.009 | 0.029 | -0.006 | -0.307 | 17.895 |
| PPIL5    | cg13892015 | -0.020 | 0.051 | -0.014 | -0.307 | 17.895 |
| H19      | cg17769238 | -0.060 | 0.198 | -0.043 | -0.306 | 17.895 |
| ZNF581   | cg00376639 | -0.047 | 0.110 | -0.034 | -0.306 | 17.895 |
| CENPF    | cg00620223 | -0.021 | 0.059 | -0.015 | -0.306 | 17.895 |
| CPNE4    | cg09147222 | -0.095 | 0.302 | -0.068 | -0.306 | 17.895 |
| CCDC64   | cg13752005 | -0.012 | 0.027 | -0.009 | -0.306 | 17.895 |
| SEPT10   | cg21537939 | -0.054 | 0.242 | -0.038 | -0.306 | 17.895 |
| SLCO4A1  | cg09210315 | -0.045 | 0.141 | -0.032 | -0.306 | 17.895 |
| C12orf49 | cg01308601 | -0.025 | 0.075 | -0.017 | -0.306 | 17.895 |
| ACYP2    | cg01615080 | -0.028 | 0.053 | -0.020 | -0.306 | 17.895 |
| RAB6IP2  | cg17416608 | -0.021 | 0.053 | -0.015 | -0.306 | 17.895 |
| IMPDH1   | cg05079794 | -0.014 | 0.037 | -0.010 | -0.306 | 17.895 |
| SPAG4    | cg14961385 | -0.020 | 0.064 | -0.014 | -0.306 | 17.895 |
| KCNQ1    | cg20751395 | -0.050 | 0.183 | -0.036 | -0.306 | 17.895 |
| CANT1    | cg21260850 | -0.020 | 0.043 | -0.014 | -0.305 | 17.895 |
| C1QC     | cg11393848 | -0.050 | 0.113 | -0.036 | -0.305 | 17.895 |
| CABIN1   | cg15061008 | -0.018 | 0.043 | -0.013 | -0.305 | 17.895 |
| MYH4     | cg23400451 | -0.030 | 0.184 | -0.021 | -0.305 | 17.895 |
| IL27RA   | cg07979357 | -0.118 | 0.313 | -0.084 | -0.305 | 17.895 |
| IGF2AS   | cg04112019 | -0.041 | 0.127 | -0.029 | -0.305 | 17.895 |
| ADD1     | cg13979182 | -0.039 | 0.114 | -0.028 | -0.305 | 17.895 |
| WNT3     | cg00126034 | -0.015 | 0.035 | -0.011 | -0.305 | 17.895 |
| NOTCH4   | cg14700707 | -0.142 | 0.318 | -0.101 | -0.305 | 17.895 |
| SFRS14   | cg25234963 | -0.014 | 0.034 | -0.010 | -0.304 | 17.895 |
| SMARCA3  | cg26151310 | -0.018 | 0.044 | -0.013 | -0.304 | 17.895 |

|          |            |        |       |        |        |        |
|----------|------------|--------|-------|--------|--------|--------|
| GMNN     | cg06281719 | -0.058 | 0.137 | -0.041 | -0.304 | 17.895 |
| PLEK2    | cg20141916 | -0.008 | 0.034 | -0.005 | -0.304 | 17.895 |
| CNNM2    | cg15439196 | -0.080 | 0.207 | -0.057 | -0.304 | 17.895 |
| PSMC2    | cg27109647 | -0.040 | 0.094 | -0.028 | -0.304 | 17.895 |
| RBP1     | cg11027570 | -0.028 | 0.061 | -0.020 | -0.304 | 17.895 |
| GALR1    | cg15343119 | -0.044 | 0.130 | -0.031 | -0.304 | 17.895 |
| LSAMP    | cg25315362 | -0.099 | 0.259 | -0.071 | -0.304 | 17.895 |
| TAPBP    | cg26315802 | -0.041 | 0.093 | -0.029 | -0.304 | 17.895 |
| APOC1    | cg11337525 | -0.026 | 0.092 | -0.018 | -0.304 | 17.895 |
| MTNR1A   | cg10063179 | -0.014 | 0.042 | -0.010 | -0.303 | 17.895 |
| BCL2     | cg08554462 | -0.040 | 0.126 | -0.028 | -0.303 | 17.895 |
| TLK2     | cg23181434 | -0.062 | 0.162 | -0.044 | -0.303 | 17.895 |
| HSP90B1  | cg16085042 | -0.011 | 0.026 | -0.008 | -0.303 | 17.895 |
| SACM1L   | cg04837898 | -0.066 | 0.151 | -0.047 | -0.303 | 17.895 |
| ZNF569   | cg18244915 | -0.021 | 0.049 | -0.015 | -0.303 | 17.895 |
| CASC3    | cg06307169 | -0.057 | 0.140 | -0.040 | -0.302 | 17.895 |
| SGCE     | cg03682823 | -0.030 | 0.108 | -0.022 | -0.302 | 17.895 |
| KIF1B    | cg06615861 | -0.009 | 0.068 | -0.006 | -0.302 | 17.895 |
| THBS4    | cg18110483 | -0.020 | 0.062 | -0.014 | -0.302 | 17.895 |
| CYP1A2   | cg09207718 | -0.033 | 0.096 | -0.023 | -0.302 | 17.895 |
| NDN      | cg06743811 | -0.053 | 0.151 | -0.038 | -0.302 | 17.895 |
| LENG4    | cg23968678 | -0.009 | 0.033 | -0.006 | -0.302 | 17.895 |
| SPN      | cg26751195 | -0.043 | 0.131 | -0.031 | -0.302 | 17.895 |
| PRCP     | cg27561006 | -0.052 | 0.099 | -0.037 | -0.302 | 17.895 |
| JMJD2A   | cg08552254 | -0.074 | 0.252 | -0.052 | -0.302 | 17.895 |
| PCMT1    | cg13662243 | -0.075 | 0.227 | -0.053 | -0.302 | 17.895 |
| MPHOSPH6 | cg16119274 | -0.015 | 0.033 | -0.010 | -0.302 | 17.895 |
| CYP46A1  | cg01117627 | -0.012 | 0.029 | -0.009 | -0.302 | 17.895 |
| MGC15476 | cg08906015 | -0.043 | 0.144 | -0.030 | -0.302 | 17.895 |
| SLC16A13 | cg09543792 | -0.010 | 0.047 | -0.007 | -0.302 | 17.895 |
| POLR2G   | cg22176017 | -0.026 | 0.070 | -0.019 | -0.302 | 17.895 |
| TRSPAP1  | cg10691259 | -0.012 | 0.038 | -0.008 | -0.302 | 17.895 |
| PPA2     | cg09459044 | -0.020 | 0.049 | -0.014 | -0.301 | 17.895 |
| LSM12    | cg24682149 | -0.018 | 0.053 | -0.013 | -0.301 | 17.895 |
| NPAS2    | cg07799947 | -0.041 | 0.138 | -0.029 | -0.301 | 17.895 |
| KCNF1    | cg22085335 | -0.027 | 0.064 | -0.019 | -0.301 | 17.895 |
| PHF13    | cg08661290 | -0.025 | 0.067 | -0.018 | -0.301 | 17.895 |
| ZNF346   | cg24504986 | -0.011 | 0.046 | -0.008 | -0.301 | 17.895 |
| TBC1D10A | cg04644624 | -0.071 | 0.197 | -0.050 | -0.301 | 17.895 |
| GLRX5    | cg11375079 | -0.029 | 0.090 | -0.021 | -0.300 | 17.895 |
| GPR61    | cg00521434 | -0.026 | 0.071 | -0.018 | -0.300 | 17.895 |
| NIFIE14  | cg19016517 | -0.026 | 0.064 | -0.018 | -0.300 | 17.895 |
| RAB1A    | cg14217102 | -0.007 | 0.016 | -0.005 | -0.300 | 17.895 |
| KIAA0513 | cg24148044 | -0.014 | 0.042 | -0.010 | -0.300 | 17.895 |
| PYCARD   | cg09587549 | -0.026 | 0.060 | -0.019 | -0.300 | 17.895 |
| MEST     | cg01888566 | -0.070 | 0.311 | -0.049 | -0.300 | 17.895 |
| RAB3GAP1 | cg12813922 | -0.018 | 0.039 | -0.012 | -0.300 | 17.895 |
| IL1R1    | cg15233681 | -0.045 | 0.113 | -0.032 | -0.300 | 17.895 |
| FAM20A   | cg13591701 | -0.039 | 0.128 | -0.028 | -0.299 | 17.895 |
| TMED6    | cg16148454 | -0.027 | 0.121 | -0.019 | -0.299 | 17.895 |
| SCARF2   | cg14785479 | -0.030 | 0.068 | -0.021 | -0.299 | 17.895 |
| SRRM2    | cg07195622 | -0.009 | 0.028 | -0.007 | -0.299 | 17.895 |
| SMPD3    | cg22116290 | -0.028 | 0.076 | -0.020 | -0.299 | 17.895 |
| MLLT6    | cg01485645 | -0.026 | 0.064 | -0.018 | -0.299 | 17.895 |
| PSCD1    | cg08024766 | -0.018 | 0.062 | -0.013 | -0.299 | 17.895 |
| SRF      | cg14839932 | -0.023 | 0.082 | -0.016 | -0.299 | 17.895 |

|                |                   |               |              |               |               |               |
|----------------|-------------------|---------------|--------------|---------------|---------------|---------------|
| HMGCS1         | cg18646457        | -0.032        | 0.070        | -0.022        | -0.299        | 17.895        |
| NF1            | cg19959519        | -0.027        | 0.061        | -0.019        | -0.299        | 17.895        |
| <b>FNDC5</b>   | <b>cg20951444</b> | <b>-0.078</b> | <b>0.197</b> | <b>-0.056</b> | <b>-0.299</b> | <b>17.895</b> |
| CYP20A1        | cg27413025        | -0.045        | 0.100        | -0.032        | -0.299        | 17.895        |
| GNAS           | cg21625881        | -0.041        | 0.151        | -0.029        | -0.299        | 17.895        |
| FKBP11         | cg21908259        | -0.033        | 0.081        | -0.023        | -0.299        | 17.895        |
| CDKN1C         | cg04548378        | -0.024        | 0.060        | -0.017        | -0.299        | 17.895        |
| OR2A4          | cg17026542        | -0.031        | 0.075        | -0.022        | -0.299        | 17.895        |
| MYBBP1A        | cg21000021        | -0.035        | 0.084        | -0.025        | -0.299        | 17.895        |
| SPATA6         | cg04141379        | -0.013        | 0.054        | -0.009        | -0.298        | 17.895        |
| GFER           | cg15643724        | -0.014        | 0.039        | -0.010        | -0.298        | 17.895        |
| NT5E           | cg17488985        | -0.034        | 0.052        | -0.024        | -0.298        | 17.895        |
| SLC25A4        | cg27583030        | -0.033        | 0.109        | -0.024        | -0.298        | 17.895        |
| ZNF207         | cg06168050        | -0.039        | 0.120        | -0.027        | -0.298        | 17.895        |
| <b>ASL</b>     | <b>cg20857947</b> | <b>-0.082</b> | <b>0.175</b> | <b>-0.058</b> | <b>-0.298</b> | <b>17.895</b> |
| SAMD8          | cg25229706        | -0.027        | 0.072        | -0.019        | -0.298        | 17.895        |
| ZNF187         | cg19217872        | -0.025        | 0.083        | -0.018        | -0.298        | 17.895        |
| <b>SRF</b>     | <b>cg00984602</b> | <b>-0.076</b> | <b>0.211</b> | <b>-0.054</b> | <b>-0.298</b> | <b>17.895</b> |
| MAPK7          | cg17559549        | -0.040        | 0.085        | -0.028        | -0.298        | 17.895        |
| <b>TUBA3</b>   | <b>cg14802310</b> | <b>-0.099</b> | <b>0.237</b> | <b>-0.070</b> | <b>-0.298</b> | <b>17.895</b> |
| IL1R1          | cg26657648        | -0.056        | 0.116        | -0.040        | -0.298        | 17.895        |
| FOXL1          | cg06995715        | -0.014        | 0.074        | -0.010        | -0.298        | 17.895        |
| ARID4A         | cg08790491        | -0.023        | 0.055        | -0.017        | -0.298        | 17.895        |
| TPD52          | cg18459342        | -0.038        | 0.152        | -0.027        | -0.298        | 17.895        |
| CASQ2          | cg18942631        | -0.062        | 0.137        | -0.044        | -0.298        | 17.895        |
| FUBP1          | cg08707063        | -0.040        | 0.091        | -0.029        | -0.297        | 17.895        |
| AARS           | cg25432323        | -0.021        | 0.043        | -0.015        | -0.297        | 17.895        |
| TMEM117        | cg09678228        | -0.015        | 0.055        | -0.011        | -0.297        | 17.895        |
| C1orf89        | cg27298878        | -0.045        | 0.080        | -0.032        | -0.297        | 17.895        |
| IVNS1ABP       | cg25423402        | -0.008        | 0.054        | -0.006        | -0.297        | 17.895        |
| C19orf30       | cg02479575        | -0.019        | 0.047        | -0.014        | -0.297        | 19.998        |
| C3orf62        | cg07758574        | -0.020        | 0.060        | -0.014        | -0.297        | 19.998        |
| PIGT           | cg26634132        | -0.010        | 0.030        | -0.007        | -0.297        | 19.998        |
| HS6ST3         | cg17183991        | -0.017        | 0.046        | -0.012        | -0.297        | 19.998        |
| FLJ90024       | cg22321558        | -0.019        | 0.065        | -0.014        | -0.296        | 19.998        |
| CDH3           | cg19034028        | -0.065        | 0.190        | -0.046        | -0.296        | 19.998        |
| NCOR1          | cg24443925        | -0.043        | 0.093        | -0.031        | -0.296        | 19.998        |
| GNRH2          | cg07549715        | -0.017        | 0.280        | -0.012        | -0.296        | 19.998        |
| <b>PEG3</b>    | <b>cg19335327</b> | <b>-0.103</b> | <b>0.187</b> | <b>-0.073</b> | <b>-0.296</b> | <b>19.998</b> |
| <b>MST1</b>    | <b>cg12788313</b> | <b>-0.122</b> | <b>0.243</b> | <b>-0.087</b> | <b>-0.296</b> | <b>19.998</b> |
| BAZ1B          | cg14093368        | -0.019        | 0.052        | -0.013        | -0.296        | 19.998        |
| CDKN1C         | cg20919799        | -0.010        | 0.030        | -0.007        | -0.296        | 19.998        |
| <b>ZNF512</b>  | <b>cg19451391</b> | <b>0.140</b>  | <b>0.866</b> | <b>0.099</b>  | <b>-0.296</b> | <b>19.998</b> |
| THEM4          | cg07017477        | -0.018        | 0.904        | -0.013        | -0.296        | 19.998        |
| CDYL           | cg09600520        | -0.061        | 0.164        | -0.043        | -0.295        | 19.998        |
| FZD10          | cg23054883        | -0.014        | 0.077        | -0.010        | -0.295        | 19.998        |
| KCNMA1         | cg04688368        | -0.010        | 0.033        | -0.007        | -0.295        | 19.998        |
| LTC4S          | cg11394785        | -0.052        | 0.158        | -0.037        | -0.295        | 19.998        |
| INPP1          | cg16691616        | -0.022        | 0.046        | -0.015        | -0.295        | 19.998        |
| AATF           | cg11857445        | -0.020        | 0.054        | -0.014        | -0.295        | 19.998        |
| CA2            | cg19876444        | -0.066        | 0.294        | -0.047        | -0.295        | 19.998        |
| ZNF649         | cg15534084        | -0.061        | 0.123        | -0.043        | -0.295        | 19.998        |
| <b>CCIN</b>    | <b>cg15248035</b> | <b>-0.131</b> | <b>0.471</b> | <b>-0.093</b> | <b>-0.294</b> | <b>19.998</b> |
| <b>C1orf65</b> | <b>cg27202708</b> | <b>-0.154</b> | <b>0.298</b> | <b>-0.109</b> | <b>-0.294</b> | <b>19.998</b> |
| USP30          | cg03070588        | -0.015        | 0.041        | -0.010        | -0.294        | 19.998        |
| CHFR           | cg23653008        | -0.018        | 0.039        | -0.012        | -0.294        | 19.998        |



|           |            |        |       |        |        |        |
|-----------|------------|--------|-------|--------|--------|--------|
| PACS1     | cg01663295 | -0.032 | 0.109 | -0.023 | -0.294 | 19.998 |
| CHPT1     | cg12924262 | -0.026 | 0.071 | -0.019 | -0.294 | 19.998 |
| MGC35043  | cg22334000 | -0.025 | 0.068 | -0.018 | -0.294 | 19.998 |
| STIM1     | cg06349174 | -0.013 | 0.085 | -0.009 | -0.294 | 19.998 |
| AMPD2     | cg14254419 | -0.021 | 0.067 | -0.015 | -0.294 | 19.998 |
| ISYNA1    | cg00445824 | -0.046 | 0.093 | -0.033 | -0.293 | 19.998 |
| ALX4      | cg07696033 | -0.021 | 0.060 | -0.015 | -0.293 | 19.998 |
| DDAH1     | cg21589280 | -0.077 | 0.239 | -0.055 | -0.293 | 19.998 |
| HSPA1A    | cg05920090 | -0.025 | 0.073 | -0.017 | -0.293 | 19.998 |
| DOCK1     | cg13434852 | -0.025 | 0.087 | -0.017 | -0.293 | 19.998 |
| RNASET2   | cg14479329 | -0.029 | 0.110 | -0.021 | -0.293 | 19.998 |
| SLC37A1   | cg17398613 | -0.050 | 0.161 | -0.036 | -0.293 | 19.998 |
| SMPDL3A   | cg22401066 | -0.015 | 0.064 | -0.010 | -0.293 | 19.998 |
| IQGAP1    | cg17891123 | -0.033 | 0.129 | -0.023 | -0.293 | 19.998 |
| YBX1      | cg27530424 | -0.047 | 0.189 | -0.034 | -0.293 | 19.998 |
| MAGI2     | cg05902852 | -0.019 | 0.046 | -0.014 | -0.293 | 19.998 |
| RNF4      | cg07651857 | -0.027 | 0.062 | -0.019 | -0.293 | 19.998 |
| CHST13    | cg07745434 | 0.012  | 0.910 | 0.009  | -0.292 | 19.998 |
| PGPEP1    | cg10266068 | -0.034 | 0.071 | -0.024 | -0.292 | 19.998 |
| PSCD3     | cg26774430 | -0.016 | 0.037 | -0.011 | -0.292 | 19.998 |
| RAB4A     | cg03825921 | -0.078 | 0.174 | -0.055 | -0.292 | 19.998 |
| SFRS5     | cg08653874 | -0.014 | 0.039 | -0.010 | -0.292 | 19.998 |
| DGCR2     | cg16621987 | -0.020 | 0.112 | -0.014 | -0.292 | 19.998 |
| ADCY4     | cg12265829 | -0.031 | 0.117 | -0.022 | -0.292 | 19.998 |
| HIRA      | cg21311175 | -0.018 | 0.054 | -0.013 | -0.292 | 19.998 |
| PYCARD    | cg12100791 | -0.028 | 0.077 | -0.020 | -0.292 | 19.998 |
| DRD1      | cg16112129 | -0.022 | 0.057 | -0.015 | -0.291 | 19.998 |
| ZNF567    | cg09984370 | -0.014 | 0.045 | -0.010 | -0.291 | 19.998 |
| ME1       | cg24881834 | -0.047 | 0.236 | -0.033 | -0.291 | 19.998 |
| ALS2CL    | cg05369142 | -0.024 | 0.110 | -0.017 | -0.291 | 19.998 |
| LYZL4     | cg10864941 | -0.063 | 0.109 | -0.045 | -0.291 | 19.998 |
| USP15     | cg12304441 | -0.011 | 0.035 | -0.008 | -0.291 | 19.998 |
| KIAA1900  | cg16823105 | -0.017 | 0.049 | -0.012 | -0.291 | 19.998 |
| DGKQ      | cg17592292 | -0.035 | 0.092 | -0.025 | -0.291 | 19.998 |
| FAM29A    | cg07664183 | -0.177 | 0.487 | -0.126 | -0.291 | 19.998 |
| BRD1      | cg25943702 | -0.041 | 0.265 | -0.029 | -0.291 | 19.998 |
| WASPIP    | cg10037068 | -0.034 | 0.135 | -0.024 | -0.291 | 19.998 |
| LOC196463 | cg17946995 | -0.040 | 0.126 | -0.029 | -0.291 | 19.998 |
| TLX3      | cg25720804 | -0.014 | 0.036 | -0.010 | -0.291 | 19.998 |
| HDLBP     | cg14353516 | -0.034 | 0.091 | -0.024 | -0.290 | 19.998 |
| ZWILCH    | cg18864581 | -0.022 | 0.062 | -0.016 | -0.290 | 19.998 |
| MGC16169  | cg00230271 | -0.016 | 0.038 | -0.012 | -0.290 | 19.998 |
| RUNDC2A   | cg12405833 | -0.022 | 0.058 | -0.016 | -0.290 | 19.998 |
| SIAH1     | cg10784785 | -0.025 | 0.068 | -0.018 | -0.290 | 19.998 |
| UBE1DC1   | cg21828898 | -0.007 | 0.021 | -0.005 | -0.290 | 19.998 |
| CTTN      | cg18187335 | -0.015 | 0.039 | -0.011 | -0.290 | 19.998 |
| IL17E     | cg14366598 | -0.058 | 0.225 | -0.041 | -0.290 | 19.998 |
| CBLL1     | cg03443922 | -0.015 | 0.041 | -0.011 | -0.290 | 19.998 |
| PCSK9     | cg13191808 | 0.027  | 0.853 | 0.019  | -0.290 | 19.998 |
| C14orf105 | cg19903229 | -0.105 | 0.364 | -0.075 | -0.290 | 19.998 |
| MGC15407  | cg23192899 | -0.063 | 0.129 | -0.045 | -0.290 | 19.998 |
| DUSP14    | cg02987163 | -0.026 | 0.050 | -0.018 | -0.290 | 19.998 |
| KIAA0828  | cg16584911 | -0.039 | 0.115 | -0.028 | -0.290 | 19.998 |
| ALX4      | cg04970352 | -0.020 | 0.076 | -0.014 | -0.290 | 19.998 |
| BPGM      | cg05680424 | -0.018 | 0.050 | -0.013 | -0.290 | 19.998 |
| ZFYVE1    | cg07070694 | -0.034 | 0.093 | -0.024 | -0.290 | 19.998 |

|           |            |        |       |        |        |        |
|-----------|------------|--------|-------|--------|--------|--------|
| MAP2K5    | cg12246527 | -0.013 | 0.037 | -0.009 | -0.290 | 19.998 |
| PTPN9     | cg25283338 | -0.036 | 0.073 | -0.025 | -0.290 | 19.998 |
| POLR2G    | cg11372696 | -0.027 | 0.112 | -0.019 | -0.290 | 19.998 |
| ATP10A    | cg15523238 | -0.023 | 0.050 | -0.016 | -0.289 | 19.998 |
| TYR       | cg03417466 | -0.073 | 0.275 | -0.052 | -0.289 | 19.998 |
| C3orf31   | cg03169527 | -0.028 | 0.143 | -0.020 | -0.289 | 19.998 |
| LIN7B     | cg00430945 | -0.022 | 0.068 | -0.015 | -0.289 | 19.998 |
| KCNA4     | cg03506489 | -0.012 | 0.058 | -0.009 | -0.289 | 19.998 |
| HINT3     | cg07240721 | -0.013 | 0.035 | -0.009 | -0.289 | 19.998 |
| C14orf115 | cg22247240 | -0.030 | 0.089 | -0.022 | -0.289 | 19.998 |
| FBXO30    | cg25399367 | -0.023 | 0.060 | -0.016 | -0.289 | 19.998 |
| MT4       | cg01015871 | -0.039 | 0.188 | -0.027 | -0.289 | 19.998 |
| FLJ13576  | cg13391638 | -0.015 | 0.044 | -0.011 | -0.289 | 19.998 |
| SLC5A5    | cg01655355 | -0.020 | 0.050 | -0.014 | -0.289 | 19.998 |
| ENO1      | cg07483064 | -0.028 | 0.090 | -0.020 | -0.288 | 19.998 |
| FLJ35801  | cg15425811 | -0.116 | 0.282 | -0.082 | -0.288 | 19.998 |
| ABCD4     | cg15912427 | -0.022 | 0.052 | -0.016 | -0.288 | 19.998 |
| SETDB1    | cg17918089 | -0.012 | 0.031 | -0.009 | -0.288 | 19.998 |
| MICAL1    | cg23390397 | -0.020 | 0.045 | -0.014 | -0.288 | 19.998 |
| TWIST1    | cg20052718 | -0.018 | 0.048 | -0.013 | -0.288 | 19.998 |
| TM6SF1    | cg14696396 | -0.024 | 0.129 | -0.017 | -0.287 | 19.998 |
| MFSD2     | cg26908611 | -0.016 | 0.039 | -0.012 | -0.287 | 19.998 |
| CYC1      | cg06495924 | -0.016 | 0.045 | -0.011 | -0.287 | 19.998 |
| POLR3D    | cg01735903 | -0.050 | 0.100 | -0.035 | -0.287 | 19.998 |
| WNT4      | cg07180649 | -0.040 | 0.132 | -0.028 | -0.287 | 19.998 |
| GATA4     | cg00090147 | -0.025 | 0.084 | -0.018 | -0.287 | 19.998 |
| ARHGAP12  | cg02775617 | -0.084 | 0.246 | -0.059 | -0.287 | 19.998 |
| ACBD3     | cg14971781 | -0.013 | 0.046 | -0.009 | -0.287 | 19.998 |
| PIK3CA    | cg19522332 | -0.026 | 0.085 | -0.018 | -0.287 | 19.998 |
| GALNTL4   | cg25985488 | -0.011 | 0.024 | -0.008 | -0.286 | 19.998 |
| ATPIF1    | cg16834431 | -0.019 | 0.051 | -0.013 | -0.286 | 19.998 |
| KIF22     | cg04078251 | -0.008 | 0.034 | -0.006 | -0.286 | 19.998 |
| CASKIN2   | cg04121983 | -0.016 | 0.044 | -0.011 | -0.286 | 19.998 |
| NKD1      | cg06812033 | -0.021 | 0.055 | -0.015 | -0.286 | 19.998 |
| ANLN      | cg18491230 | -0.018 | 0.045 | -0.012 | -0.286 | 19.998 |
| CROP      | cg05766425 | -0.030 | 0.085 | -0.021 | -0.286 | 19.998 |
| DMWD      | cg06577658 | -0.013 | 0.032 | -0.009 | -0.286 | 19.998 |
| EPHA10    | cg07447922 | -0.015 | 0.034 | -0.011 | -0.286 | 19.998 |
| HTRA2     | cg18181070 | -0.014 | 0.046 | -0.010 | -0.286 | 19.998 |
| HMGCS2    | cg22718139 | -0.034 | 0.092 | -0.024 | -0.286 | 19.998 |
| FLJ39739  | cg09588210 | -0.034 | 0.119 | -0.024 | -0.286 | 19.998 |
| DLX5      | cg11997899 | -0.124 | 0.261 | -0.088 | -0.286 | 19.998 |
| WDR37     | cg20716571 | -0.030 | 0.090 | -0.022 | -0.286 | 19.998 |
| EPS15     | cg10089324 | -0.036 | 0.107 | -0.025 | -0.286 | 19.998 |
| C1QL1     | cg13818573 | -0.025 | 0.066 | -0.018 | -0.286 | 19.998 |
| COL1A1    | cg01234133 | -0.061 | 0.158 | -0.043 | -0.286 | 19.998 |
| PLAGL1    | cg12757684 | -0.031 | 0.147 | -0.022 | -0.286 | 19.998 |
| MCM4      | cg16104446 | -0.034 | 0.083 | -0.024 | -0.286 | 19.998 |
| ZNF273    | cg14946299 | -0.023 | 0.065 | -0.016 | -0.286 | 19.998 |
| TXNL2     | cg17976829 | -0.042 | 0.100 | -0.030 | -0.286 | 19.998 |
| ZNF169    | cg15264273 | -0.038 | 0.104 | -0.027 | -0.285 | 19.998 |
| BTBD8     | cg16725865 | -0.011 | 0.027 | -0.008 | -0.285 | 19.998 |
| SLITL2    | cg12071544 | -0.010 | 0.033 | -0.007 | -0.285 | 19.998 |
| IFNGR1    | cg14279899 | -0.030 | 0.087 | -0.021 | -0.285 | 19.998 |
| ZNF398    | cg09504196 | -0.008 | 0.023 | -0.005 | -0.285 | 19.998 |
| ZNF132    | cg19776201 | -0.009 | 0.030 | -0.006 | -0.285 | 19.998 |

|           |            |        |       |        |        |        |
|-----------|------------|--------|-------|--------|--------|--------|
| WDR20     | cg18412984 | -0.044 | 0.146 | -0.031 | -0.285 | 19.998 |
| LOC153684 | cg04741133 | -0.023 | 0.071 | -0.016 | -0.285 | 19.998 |
| ZNF343    | cg07355551 | -0.013 | 0.038 | -0.009 | -0.285 | 19.998 |
| COL9A1    | cg21789545 | -0.070 | 0.273 | -0.049 | -0.285 | 19.998 |
| DUSP13    | cg04834572 | -0.032 | 0.081 | -0.023 | -0.285 | 19.998 |
| CHES1     | cg05923056 | -0.010 | 0.028 | -0.007 | -0.285 | 19.998 |
| CYB5-M    | cg22067472 | -0.025 | 0.064 | -0.018 | -0.285 | 19.998 |
| NPBWR1    | cg02115041 | -0.022 | 0.058 | -0.016 | -0.285 | 19.998 |
| C19orf6   | cg23792364 | -0.014 | 0.067 | -0.010 | -0.285 | 19.998 |
| MGC15912  | cg13074965 | -0.014 | 0.116 | -0.010 | -0.284 | 19.998 |
| SCO1      | cg12478185 | -0.106 | 0.238 | -0.075 | -0.284 | 19.998 |
| PDPN      | cg18877506 | -0.008 | 0.018 | -0.005 | -0.284 | 19.998 |
| ARPC5     | cg03125090 | -0.018 | 0.044 | -0.012 | -0.284 | 19.998 |
| ABHD11    | cg21942546 | -0.015 | 0.050 | -0.011 | -0.284 | 19.998 |
| FLJ10292  | cg27181079 | -0.034 | 0.119 | -0.024 | -0.284 | 19.998 |
| RPL26L1   | cg14134153 | -0.040 | 0.152 | -0.028 | -0.284 | 19.998 |
| GTPBP2    | cg14465910 | -0.024 | 0.053 | -0.017 | -0.284 | 19.998 |
| ZNF625    | cg17456704 | -0.032 | 0.091 | -0.023 | -0.284 | 19.998 |
| IKIP      | cg17525003 | -0.022 | 0.067 | -0.015 | -0.284 | 19.998 |
| SSBP3     | cg12514620 | -0.022 | 0.058 | -0.015 | -0.284 | 19.998 |
| RFX1      | cg02841886 | -0.008 | 0.027 | -0.006 | -0.284 | 19.998 |
| G3BP2     | cg11489580 | -0.015 | 0.041 | -0.010 | -0.283 | 19.998 |
| GNRHR     | cg27219973 | -0.056 | 0.194 | -0.040 | -0.283 | 19.998 |
| SMYD4     | cg17057072 | -0.023 | 0.096 | -0.016 | -0.283 | 19.998 |
| CREB3L3   | cg13509147 | -0.041 | 0.121 | -0.029 | -0.283 | 19.998 |
| CYP4X1    | cg16689634 | -0.012 | 0.065 | -0.009 | -0.283 | 19.998 |
| CAMK2G    | cg17076921 | -0.031 | 0.076 | -0.022 | -0.283 | 19.998 |
| S100A6    | cg09413557 | -0.010 | 0.089 | -0.007 | -0.283 | 19.998 |
| DHX9      | cg19572947 | -0.019 | 0.047 | -0.014 | -0.283 | 19.998 |
| ESR1      | cg00655307 | -0.006 | 0.023 | -0.005 | -0.283 | 19.998 |
| BTRC      | cg13962355 | -0.017 | 0.056 | -0.012 | -0.283 | 19.998 |
| PLA2G12A  | cg24974477 | -0.030 | 0.058 | -0.021 | -0.283 | 19.998 |
| CASP8     | cg26799474 | -0.126 | 0.390 | -0.090 | -0.283 | 19.998 |
| MGMT      | cg02381948 | -0.032 | 0.082 | -0.023 | -0.283 | 19.998 |
| POLR3C    | cg22262549 | -0.016 | 0.047 | -0.011 | -0.283 | 19.998 |
| TMED4     | cg22627950 | -0.008 | 0.029 | -0.006 | -0.282 | 19.998 |
| FLG       | cg26390526 | -0.033 | 0.106 | -0.024 | -0.282 | 19.998 |
| KRTAP15-1 | cg16812893 | -0.026 | 0.065 | -0.018 | -0.282 | 19.998 |
| TMEM50B   | cg16803817 | -0.016 | 0.037 | -0.011 | -0.282 | 19.998 |
| KIAA0802  | cg07955887 | -0.028 | 0.074 | -0.020 | -0.282 | 19.998 |
| SLC37A1   | cg13265003 | -0.149 | 0.438 | -0.106 | -0.282 | 19.998 |
| RPIA      | cg13293721 | -0.016 | 0.047 | -0.011 | -0.282 | 19.998 |
| BAHD1     | cg23228048 | -0.026 | 0.054 | -0.018 | -0.282 | 19.998 |
| LRRC42    | cg04691375 | -0.071 | 0.218 | -0.050 | -0.282 | 19.998 |
| KCNK16    | cg14948436 | -0.020 | 0.116 | -0.014 | -0.282 | 19.998 |
| GPSN2     | cg17162271 | -0.019 | 0.069 | -0.013 | -0.282 | 19.998 |
| RABEPK    | cg03283569 | -0.020 | 0.040 | -0.014 | -0.282 | 19.998 |
| HLA-DPA1  | cg13906813 | -0.114 | 0.481 | -0.080 | -0.282 | 19.998 |
| SYNC1     | cg17339202 | -0.109 | 0.344 | -0.077 | -0.282 | 19.998 |
| SPATA4    | cg01311285 | -0.014 | 0.068 | -0.010 | -0.282 | 19.998 |
| NFKBIZ    | cg26284390 | -0.046 | 0.189 | -0.033 | -0.281 | 19.998 |
| UGDH      | cg09067967 | -0.047 | 0.166 | -0.033 | -0.281 | 19.998 |
| ATG4D     | cg11820497 | -0.031 | 0.058 | -0.022 | -0.281 | 19.998 |
| USP15     | cg12823748 | -0.023 | 0.059 | -0.016 | -0.281 | 19.998 |
| MGMT      | cg14129786 | -0.156 | 0.341 | -0.110 | -0.281 | 19.998 |
| C6orf55   | cg25098095 | -0.027 | 0.055 | -0.019 | -0.281 | 19.998 |

|          |            |        |       |        |        |        |
|----------|------------|--------|-------|--------|--------|--------|
| RYK      | cg25420398 | -0.021 | 0.067 | -0.015 | -0.281 | 19.998 |
| ITPA     | cg17027046 | -0.025 | 0.061 | -0.018 | -0.281 | 19.998 |
| PFN1     | cg01926595 | -0.057 | 0.135 | -0.040 | -0.281 | 19.998 |
| CCNG2    | cg05409601 | -0.018 | 0.051 | -0.013 | -0.280 | 19.998 |
| DCTN2    | cg10058540 | -0.019 | 0.050 | -0.013 | -0.280 | 19.998 |
| C1orf106 | cg15250507 | -0.015 | 0.040 | -0.010 | -0.280 | 19.998 |
| RPUSD4   | cg19857537 | -0.010 | 0.031 | -0.007 | -0.280 | 19.998 |
| MRPL36   | cg25632001 | -0.009 | 0.027 | -0.006 | -0.280 | 19.998 |
| GZMB     | cg08766149 | -0.024 | 0.100 | -0.017 | -0.280 | 19.998 |
| CDH1     | cg22832044 | -0.034 | 0.103 | -0.024 | -0.280 | 19.998 |

---

Note. FDR = false discovery rate (%). Slope = slope of least squared line. Range = range of average beta.
