# Supplementary material
Source: PubMed Central journal article supplement (PMC3235257)
Supplement: NIHMS313621-supplement-Supp_Table_S10.pdf [file NIHMS313621-supplement-Supp_Table_S10.pdf]

**Sup. Table 10:** Genes with DNA methylation of more than 1 CpG site correlated with paternal stress during preschool in girls only (all CpG sites with FDR<20%). Sites with greater than 5% differential methylation are highlighted in grey.

| Gene     | CpG Site   | Slope  | Range | Differential Methylation | Spearman $\rho$ | FDR    |
|----------|------------|--------|-------|--------------------------|-----------------|--------|
| ADCY5    | cg13878010 | 0.037  | 0.069 | 0.026                    | 0.399           | 17.895 |
| ADCY5    | cg13384396 | 0.039  | 0.100 | 0.028                    | 0.389           | 19.998 |
| ALX4     | cg07696033 | -0.021 | 0.060 | -0.015                   | -0.293          | 19.998 |
| ALX4     | cg04970352 | -0.020 | 0.076 | -0.014                   | -0.290          | 19.998 |
| ANP32E   | cg13841804 | -0.035 | 0.067 | -0.025                   | -0.455          | 5.743  |
| ANP32E   | cg02937060 | -0.053 | 0.104 | -0.037                   | -0.410          | 7.370  |
| APC      | cg24332422 | -0.038 | 0.080 | -0.027                   | -0.392          | 9.143  |
| APC      | cg15020645 | -0.013 | 0.029 | -0.009                   | -0.341          | 13.672 |
| BAG1     | cg21614231 | 0.047  | 0.107 | 0.033                    | 0.428           | 15.770 |
| BAG1     | cg07711515 | 0.042  | 0.088 | 0.030                    | 0.354           | 19.998 |
| BAHD1    | cg07114024 | -0.019 | 0.048 | -0.014                   | -0.342          | 13.672 |
| BAHD1    | cg23228048 | -0.026 | 0.054 | -0.018                   | -0.282          | 19.998 |
| BCDIN3   | cg11979382 | -0.018 | 0.041 | -0.013                   | -0.479          | 5.743  |
| BCDIN3   | cg16049587 | -0.041 | 0.084 | -0.029                   | -0.400          | 9.143  |
| BTG4     | cg23211240 | -0.028 | 0.085 | -0.020                   | -0.379          | 9.143  |
| BTG4     | cg22879515 | -0.019 | 0.042 | -0.013                   | -0.327          | 15.770 |
| C19orf30 | cg21300318 | 0.122  | 0.179 | 0.087                    | 0.517           | 0.000  |
| C19orf30 | cg20893022 | 0.074  | 0.088 | 0.053                    | 0.552           | 0.000  |
| C19orf30 | cg02479575 | -0.019 | 0.047 | -0.014                   | -0.297          | 19.998 |
| CCDC55   | cg25346576 | -0.112 | 0.195 | -0.079                   | -0.330          | 13.672 |
| CCDC55   | cg26813908 | -0.039 | 0.093 | -0.028                   | -0.317          | 15.770 |
| CCND2    | cg16994506 | -0.055 | 0.096 | -0.039                   | -0.381          | 9.143  |
| CCND2    | cg08069899 | -0.022 | 0.070 | -0.015                   | -0.338          | 13.672 |
| CCND2    | cg17886028 | -0.024 | 0.047 | -0.017                   | -0.318          | 15.770 |
| CCNT1    | cg01082679 | -0.017 | 0.033 | -0.012                   | -0.452          | 5.743  |
| CCNT1    | cg22103585 | -0.011 | 0.026 | -0.007                   | -0.437          | 7.370  |
| CDC7     | cg18127191 | -0.025 | 0.042 | -0.018                   | -0.430          | 7.370  |
| CDC7     | cg23845507 | -0.015 | 0.028 | -0.011                   | -0.363          | 11.730 |
| CDC7     | cg13599025 | -0.015 | 0.037 | -0.011                   | -0.340          | 13.672 |
| CDKN1C   | cg04548378 | -0.024 | 0.060 | -0.017                   | -0.299          | 17.895 |
| CDKN1C   | cg20919799 | -0.010 | 0.030 | -0.007                   | -0.296          | 19.998 |
| CHFR     | cg17387870 | 0.112  | 0.205 | 0.080                    | 0.422           | 17.895 |

|          |            |        |       |        |        |        |
|----------|------------|--------|-------|--------|--------|--------|
| CHFR     | cg23653008 | -0.018 | 0.039 | -0.012 | -0.294 | 19.998 |
| CHFR     | cg00338702 | 0.022  | 0.044 | 0.015  | 0.363  | 19.998 |
| CHFR     | cg06462703 | 0.020  | 0.049 | 0.014  | 0.365  | 19.998 |
| CHFR     | cg17524886 | 0.050  | 0.104 | 0.036  | 0.383  | 19.998 |
| COL1A1   | cg01593886 | -0.045 | 0.079 | -0.032 | -0.380 | 9.143  |
| COL1A1   | cg01234133 | -0.061 | 0.158 | -0.043 | -0.286 | 19.998 |
| CRMP1    | cg22680204 | -0.033 | 0.046 | -0.024 | -0.396 | 9.143  |
| CRMP1    | cg03544320 | -0.033 | 0.408 | -0.024 | -0.330 | 13.672 |
| CTTN     | cg15383392 | -0.030 | 0.065 | -0.021 | -0.364 | 11.730 |
| CTTN     | cg18187335 | -0.015 | 0.039 | -0.011 | -0.290 | 19.998 |
| DNAJC18  | cg19238398 | -0.062 | 0.119 | -0.044 | -0.404 | 9.143  |
| DNAJC18  | cg18805835 | -0.079 | 0.178 | -0.056 | -0.402 | 9.143  |
| EEF1A1   | cg01536980 | -0.028 | 0.063 | -0.020 | -0.395 | 9.143  |
| EEF1A1   | cg07740989 | -0.019 | 0.047 | -0.014 | -0.387 | 9.143  |
| ELN      | cg05822532 | -0.056 | 0.123 | -0.040 | -0.327 | 15.770 |
| ELN      | cg27360098 | -0.039 | 0.151 | -0.027 | -0.323 | 15.770 |
| EML2     | cg20427879 | -0.050 | 0.080 | -0.035 | -0.405 | 7.370  |
| EML2     | cg08831348 | -0.024 | 0.058 | -0.017 | -0.337 | 13.672 |
| FAM29A   | cg13739345 | -0.026 | 0.061 | -0.018 | -0.359 | 11.730 |
| FAM29A   | cg07664183 | -0.177 | 0.487 | -0.126 | -0.291 | 19.998 |
| FBXO28   | cg01610240 | -0.036 | 0.063 | -0.026 | -0.429 | 7.370  |
| FBXO28   | cg26043391 | -0.045 | 0.082 | -0.032 | -0.350 | 11.730 |
| FBXO30   | cg13572545 | -0.029 | 0.093 | -0.021 | -0.335 | 13.672 |
| FBXO30   | cg25399367 | -0.023 | 0.060 | -0.016 | -0.289 | 19.998 |
| GNAS     | cg27027803 | -0.061 | 0.214 | -0.043 | -0.383 | 9.143  |
| GNAS     | cg24975842 | -0.074 | 0.207 | -0.052 | -0.378 | 9.143  |
| GNAS     | cg21988465 | -0.083 | 0.135 | -0.059 | -0.369 | 11.730 |
| GNAS     | cg07284407 | -0.105 | 0.163 | -0.075 | -0.363 | 11.730 |
| GNAS     | cg18619398 | -0.059 | 0.218 | -0.042 | -0.329 | 13.672 |
| GNAS     | cg21625881 | -0.041 | 0.151 | -0.029 | -0.299 | 17.895 |
| GPSN2    | cg12846938 | -0.014 | 0.039 | -0.010 | -0.308 | 17.895 |
| GPSN2    | cg17162271 | -0.019 | 0.069 | -0.013 | -0.282 | 19.998 |
| HIST1H3A | cg09305770 | -0.017 | 0.037 | -0.012 | -0.375 | 9.143  |
| HIST1H3A | cg08797106 | -0.065 | 0.123 | -0.046 | -0.354 | 11.730 |
| HSPC268  | cg02096656 | -0.074 | 0.155 | -0.053 | -0.365 | 11.730 |
| HSPC268  | cg07819926 | -0.015 | 0.037 | -0.011 | -0.338 | 13.672 |

|          |            |        |       |        |        |        |
|----------|------------|--------|-------|--------|--------|--------|
| HSPC268  | cg07050831 | -0.026 | 0.065 | -0.019 | -0.313 | 15.770 |
| IGF2AS   | cg12322132 | -0.016 | 0.032 | -0.011 | -0.422 | 7.370  |
| IGF2AS   | cg04112019 | -0.041 | 0.127 | -0.029 | -0.305 | 17.895 |
| IGF2AS   | cg25574024 | 0.186  | 0.782 | 0.132  | 0.345  | 19.998 |
| IL1R1    | cg15233681 | -0.045 | 0.113 | -0.032 | -0.300 | 17.895 |
| IL1R1    | cg26657648 | -0.056 | 0.116 | -0.040 | -0.298 | 17.895 |
| KHK      | cg01522194 | -0.015 | 0.052 | -0.010 | -0.357 | 11.730 |
| KHK      | cg14527441 | -0.007 | 0.024 | -0.005 | -0.326 | 15.770 |
| KIAA1822 | cg02867079 | -0.023 | 0.042 | -0.016 | -0.471 | 5.743  |
| KIAA1822 | cg06834875 | -0.018 | 0.043 | -0.013 | -0.351 | 11.730 |
| LOC51315 | cg12885244 | -0.029 | 0.108 | -0.020 | -0.393 | 9.143  |
| LOC51315 | cg26602920 | -0.041 | 0.065 | -0.029 | -0.363 | 11.730 |
| MEST     | cg13917504 | -0.065 | 0.159 | -0.046 | -0.315 | 15.770 |
| MEST     | cg01888566 | -0.070 | 0.311 | -0.049 | -0.300 | 17.895 |
| MGC33302 | cg03482087 | -0.076 | 0.101 | -0.054 | -0.610 | 0.000  |
| MGC33302 | cg03883519 | -0.091 | 0.295 | -0.064 | -0.413 | 7.370  |
| MGC33302 | cg15557833 | -0.082 | 0.157 | -0.058 | -0.342 | 13.672 |
| MGC42630 | cg22543128 | 0.081  | 0.130 | 0.057  | 0.510  | 5.743  |
| MGC42630 | cg05174079 | 0.119  | 0.246 | 0.085  | 0.367  | 19.998 |
| MGMT     | cg02381948 | -0.032 | 0.082 | -0.023 | -0.283 | 19.998 |
| MGMT     | cg14129786 | -0.156 | 0.341 | -0.110 | -0.281 | 19.998 |
| MGMT     | cg07453748 | 0.061  | 0.133 | 0.043  | 0.376  | 19.998 |
| MRPL12   | cg22663117 | -0.054 | 0.072 | -0.038 | -0.516 | 0.000  |
| MRPL12   | cg15214092 | -0.071 | 0.155 | -0.050 | -0.371 | 11.730 |
| MRPL12   | cg01372689 | -0.016 | 0.041 | -0.011 | -0.321 | 15.770 |
| MST1     | cg21958034 | -0.037 | 0.205 | -0.027 | -0.340 | 13.672 |
| MST1     | cg12788313 | -0.122 | 0.243 | -0.087 | -0.296 | 19.998 |
| NNAT     | cg23566503 | -0.133 | 0.267 | -0.094 | -0.415 | 7.370  |
| NNAT     | cg10642330 | -0.166 | 0.321 | -0.118 | -0.385 | 9.143  |
| OBFC2B   | cg25245322 | -0.025 | 0.072 | -0.018 | -0.484 | 5.743  |
| OBFC2B   | cg17709466 | -0.015 | 0.033 | -0.011 | -0.385 | 9.143  |
| OBFC2B   | cg22591065 | -0.027 | 0.051 | -0.019 | -0.350 | 11.730 |
| OBFC2B   | cg14816013 | 0.016  | 0.813 | 0.011  | -0.340 | 13.672 |
| PEG10    | cg16492735 | -0.073 | 0.274 | -0.052 | -0.388 | 9.143  |
| PEG10    | cg08291000 | -0.068 | 0.143 | -0.048 | -0.340 | 13.672 |
| PEG3     | cg14849423 | -0.094 | 0.206 | -0.067 | -0.404 | 7.370  |

|         |            |        |       |        |        |        |
|---------|------------|--------|-------|--------|--------|--------|
| PEG3    | cg19335327 | -0.103 | 0.187 | -0.073 | -0.296 | 19.998 |
| PLAGL1  | cg25350411 | -0.161 | 0.308 | -0.114 | -0.327 | 15.770 |
| PLAGL1  | cg17895149 | -0.088 | 0.211 | -0.062 | -0.311 | 17.895 |
| PLAGL1  | cg12757684 | -0.031 | 0.147 | -0.022 | -0.286 | 19.998 |
| POLR2G  | cg22176017 | -0.026 | 0.070 | -0.019 | -0.302 | 17.895 |
| POLR2G  | cg11372696 | -0.027 | 0.112 | -0.019 | -0.290 | 19.998 |
| POLR3D  | cg09037858 | -0.033 | 0.062 | -0.024 | -0.365 | 11.730 |
| POLR3D  | cg01735903 | -0.050 | 0.100 | -0.035 | -0.287 | 19.998 |
| PSMB6   | cg19921492 | -0.101 | 0.139 | -0.072 | -0.493 | 5.743  |
| PSMB6   | cg24221059 | -0.040 | 0.065 | -0.029 | -0.476 | 5.743  |
| PYCARD  | cg15468095 | -0.033 | 0.084 | -0.023 | -0.313 | 15.770 |
| PYCARD  | cg09587549 | -0.026 | 0.060 | -0.019 | -0.300 | 17.895 |
| PYCARD  | cg12100791 | -0.028 | 0.077 | -0.020 | -0.292 | 19.998 |
| RASSF5  | cg24450312 | -0.073 | 0.119 | -0.052 | -0.359 | 11.730 |
| RASSF5  | cg01860753 | -0.099 | 0.211 | -0.070 | -0.319 | 15.770 |
| RB1     | cg19296958 | 0.075  | 0.122 | 0.053  | 0.401  | 17.895 |
| RB1     | cg01738359 | 0.013  | 0.039 | 0.009  | 0.355  | 19.998 |
| RPUSD4  | cg20278498 | -0.067 | 0.111 | -0.047 | -0.434 | 7.370  |
| RPUSD4  | cg19857537 | -0.010 | 0.031 | -0.007 | -0.280 | 19.998 |
| SACM1L  | cg26864061 | -0.021 | 0.088 | -0.015 | -0.383 | 9.143  |
| SACM1L  | cg15602950 | -0.014 | 0.042 | -0.010 | -0.317 | 15.770 |
| SACM1L  | cg04837898 | -0.066 | 0.151 | -0.047 | -0.303 | 17.895 |
| SETDB1  | cg12082615 | -0.016 | 0.027 | -0.011 | -0.418 | 7.370  |
| SETDB1  | cg17918089 | -0.012 | 0.031 | -0.009 | -0.288 | 19.998 |
| SFRS2   | cg26815021 | -0.076 | 0.137 | -0.054 | -0.427 | 7.370  |
| SFRS2   | cg00953277 | -0.020 | 0.048 | -0.014 | -0.356 | 11.730 |
| SLC37A1 | cg17398613 | -0.050 | 0.161 | -0.036 | -0.293 | 19.998 |
| SLC37A1 | cg13265003 | -0.149 | 0.438 | -0.106 | -0.282 | 19.998 |
| SMPDL3A | cg14426525 | -0.043 | 0.101 | -0.030 | -0.355 | 11.730 |
| SMPDL3A | cg22401066 | -0.015 | 0.064 | -0.010 | -0.293 | 19.998 |
| SRF     | cg14839932 | -0.023 | 0.082 | -0.016 | -0.299 | 17.895 |
| SRF     | cg00984602 | -0.076 | 0.211 | -0.054 | -0.298 | 17.895 |
| SSPN    | cg24509668 | -0.043 | 0.093 | -0.030 | -0.406 | 7.370  |
| SSPN    | cg19574623 | -0.053 | 0.098 | -0.038 | -0.348 | 11.730 |
| STIM1   | cg01246405 | -0.049 | 0.123 | -0.035 | -0.336 | 13.672 |
| STIM1   | cg06349174 | -0.013 | 0.085 | -0.009 | -0.294 | 19.998 |

|         |            |        |       |        |        |        |
|---------|------------|--------|-------|--------|--------|--------|
| TGFB2   | cg11976166 | -0.122 | 0.254 | -0.086 | -0.470 | 5.743  |
| TGFB2   | cg16658719 | -0.032 | 0.053 | -0.023 | -0.456 | 5.743  |
| TRA2A   | cg19747852 | -0.037 | 0.054 | -0.027 | -0.450 | 5.743  |
| TRA2A   | cg00288562 | -0.018 | 0.081 | -0.013 | -0.332 | 13.672 |
| TRPM4   | cg26623224 | -0.034 | 0.071 | -0.024 | -0.419 | 7.370  |
| TRPM4   | cg25261908 | -0.013 | 0.032 | -0.009 | -0.329 | 13.672 |
| TRSPAP1 | cg13857440 | -0.072 | 0.110 | -0.051 | -0.497 | 5.743  |
| TRSPAP1 | cg10691259 | -0.012 | 0.038 | -0.008 | -0.302 | 17.895 |
| UGDH    | cg27406727 | -0.015 | 0.032 | -0.011 | -0.314 | 15.770 |
| UGDH    | cg09067967 | -0.047 | 0.166 | -0.033 | -0.281 | 19.998 |
| USP15   | cg02776251 | -0.082 | 0.196 | -0.058 | -0.318 | 15.770 |
| USP15   | cg12304441 | -0.011 | 0.035 | -0.008 | -0.291 | 19.998 |
| USP15   | cg12823748 | -0.023 | 0.059 | -0.016 | -0.281 | 19.998 |
| WDR37   | cg17947053 | -0.055 | 0.099 | -0.039 | -0.440 | 7.370  |
| WDR37   | cg20716571 | -0.030 | 0.090 | -0.022 | -0.286 | 19.998 |
| ZC3H12A | cg15949277 | -0.022 | 0.056 | -0.016 | -0.359 | 11.730 |
| ZC3H12A | cg18891404 | -0.010 | 0.029 | -0.007 | -0.326 | 15.770 |
| ZIM2    | cg02162069 | -0.114 | 0.347 | -0.081 | -0.441 | 7.370  |
| ZIM2    | cg22354595 | -0.096 | 0.168 | -0.068 | -0.377 | 9.143  |
| ZIM2    | cg19771589 | -0.063 | 0.170 | -0.045 | -0.319 | 15.770 |
| ZNF512  | cg18611281 | -0.043 | 0.088 | -0.030 | -0.397 | 9.143  |
| ZNF512  | cg19451391 | 0.140  | 0.866 | 0.099  | -0.296 | 19.998 |
| ZNF688  | cg10665018 | -0.069 | 0.118 | -0.049 | -0.489 | 5.743  |
| ZNF688  | cg01343729 | -0.028 | 0.042 | -0.020 | -0.446 | 5.743  |
| ZNF688  | cg27586455 | -0.020 | 0.045 | -0.014 | -0.371 | 11.730 |
| ZNF688  | cg11141013 | -0.009 | 0.029 | -0.006 | -0.307 | 17.895 |

Note. FDR = false discovery rate (%). Slope = slope of least squared line. Range = range of average beta.
