# Supplementary material
Source: PubMed Central journal article supplement (PMC3235257)
Supplement: NIHMS313621-supplement-Supp_Table_S11.pdf [file NIHMS313621-supplement-Supp_Table_S11.pdf]

**Sup. Table 11:** DAVID analysis to determine GO term enrichment for genes whose DNA methylation level was correlated with maternal stress during infancy in the full sample. All CpG sites with FDR<20% from Sup. Table 2 were used for DAVID analysis.

| Annotation Cluster 1 |                                                           | Enrichment Score: 1.4468517847164948 |       |         |       |
|----------------------|-----------------------------------------------------------|--------------------------------------|-------|---------|-------|
| Category             | Term                                                      | Count                                | %     | p value | FDR   |
| GOTERM_BP_FAT        | GO:0016051~carbohydrate biosynthetic process              | 6                                    | 4.444 | 0.003   | 4.39  |
| GOTERM_BP_FAT        | GO:0019319~hexose biosynthetic process                    | 4                                    | 2.963 | 0.003   | 5.01  |
| GOTERM_BP_FAT        | GO:0046364~monosaccharide biosynthetic process            | 4                                    | 2.963 | 0.005   | 7.48  |
| GOTERM_BP_FAT        | GO:0046165~alcohol biosynthetic process                   | 4                                    | 2.963 | 0.008   | 11.34 |
| GOTERM_BP_FAT        | GO:0006094~gluconeogenesis                                | 3                                    | 2.222 | 0.024   | 32.27 |
| GOTERM_BP_FAT        | GO:0034637~cellular carbohydrate biosynthetic process     | 4                                    | 2.963 | 0.028   | 36.46 |
| GOTERM_BP_FAT        | GO:0006006~glucose metabolic process                      | 5                                    | 3.704 | 0.042   | 49.32 |
| GOTERM_BP_FAT        | GO:0006090~pyruvate metabolic process                     | 3                                    | 2.222 | 0.058   | 61.79 |
| GOTERM_CC_FAT        | GO:0005625~soluble fraction                               | 7                                    | 5.185 | 0.070   | 58.80 |
| GOTERM_BP_FAT        | GO:0019318~hexose metabolic process                       | 5                                    | 3.704 | 0.082   | 74.49 |
| GOTERM_BP_FAT        | GO:0006091~generation of precursor metabolites and energy | 6                                    | 4.444 | 0.093   | 78.93 |
| GOTERM_BP_FAT        | GO:0005996~monosaccharide metabolic process               | 5                                    | 3.704 | 0.124   | 87.87 |
| GOTERM_BP_FAT        | GO:0046164~alcohol catabolic process                      | 3                                    | 2.222 | 0.145   | 91.75 |
| GOTERM_BP_FAT        | GO:0044275~cellular carbohydrate catabolic process        | 3                                    | 2.222 | 0.157   | 93.43 |
| GOTERM_BP_FAT        | GO:0016052~carbohydrate catabolic process                 | 3                                    | 2.222 | 0.245   | 98.88 |
| Annotation Cluster 2 |                                                           | Enrichment Score: 0.987105723000385  |       |         |       |
| Category             | Term                                                      | Count                                | %     | p value | FDR   |
| GOTERM_BP_FAT        | GO:0051674~localization of cell                           | 7                                    | 5.185 | 0.057   | 61.03 |
| GOTERM_BP_FAT        | GO:0048870~cell motility                                  | 7                                    | 5.185 | 0.057   | 61.03 |
| GOTERM_BP_FAT        | GO:0006928~cell motion                                    | 8                                    | 5.926 | 0.140   | 91.02 |

|               |                           |   |       |       |       |
|---------------|---------------------------|---|-------|-------|-------|
| GOTERM_BP_FAT | GO:0016477~cell migration | 5 | 3.704 | 0.245 | 98.87 |
|---------------|---------------------------|---|-------|-------|-------|

---

|                      |                                      |  |  |  |  |
|----------------------|--------------------------------------|--|--|--|--|
| Annotation Cluster 3 | Enrichment Score: 0.6934863934063452 |  |  |  |  |
|----------------------|--------------------------------------|--|--|--|--|

| Category      | Term                                  | Count | %     | p value | FDR   |
|---------------|---------------------------------------|-------|-------|---------|-------|
| GOTERM_BP_FAT | GO:0001568~blood vessel development   | 5     | 3.704 | 0.166   | 94.50 |
| GOTERM_BP_FAT | GO:0001944~vasculature development    | 5     | 3.704 | 0.177   | 95.58 |
| GOTERM_BP_FAT | GO:0048514~blood vessel morphogenesis | 4     | 2.963 | 0.282   | 99.50 |

---

|                      |                                      |  |  |  |  |
|----------------------|--------------------------------------|--|--|--|--|
| Annotation Cluster 4 | Enrichment Score: 0.6431480091803988 |  |  |  |  |
|----------------------|--------------------------------------|--|--|--|--|

| Category      | Term                                                      | Count | %     | p value | FDR    |
|---------------|-----------------------------------------------------------|-------|-------|---------|--------|
| GOTERM_BP_FAT | GO:0006006~glucose metabolic process                      | 5     | 3.704 | 0.042   | 49.32  |
| GOTERM_BP_FAT | GO:0019318~hexose metabolic process                       | 5     | 3.704 | 0.082   | 74.49  |
| GOTERM_BP_FAT | GO:0006091~generation of precursor metabolites and energy | 6     | 4.444 | 0.093   | 78.93  |
| GOTERM_BP_FAT | GO:0005996~monosaccharide metabolic process               | 5     | 3.704 | 0.124   | 87.87  |
| GOTERM_BP_FAT | GO:0032868~response to insulin stimulus                   | 3     | 2.222 | 0.219   | 98.08  |
| GOTERM_BP_FAT | GO:0043434~response to peptide hormone stimulus           | 3     | 2.222 | 0.410   | 99.98  |
| GOTERM_BP_FAT | GO:0009725~response to hormone stimulus                   | 4     | 2.963 | 0.684   | 100.00 |
| GOTERM_BP_FAT | GO:0009719~response to endogenous stimulus                | 4     | 2.963 | 0.748   | 100.00 |
| GOTERM_BP_FAT | GO:0010033~response to organic substance                  | 5     | 3.704 | 0.902   | 100.00 |

---

|                      |                                      |  |  |  |  |
|----------------------|--------------------------------------|--|--|--|--|
| Annotation Cluster 5 | Enrichment Score: 0.6190408676219872 |  |  |  |  |
|----------------------|--------------------------------------|--|--|--|--|

| Category      | Term                                                              | Count | %     | p value | FDR   |
|---------------|-------------------------------------------------------------------|-------|-------|---------|-------|
| GOTERM_BP_FAT | GO:0019941~modification-dependent protein catabolic process       | 7     | 5.185 | 0.179   | 95.70 |
| GOTERM_BP_FAT | GO:0043632~modification-dependent macromolecule catabolic process | 7     | 5.185 | 0.179   | 95.70 |
| GOTERM_BP_FAT | GO:0009057~macromolecule catabolic process                        | 9     | 6.667 | 0.189   | 96.47 |

|               |                                                                       |    |       |       |        |
|---------------|-----------------------------------------------------------------------|----|-------|-------|--------|
| GOTERM_BP_FAT | GO:0051603~proteolysis involved in cellular protein catabolic process | 7  | 5.185 | 0.209 | 97.64  |
| GOTERM_BP_FAT | GO:0044257~cellular protein catabolic process                         | 7  | 5.185 | 0.213 | 97.80  |
| GOTERM_BP_FAT | GO:0044265~cellular macromolecule catabolic process                   | 8  | 5.926 | 0.234 | 98.59  |
| GOTERM_BP_FAT | GO:0030163~protein catabolic process                                  | 7  | 5.185 | 0.239 | 98.72  |
| GOTERM_BP_FAT | GO:0006508~proteolysis                                                | 10 | 7.407 | 0.372 | 99.94  |
| GOTERM_BP_FAT | GO:0006511~ubiquitin-dependent protein catabolic process              | 3  | 2.222 | 0.480 | 100.00 |

---

Annotation Cluster 6      Enrichment Score: 0.606012642460105

---

| Category      | Term                                             | Count | %     | p value | FDR    |
|---------------|--------------------------------------------------|-------|-------|---------|--------|
| GOTERM_BP_FAT | GO:0006886~intracellular protein transport       | 6     | 4.444 | 0.152   | 92.80  |
| GOTERM_BP_FAT | GO:0015031~protein transport                     | 9     | 6.667 | 0.187   | 96.37  |
| GOTERM_BP_FAT | GO:0045184~establishment of protein localization | 9     | 6.667 | 0.193   | 96.77  |
| GOTERM_BP_FAT | GO:0034613~cellular protein localization         | 6     | 4.444 | 0.202   | 97.29  |
| GOTERM_BP_FAT | GO:0070727~cellular macromolecule localization   | 6     | 4.444 | 0.206   | 97.51  |
| GOTERM_BP_FAT | GO:0008104~protein localization                  | 9     | 6.667 | 0.314   | 99.75  |
| GOTERM_BP_FAT | GO:0046907~intracellular transport               | 7     | 5.185 | 0.398   | 99.97  |
| GOTERM_BP_FAT | GO:0006605~protein targeting                     | 3     | 2.222 | 0.495   | 100.00 |

---

Annotation Cluster 7      Enrichment Score: 0.5888884587220655

---

| Category      | Term                           | Count | %     | p value | FDR    |
|---------------|--------------------------------|-------|-------|---------|--------|
| GOTERM_MF_FAT | GO:0048037~cofactor binding    | 5     | 3.704 | 0.164   | 90.67  |
| GOTERM_MF_FAT | GO:0050662~coenzyme binding    | 4     | 2.963 | 0.181   | 93.00  |
| GOTERM_BP_FAT | GO:0055114~oxidation reduction | 6     | 4.444 | 0.577   | 100.00 |

---

Annotation Cluster 8      Enrichment Score: 0.5084786439026264

---

| Category | Term | Count | % | p value | FDR |
|----------|------|-------|---|---------|-----|
|----------|------|-------|---|---------|-----|

|               |                                                         |    |        |       |        |
|---------------|---------------------------------------------------------|----|--------|-------|--------|
| GOTERM_CC_FAT | GO:0034702~ion channel complex                          | 5  | 3.704  | 0.106 | 74.37  |
| GOTERM_MF_FAT | GO:0015276~ligand-gated ion channel activity            | 4  | 2.963  | 0.136 | 85.62  |
| GOTERM_MF_FAT | GO:0022834~ligand-gated channel activity                | 4  | 2.963  | 0.136 | 85.62  |
| GOTERM_MF_FAT | GO:0022836~gated channel activity                       | 6  | 4.444  | 0.166 | 91.08  |
| GOTERM_BP_FAT | GO:0030001~metal ion transport                          | 7  | 5.185  | 0.216 | 97.96  |
| GOTERM_MF_FAT | GO:0005261~cation channel activity                      | 5  | 3.704  | 0.275 | 98.61  |
| GOTERM_MF_FAT | GO:0005216~ion channel activity                         | 6  | 4.444  | 0.283 | 98.80  |
| GOTERM_MF_FAT | GO:0022838~substrate specific channel activity          | 6  | 4.444  | 0.311 | 99.28  |
| GOTERM_BP_FAT | GO:0006811~ion transport                                | 9  | 6.667  | 0.312 | 99.74  |
| GOTERM_BP_FAT | GO:0006812~cation transport                             | 7  | 5.185  | 0.331 | 99.84  |
| GOTERM_MF_FAT | GO:0015267~channel activity                             | 6  | 4.444  | 0.341 | 99.60  |
| GOTERM_CC_FAT | GO:0034703~cation channel complex                       | 3  | 2.222  | 0.343 | 99.40  |
| GOTERM_MF_FAT | GO:0022803~passive transmembrane transporter activity   | 6  | 4.444  | 0.343 | 99.62  |
| GOTERM_MF_FAT | GO:0046873~metal ion transmembrane transporter activity | 5  | 3.704  | 0.385 | 99.84  |
| GOTERM_BP_FAT | GO:0050877~neurological system process                  | 9  | 6.667  | 0.485 | 100.00 |
| GOTERM_CC_FAT | GO:0044459~plasma membrane part                         | 20 | 14.815 | 0.644 | 100.00 |
| GOTERM_CC_FAT | GO:0005887~integral to plasma membrane                  | 9  | 6.667  | 0.908 | 100.00 |
| GOTERM_CC_FAT | GO:0031226~intrinsic to plasma membrane                 | 9  | 6.667  | 0.918 | 100.00 |

---

Annotation Cluster 9

Enrichment Score: 0.49905155844646204

| Category      | Term                                                  | Count | %     | p value | FDR   |
|---------------|-------------------------------------------------------|-------|-------|---------|-------|
| GOTERM_BP_FAT | GO:0000187~activation of MAPK activity                | 4     | 2.963 | 0.027   | 35.13 |
| GOTERM_BP_FAT | GO:0043406~positive regulation of MAP kinase activity | 4     | 2.963 | 0.047   | 53.71 |
| GOTERM_BP_FAT | GO:0043405~regulation of MAP kinase activity          | 4     | 2.963 | 0.109   | 84.20 |
| GOTERM_BP_FAT | GO:0000165~MAPKKK cascade                             | 4     | 2.963 | 0.173   | 95.18 |
| GOTERM_BP_FAT | GO:0006468~protein amino acid phosphorylation         | 8     | 5.926 | 0.275   | 99.41 |

|               |                                                           |    |       |       |        |
|---------------|-----------------------------------------------------------|----|-------|-------|--------|
| GOTERM_BP_FAT | GO:0045860~positive regulation of protein kinase activity | 4  | 2.963 | 0.289 | 99.56  |
| GOTERM_BP_FAT | GO:0033674~positive regulation of kinase activity         | 4  | 2.963 | 0.304 | 99.70  |
| GOTERM_BP_FAT | GO:0051347~positive regulation of transferase activity    | 4  | 2.963 | 0.320 | 99.79  |
| GOTERM_BP_FAT | GO:0045859~regulation of protein kinase activity          | 5  | 3.704 | 0.333 | 99.85  |
| GOTERM_BP_FAT | GO:0043549~regulation of kinase activity                  | 5  | 3.704 | 0.349 | 99.89  |
| GOTERM_BP_FAT | GO:0042325~regulation of phosphorylation                  | 6  | 4.444 | 0.362 | 99.92  |
| GOTERM_BP_FAT | GO:0051338~regulation of transferase activity             | 5  | 3.704 | 0.367 | 99.93  |
| GOTERM_BP_FAT | GO:0051174~regulation of phosphorus metabolic process     | 6  | 4.444 | 0.385 | 99.96  |
| GOTERM_BP_FAT | GO:0019220~regulation of phosphate metabolic process      | 6  | 4.444 | 0.385 | 99.96  |
| GOTERM_BP_FAT | GO:0016310~phosphorylation                                | 8  | 5.926 | 0.415 | 99.98  |
| GOTERM_BP_FAT | GO:0006796~phosphate metabolic process                    | 9  | 6.667 | 0.481 | 100.00 |
| GOTERM_BP_FAT | GO:0006793~phosphorus metabolic process                   | 9  | 6.667 | 0.481 | 100.00 |
| GOTERM_BP_FAT | GO:0007243~protein kinase cascade                         | 4  | 2.963 | 0.588 | 100.00 |
| GOTERM_BP_FAT | GO:0007242~intracellular signaling cascade                | 10 | 7.407 | 0.707 | 100.00 |
| GOTERM_BP_FAT | GO:0044093~positive regulation of molecular function      | 5  | 3.704 | 0.765 | 100.00 |
| GOTERM_BP_FAT | GO:0043085~positive regulation of catalytic activity      | 4  | 2.963 | 0.842 | 100.00 |
| GOTERM_MF_FAT | GO:0004672~protein kinase activity                        | 3  | 2.222 | 0.969 | 100.00 |

---

Annotation Cluster 10

Enrichment Score: 0.47736470491945077

| Category      | Term                              | Count | %     | p value | FDR   |
|---------------|-----------------------------------|-------|-------|---------|-------|
| GOTERM_CC_FAT | GO:0030017~sarcomere              | 3     | 2.222 | 0.288   | 98.42 |
| GOTERM_CC_FAT | GO:0030016~myofibril              | 3     | 2.222 | 0.329   | 99.23 |
| GOTERM_CC_FAT | GO:0044449~contractile fiber part | 3     | 2.222 | 0.347   | 99.45 |
| GOTERM_CC_FAT | GO:0043292~contractile fiber      | 3     | 2.222 | 0.374   | 99.67 |

| Annotation Cluster 11 |                                              | Enrichment Score: 0.46215666450248655 |       |         |        |
|-----------------------|----------------------------------------------|---------------------------------------|-------|---------|--------|
| Category              | Term                                         | Count                                 | %     | p value | FDR    |
| GOTERM_BP_FAT         | GO:0009100~glycoprotein metabolic process    | 5                                     | 3.704 | 0.085   | 75.91  |
| GOTERM_BP_FAT         | GO:0009101~glycoprotein biosynthetic process | 4                                     | 2.963 | 0.140   | 90.97  |
| GOTERM_BP_FAT         | GO:0006486~protein amino acid glycosylation  | 3                                     | 2.222 | 0.284   | 99.51  |
| GOTERM_BP_FAT         | GO:0043413~biopolymer glycosylation          | 3                                     | 2.222 | 0.284   | 99.51  |
| GOTERM_BP_FAT         | GO:0070085~glycosylation                     | 3                                     | 2.222 | 0.284   | 99.51  |
| GOTERM_CC_FAT         | GO:0005794~Golgi apparatus                   | 9                                     | 6.667 | 0.404   | 99.82  |
| GOTERM_CC_FAT         | GO:0000139~Golgi membrane                    | 3                                     | 2.222 | 0.479   | 99.96  |
| GOTERM_CC_FAT         | GO:0012505~endomembrane system               | 7                                     | 5.185 | 0.663   | 100.00 |
| GOTERM_CC_FAT         | GO:0044431~Golgi apparatus part              | 3                                     | 2.222 | 0.715   | 100.00 |
| GOTERM_CC_FAT         | GO:0031090~organelle membrane                | 6                                     | 4.444 | 0.958   | 100.00 |

---

| Annotation Cluster 12 |                                      | Enrichment Score: 0.4329072021759315 |        |         |       |
|-----------------------|--------------------------------------|--------------------------------------|--------|---------|-------|
| Category              | Term                                 | Count                                | %      | p value | FDR   |
| GOTERM_CC_FAT         | GO:0005576~extracellular region      | 22                                   | 16.296 | 0.244   | 96.68 |
| GOTERM_CC_FAT         | GO:0005615~extracellular space       | 9                                    | 6.667  | 0.415   | 99.85 |
| GOTERM_CC_FAT         | GO:0044421~extracellular region part | 11                                   | 8.148  | 0.497   | 99.98 |

---

| Annotation Cluster 13 |                                                                                 | Enrichment Score: 0.4050936612964293 |       |         |       |
|-----------------------|---------------------------------------------------------------------------------|--------------------------------------|-------|---------|-------|
| Category              | Term                                                                            | Count                                | %     | p value | FDR   |
| GOTERM_BP_FAT         | GO:0003007~heart morphogenesis                                                  | 3                                    | 2.222 | 0.121   | 87.29 |
| GOTERM_BP_FAT         | GO:0035270~endocrine system development                                         | 3                                    | 2.222 | 0.137   | 90.44 |
| GOTERM_BP_FAT         | GO:0045165~cell fate commitment                                                 | 4                                    | 2.963 | 0.153   | 92.99 |
| GOTERM_BP_FAT         | GO:0045944~positive regulation of transcription from RNA polymerase II promoter | 6                                    | 4.444 | 0.229   | 98.44 |
| GOTERM_BP_FAT         | GO:0007507~heart development                                                    | 4                                    | 2.963 | 0.285   | 99.53 |
| GOTERM_BP_FAT         | GO:0030182~neuron differentiation                                               | 6                                    | 4.444 | 0.298   | 99.65 |

|               |                                                                                                         |    |        |       |        |
|---------------|---------------------------------------------------------------------------------------------------------|----|--------|-------|--------|
| GOTERM_BP_FAT | GO:0010557~positive regulation of macromolecule biosynthetic process                                    | 8  | 5.926  | 0.336 | 99.86  |
| GOTERM_BP_FAT | GO:0045941~positive regulation of transcription                                                         | 7  | 5.185  | 0.354 | 99.91  |
| GOTERM_BP_FAT | GO:0010628~positive regulation of gene expression                                                       | 7  | 5.185  | 0.383 | 99.96  |
| GOTERM_BP_FAT | GO:0031328~positive regulation of cellular biosynthetic process                                         | 8  | 5.926  | 0.386 | 99.96  |
| GOTERM_BP_FAT | GO:0045893~positive regulation of transcription, DNA-dependent                                          | 6  | 4.444  | 0.399 | 99.97  |
| GOTERM_BP_FAT | GO:0009891~positive regulation of biosynthetic process                                                  | 8  | 5.926  | 0.400 | 99.97  |
| GOTERM_BP_FAT | GO:0051254~positive regulation of RNA metabolic process                                                 | 6  | 4.444  | 0.404 | 99.97  |
| GOTERM_BP_FAT | GO:0006357~regulation of transcription from RNA polymerase II promoter                                  | 8  | 5.926  | 0.417 | 99.98  |
| GOTERM_BP_FAT | GO:0045935~positive regulation of nucleobase, nucleoside, nucleotide and nucleic acid metabolic process | 7  | 5.185  | 0.448 | 99.99  |
| GOTERM_MF_FAT | GO:0043565~sequence-specific DNA binding                                                                | 7  | 5.185  | 0.450 | 99.96  |
| GOTERM_BP_FAT | GO:0010604~positive regulation of macromolecule metabolic process                                       | 9  | 6.667  | 0.451 | 99.99  |
| GOTERM_BP_FAT | GO:0051173~positive regulation of nitrogen compound metabolic process                                   | 7  | 5.185  | 0.477 | 100.00 |
| GOTERM_MF_FAT | GO:0003700~transcription factor activity                                                                | 10 | 7.407  | 0.498 | 99.99  |
| GOTERM_MF_FAT | GO:0016563~transcription activator activity                                                             | 5  | 3.704  | 0.519 | 99.99  |
| GOTERM_MF_FAT | GO:0030528~transcription regulator activity                                                             | 14 | 10.370 | 0.536 | 100.00 |
| GOTERM_BP_FAT | GO:0051252~regulation of RNA metabolic process                                                          | 14 | 10.370 | 0.565 | 100.00 |
| GOTERM_BP_FAT | GO:0006355~regulation of transcription, DNA-dependent                                                   | 13 | 9.630  | 0.642 | 100.00 |
| GOTERM_BP_FAT | GO:0045449~regulation of transcription                                                                  | 17 | 12.593 | 0.781 | 100.00 |
| GOTERM_MF_FAT | GO:0003677~DNA binding                                                                                  | 16 | 11.852 | 0.832 | 100.00 |
| GOTERM_BP_FAT | GO:0006350~transcription                                                                                | 12 | 8.889  | 0.887 | 100.00 |

| Annotation Cluster 14 |                                  | Enrichment Score: 0.3814899036994951 |       |         |        |
|-----------------------|----------------------------------|--------------------------------------|-------|---------|--------|
| Category              | Term                             | Count                                | %     | p value | FDR    |
| GOTERM_CC_FAT         | GO:0030054~cell junction         | 7                                    | 5.185 | 0.335   | 99.30  |
| GOTERM_CC_FAT         | GO:0045211~postsynaptic membrane | 3                                    | 2.222 | 0.369   | 99.64  |
| GOTERM_CC_FAT         | GO:0044456~synapse part          | 4                                    | 2.963 | 0.393   | 99.77  |
| GOTERM_CC_FAT         | GO:0045202~synapse               | 4                                    | 2.963 | 0.614   | 100.00 |

  

| Annotation Cluster 15 |                                          | Enrichment Score: 0.37723503483387205 |       |         |        |
|-----------------------|------------------------------------------|---------------------------------------|-------|---------|--------|
| Category              | Term                                     | Count                                 | %     | p value | FDR    |
| GOTERM_BP_FAT         | GO:0007268~synaptic transmission         | 5                                     | 3.704 | 0.304   | 99.69  |
| GOTERM_BP_FAT         | GO:0019226~transmission of nerve impulse | 5                                     | 3.704 | 0.402   | 99.97  |
| GOTERM_BP_FAT         | GO:0050877~neurological system process   | 9                                     | 6.667 | 0.485   | 100.00 |
| GOTERM_BP_FAT         | GO:0007267~cell-cell signaling           | 7                                     | 5.185 | 0.523   | 100.00 |

  

| Annotation Cluster 16 |                                                       | Enrichment Score: 0.3751858189340333 |       |         |        |
|-----------------------|-------------------------------------------------------|--------------------------------------|-------|---------|--------|
| Category              | Term                                                  | Count                                | %     | p value | FDR    |
| GOTERM_BP_FAT         | GO:0030001~metal ion transport                        | 7                                    | 5.185 | 0.216   | 97.96  |
| GOTERM_BP_FAT         | GO:0006812~cation transport                           | 7                                    | 5.185 | 0.331   | 99.84  |
| GOTERM_BP_FAT         | GO:0006816~calcium ion transport                      | 3                                    | 2.222 | 0.339   | 99.87  |
| GOTERM_BP_FAT         | GO:0015674~di-, tri-valent inorganic cation transport | 3                                    | 2.222 | 0.442   | 99.99  |
| GOTERM_MF_FAT         | GO:0031420~alkali metal ion binding                   | 3                                    | 2.222 | 0.684   | 100.00 |
| GOTERM_BP_FAT         | GO:0015672~monovalent inorganic cation transport      | 3                                    | 2.222 | 0.765   | 100.00 |

  

| Annotation Cluster 17 |                                    | Enrichment Score: 0.3735251918508316 |       |         |       |
|-----------------------|------------------------------------|--------------------------------------|-------|---------|-------|
| Category              | Term                               | Count                                | %     | p value | FDR   |
| GOTERM_BP_FAT         | GO:0051046~regulation of secretion | 4                                    | 2.963 | 0.311   | 99.74 |



|               |                                                |   |       |       |        |
|---------------|------------------------------------------------|---|-------|-------|--------|
| GOTERM_BP_FAT | GO:0007610~behavior                            | 6 | 4.444 | 0.427 | 99.99  |
| GOTERM_BP_FAT | GO:0060341~regulation of cellular localization | 4 | 2.963 | 0.427 | 99.99  |
| GOTERM_BP_FAT | GO:0007626~locomotory behavior                 | 4 | 2.963 | 0.461 | 99.99  |
| GOTERM_BP_FAT | GO:0006935~chemotaxis                          | 3 | 2.222 | 0.469 | 100.00 |
| GOTERM_BP_FAT | GO:0042330~taxis                               | 3 | 2.222 | 0.469 | 100.00 |

---

Annotation Cluster 18      Enrichment Score: 0.35440431602242245

---

| Category      | Term                             | Count | %     | p value | FDR    |
|---------------|----------------------------------|-------|-------|---------|--------|
| GOTERM_BP_FAT | GO:0001775~cell activation       | 5     | 3.704 | 0.263   | 99.23  |
| GOTERM_BP_FAT | GO:0046649~lymphocyte activation | 3     | 2.222 | 0.521   | 100.00 |
| GOTERM_BP_FAT | GO:0045321~leukocyte activation  | 3     | 2.222 | 0.632   | 100.00 |

---

Annotation Cluster 19      Enrichment Score: 0.344009405486796

---

| Category      | Term                          | Count | %     | p value | FDR    |
|---------------|-------------------------------|-------|-------|---------|--------|
| GOTERM_CC_FAT | GO:0019717~synaptosome        | 3     | 2.222 | 0.193   | 92.71  |
| GOTERM_CC_FAT | GO:0000267~cell fraction      | 12    | 8.889 | 0.420   | 99.87  |
| GOTERM_CC_FAT | GO:0005626~insoluble fraction | 8     | 5.926 | 0.671   | 100.00 |
| GOTERM_CC_FAT | GO:0005624~membrane fraction  | 7     | 5.185 | 0.772   | 100.00 |

---

Annotation Cluster 20      Enrichment Score: 0.2869411201436296

---

| Category      | Term                                                | Count | %     | p value | FDR    |
|---------------|-----------------------------------------------------|-------|-------|---------|--------|
| GOTERM_BP_FAT | GO:0050767~regulation of neurogenesis               | 3     | 2.222 | 0.461   | 99.99  |
| GOTERM_BP_FAT | GO:0051960~regulation of nervous system development | 3     | 2.222 | 0.531   | 100.00 |
| GOTERM_BP_FAT | GO:0060284~regulation of cell development           | 3     | 2.222 | 0.562   | 100.00 |

---

Annotation Cluster 21      Enrichment Score: 0.2755636424922422

---

| Category | Term | Count | % | p value | FDR |
|----------|------|-------|---|---------|-----|
|----------|------|-------|---|---------|-----|

|               |                                      |   |       |       |        |
|---------------|--------------------------------------|---|-------|-------|--------|
| GOTERM_BP_FAT | GO:0008380~RNA splicing              | 4 | 2.963 | 0.317 | 99.77  |
| GOTERM_MF_FAT | GO:0003723~RNA binding               | 7 | 5.185 | 0.446 | 99.96  |
| GOTERM_BP_FAT | GO:0016071~mRNA metabolic process    | 4 | 2.963 | 0.502 | 100.00 |
| GOTERM_BP_FAT | GO:0006396~RNA processing            | 5 | 3.704 | 0.519 | 100.00 |
| GOTERM_BP_FAT | GO:0006397~mRNA processing           | 3 | 2.222 | 0.669 | 100.00 |
| GOTERM_CC_FAT | GO:0030529~ribonucleoprotein complex | 3 | 2.222 | 0.900 | 100.00 |

---

Annotation Cluster 22      Enrichment Score: 0.2742875941180644

---

| Category      | Term                                                        | Count | %     | p value | FDR    |
|---------------|-------------------------------------------------------------|-------|-------|---------|--------|
| GOTERM_BP_FAT | GO:0007276~gamete generation                                | 5     | 3.704 | 0.349   | 99.89  |
| GOTERM_BP_FAT | GO:0019953~sexual reproduction                              | 5     | 3.704 | 0.472   | 100.00 |
| GOTERM_BP_FAT | GO:0032504~multicellular organism reproduction              | 5     | 3.704 | 0.539   | 100.00 |
| GOTERM_BP_FAT | GO:0048609~reproductive process in a multicellular organism | 5     | 3.704 | 0.539   | 100.00 |
| GOTERM_BP_FAT | GO:0007283~spermatogenesis                                  | 3     | 2.222 | 0.688   | 100.00 |
| GOTERM_BP_FAT | GO:0048232~male gamete generation                           | 3     | 2.222 | 0.688   | 100.00 |

---

Annotation Cluster 23      Enrichment Score: 0.2583863578081032

---

| Category      | Term                                                                                | Count | %     | p value | FDR    |
|---------------|-------------------------------------------------------------------------------------|-------|-------|---------|--------|
| GOTERM_BP_FAT | GO:0007178~transmembrane receptor protein serine/threonine kinase signaling pathway | 3     | 2.222 | 0.211   | 97.72  |
| GOTERM_BP_FAT | GO:0007167~enzyme linked receptor protein signaling pathway                         | 3     | 2.222 | 0.803   | 100.00 |
| GOTERM_BP_FAT | GO:0007166~cell surface receptor linked signal transduction                         | 7     | 5.185 | 0.992   | 100.00 |

---

Annotation Cluster 24      Enrichment Score: 0.23477071937104096

---

| Category      | Term                                                        | Count | %     | p value | FDR    |
|---------------|-------------------------------------------------------------|-------|-------|---------|--------|
| GOTERM_BP_FAT | GO:0032268~regulation of cellular protein metabolic process | 5     | 3.704 | 0.524   | 100.00 |

|               |                                                                      |   |       |       |        |
|---------------|----------------------------------------------------------------------|---|-------|-------|--------|
| GOTERM_BP_FAT | GO:0032270~positive regulation of cellular protein metabolic process | 3 | 2.222 | 0.605 | 100.00 |
| GOTERM_BP_FAT | GO:0051247~positive regulation of protein metabolic process          | 3 | 2.222 | 0.623 | 100.00 |

---

Annotation Cluster 25      Enrichment Score: 0.20968335675558622

---

| Category      | Term                                    | Count | %      | p value | FDR    |
|---------------|-----------------------------------------|-------|--------|---------|--------|
| GOTERM_MF_FAT | GO:0008270~zinc ion binding             | 19    | 14.074 | 0.404   | 99.90  |
| GOTERM_MF_FAT | GO:0046914~transition metal ion binding | 22    | 16.296 | 0.527   | 100.00 |
| GOTERM_MF_FAT | GO:0043167~ion binding                  | 32    | 23.704 | 0.734   | 100.00 |
| GOTERM_MF_FAT | GO:0046872~metal ion binding            | 31    | 22.963 | 0.746   | 100.00 |
| GOTERM_MF_FAT | GO:0043169~cation binding               | 31    | 22.963 | 0.768   | 100.00 |

---

Annotation Cluster 26      Enrichment Score: 0.20836007234614076

---

| Category      | Term                                                    | Count | %      | p value | FDR    |
|---------------|---------------------------------------------------------|-------|--------|---------|--------|
| GOTERM_MF_FAT | GO:0008092~cytoskeletal protein binding                 | 6     | 4.444  | 0.422   | 99.93  |
| GOTERM_CC_FAT | GO:0044430~cytoskeletal part                            | 9     | 6.667  | 0.476   | 99.96  |
| GOTERM_CC_FAT | GO:0015630~microtubule cytoskeleton                     | 5     | 3.704  | 0.594   | 100.00 |
| GOTERM_CC_FAT | GO:0005856~cytoskeleton                                 | 11    | 8.148  | 0.639   | 100.00 |
| GOTERM_CC_FAT | GO:0043232~intracellular non-membrane-bounded organelle | 17    | 12.593 | 0.859   | 100.00 |
| GOTERM_CC_FAT | GO:0043228~non-membrane-bounded organelle               | 17    | 12.593 | 0.859   | 100.00 |

---

Annotation Cluster 27      Enrichment Score: 0.19709029864617553

---

| Category      | Term                                   | Count | %     | p value | FDR    |
|---------------|----------------------------------------|-------|-------|---------|--------|
| GOTERM_BP_FAT | GO:0050877~neurological system process | 9     | 6.667 | 0.485   | 100.00 |
| GOTERM_BP_FAT | GO:0050890~cognition                   | 5     | 3.704 | 0.707   | 100.00 |
| GOTERM_BP_FAT | GO:0007600~sensory perception          | 4     | 2.963 | 0.748   | 100.00 |

| Annotation Cluster 28 |                                                                 | Enrichment Score: 0.19438566956152456 |       |         |        |
|-----------------------|-----------------------------------------------------------------|---------------------------------------|-------|---------|--------|
| Category              | Term                                                            | Count                                 | %     | p value | FDR    |
| GOTERM_BP_FAT         | GO:0006461~protein complex assembly                             | 5                                     | 3.704 | 0.570   | 100.00 |
| GOTERM_BP_FAT         | GO:0070271~protein complex biogenesis                           | 5                                     | 3.704 | 0.570   | 100.00 |
| GOTERM_BP_FAT         | GO:0065003~macromolecular complex assembly                      | 6                                     | 4.444 | 0.597   | 100.00 |
| GOTERM_BP_FAT         | GO:0043933~macromolecular complex subunit organization          | 6                                     | 4.444 | 0.660   | 100.00 |
| GOTERM_BP_FAT         | GO:0034622~cellular macromolecular complex assembly             | 3                                     | 2.222 | 0.703   | 100.00 |
| GOTERM_BP_FAT         | GO:0034621~cellular macromolecular complex subunit organization | 3                                     | 2.222 | 0.758   | 100.00 |

  

| Annotation Cluster 29 |                                                                | Enrichment Score: 0.18739516622803057 |       |         |        |
|-----------------------|----------------------------------------------------------------|---------------------------------------|-------|---------|--------|
| Category              | Term                                                           | Count                                 | %     | p value | FDR    |
| GOTERM_BP_FAT         | GO:0006508~proteolysis                                         | 10                                    | 7.407 | 0.372   | 99.94  |
| GOTERM_MF_FAT         | GO:0004175~endopeptidase activity                              | 4                                     | 2.963 | 0.657   | 100.00 |
| GOTERM_MF_FAT         | GO:0070011~peptidase activity, acting on L-amino acid peptides | 4                                     | 2.963 | 0.843   | 100.00 |
| GOTERM_MF_FAT         | GO:0008233~peptidase activity                                  | 4                                     | 2.963 | 0.863   | 100.00 |

  

| Annotation Cluster 30 |                                                 | Enrichment Score: 0.13659216707106298 |       |         |        |
|-----------------------|-------------------------------------------------|---------------------------------------|-------|---------|--------|
| Category              | Term                                            | Count                                 | %     | p value | FDR    |
| GOTERM_CC_FAT         | GO:0030141~secretory granule                    | 3                                     | 2.222 | 0.537   | 99.99  |
| GOTERM_CC_FAT         | GO:0016023~cytoplasmic membrane-bounded vesicle | 5                                     | 3.704 | 0.733   | 100.00 |
| GOTERM_CC_FAT         | GO:0031988~membrane-bounded vesicle             | 5                                     | 3.704 | 0.757   | 100.00 |
| GOTERM_CC_FAT         | GO:0031410~cytoplasmic vesicle                  | 5                                     | 3.704 | 0.820   | 100.00 |
| GOTERM_CC_FAT         | GO:0031982~vesicle                              | 5                                     | 3.704 | 0.850   | 100.00 |

  

| Annotation Cluster 31 |  | Enrichment Score: 0.10172376949180104 |  |  |  |
|-----------------------|--|---------------------------------------|--|--|--|
|-----------------------|--|---------------------------------------|--|--|--|

| Category      | Term                                     | Count | %     | p value | FDR    |
|---------------|------------------------------------------|-------|-------|---------|--------|
| GOTERM_MF_FAT | GO:0005525~GTP binding                   | 3     | 2.222 | 0.779   | 100.00 |
| GOTERM_MF_FAT | GO:0019001~guanyl nucleotide binding     | 3     | 2.222 | 0.797   | 100.00 |
| GOTERM_MF_FAT | GO:0032561~guanyl ribonucleotide binding | 3     | 2.222 | 0.797   | 100.00 |

---

Annotation Cluster 32      Enrichment Score: 0.10033844682052483

---

| Category      | Term                                                    | Count | %     | p value | FDR    |
|---------------|---------------------------------------------------------|-------|-------|---------|--------|
| GOTERM_BP_FAT | GO:0042981~regulation of apoptosis                      | 8     | 5.926 | 0.572   | 100.00 |
| GOTERM_BP_FAT | GO:0043067~regulation of programmed cell death          | 8     | 5.926 | 0.581   | 100.00 |
| GOTERM_BP_FAT | GO:0010941~regulation of cell death                     | 8     | 5.926 | 0.586   | 100.00 |
| GOTERM_BP_FAT | GO:0043066~negative regulation of apoptosis             | 3     | 2.222 | 0.846   | 100.00 |
| GOTERM_BP_FAT | GO:0043069~negative regulation of programmed cell death | 3     | 2.222 | 0.850   | 100.00 |
| GOTERM_BP_FAT | GO:0060548~negative regulation of cell death            | 3     | 2.222 | 0.851   | 100.00 |
| GOTERM_BP_FAT | GO:0043065~positive regulation of apoptosis             | 3     | 2.222 | 0.891   | 100.00 |
| GOTERM_BP_FAT | GO:0043068~positive regulation of programmed cell death | 3     | 2.222 | 0.893   | 100.00 |
| GOTERM_BP_FAT | GO:0010942~positive regulation of cell death            | 3     | 2.222 | 0.895   | 100.00 |
| GOTERM_BP_FAT | GO:0022402~cell cycle process                           | 3     | 2.222 | 0.943   | 100.00 |
| GOTERM_BP_FAT | GO:0007049~cell cycle                                   | 3     | 2.222 | 0.985   | 100.00 |

---

Annotation Cluster 33      Enrichment Score: 0.08969046576078288

---

| Category      | Term                                                    | Count | %      | p value | FDR    |
|---------------|---------------------------------------------------------|-------|--------|---------|--------|
| GOTERM_CC_FAT | GO:0005730~nucleolus                                    | 7     | 5.185  | 0.441   | 99.92  |
| GOTERM_CC_FAT | GO:0031981~nuclear lumen                                | 10    | 7.407  | 0.815   | 100.00 |
| GOTERM_CC_FAT | GO:0043232~intracellular non-membrane-bounded organelle | 17    | 12.593 | 0.859   | 100.00 |
| GOTERM_CC_FAT | GO:0043228~non-membrane-bounded organelle               | 17    | 12.593 | 0.859   | 100.00 |
| GOTERM_CC_FAT | GO:0070013~intracellular organelle lumen                | 10    | 7.407  | 0.952   | 100.00 |

|               |                                    |    |       |       |        |
|---------------|------------------------------------|----|-------|-------|--------|
| GOTERM_CC_FAT | GO:0043233~organelle lumen         | 10 | 7.407 | 0.963 | 100.00 |
| GOTERM_CC_FAT | GO:0031974~membrane-enclosed lumen | 10 | 7.407 | 0.969 | 100.00 |

---

| Annotation Cluster 34 |                                          | Enrichment Score: 0.0796247136988019 |        |         |        |
|-----------------------|------------------------------------------|--------------------------------------|--------|---------|--------|
| Category              | Term                                     | Count                                | %      | p value | FDR    |
| GOTERM_MF_FAT         | GO:0000166~nucleotide binding            | 17                                   | 12.593 | 0.724   | 100.00 |
| GOTERM_MF_FAT         | GO:0001882~nucleoside binding            | 12                                   | 8.889  | 0.783   | 100.00 |
| GOTERM_MF_FAT         | GO:0032553~ribonucleotide binding        | 13                                   | 9.630  | 0.820   | 100.00 |
| GOTERM_MF_FAT         | GO:0032555~purine ribonucleotide binding | 13                                   | 9.630  | 0.820   | 100.00 |
| GOTERM_MF_FAT         | GO:0001883~purine nucleoside binding     | 11                                   | 8.148  | 0.856   | 100.00 |
| GOTERM_MF_FAT         | GO:0005524~ATP binding                   | 10                                   | 7.407  | 0.862   | 100.00 |
| GOTERM_MF_FAT         | GO:0017076~purine nucleotide binding     | 13                                   | 9.630  | 0.863   | 100.00 |
| GOTERM_MF_FAT         | GO:0032559~adenyl ribonucleotide binding | 10                                   | 7.407  | 0.873   | 100.00 |
| GOTERM_MF_FAT         | GO:0030554~adenyl nucleotide binding     | 10                                   | 7.407  | 0.908   | 100.00 |

---

| Annotation Cluster 35 |                                          | Enrichment Score: 0.07931744355330472 |       |         |        |
|-----------------------|------------------------------------------|---------------------------------------|-------|---------|--------|
| Category              | Term                                     | Count                                 | %     | p value | FDR    |
| GOTERM_BP_FAT         | GO:0048878~chemical homeostasis          | 5                                     | 3.704 | 0.686   | 100.00 |
| GOTERM_BP_FAT         | GO:0042592~homeostatic process           | 6                                     | 4.444 | 0.796   | 100.00 |
| GOTERM_BP_FAT         | GO:0006873~cellular ion homeostasis      | 3                                     | 2.222 | 0.862   | 100.00 |
| GOTERM_BP_FAT         | GO:0055082~cellular chemical homeostasis | 3                                     | 2.222 | 0.869   | 100.00 |
| GOTERM_BP_FAT         | GO:0050801~ion homeostasis               | 3                                     | 2.222 | 0.888   | 100.00 |
| GOTERM_BP_FAT         | GO:0019725~cellular homeostasis          | 3                                     | 2.222 | 0.920   | 100.00 |

Note. FDR = False Discovery Rate
